# Supplementary material for: Transcriptional Regulation of Proanthocyanidin Biosynthesis Pathway Genes and Transcription factors in Indigofera stachyodes Lindl. Roots.
Source: Research Square preprint supplement (doi:10.21203/rs.3.rs-1419639/v1), 2022-03-31
Supplement: Supplementary file 1 [file 8847d0bb5c394770256d186f.xlsx]

## Sheet: Sheet1
Summary of sequence assembly and function annotation of the I. stachyodes transcriptome
Assembly	Values
Total number of unigenes	110779
Total length (bp)	92992355
Average length (bp)	839.44
N50 (bp)	1540
E90N50 (bp)	3117
Unigenes (＞1 kb)	24442
Unigenes (＞2 kb)	11713
Annotation
Protein database searches	Values	Percentage (%)
BLASTx against NR	57789	52.17
BLASTx against Swiss-Prot	46559	42.03
BLASTx against COG	53295	48.11
BLASTx against Pfam	46581	42.05
All annotated transcripts	63863	57.65
Functional classification and pathway mapping
Annotated with Gene Ontology (GO) terms	45036	40.65
Annotations against KEGG	32950	29.74
