# Supplementary material for: Transcriptional Regulation of Proanthocyanidin Biosynthesis Pathway Genes and Transcription factors in Indigofera stachyodes Lindl. Roots.
Source: Research Square preprint supplement (doi:10.21203/rs.3.rs-1419639/v1), 2022-03-31
Supplement: Supplementary file 2 [file fbf2d39551259b39cfb29d06.xlsx]

## Sheet: Sheet1
Summary of sequencing data of I. stachyodes tissues
Sample	Raw reads	Raw bases (G)	Clean reads	Clean bases (G)	Error (%)	Q20(%)	Q30(%)	GC (%)
Leaf 1	57380918	8.66	56622822	8.18	0.0241	98.42	95.05	44.91
Leaf 2	55417882	8.37	54661524	7.89	0.0243	98.35	94.87	45.3
Leaf 3	50146734	7.57	49534700	7.18	0.024	98.46	95.15	44.91
RootII 1	52393508	7.91	51622620	7.58	0.0244	98.28	94.69	44.27
RootII 2	53938356	8.14	53103264	7.77	0.0245	98.26	94.64	45.12
RootII 3	54622360	8.25	53782230	7.84	0.0244	98.25	94.7	45.27
RootI 1	53824822	8.13	53242404	7.85	0.0244	98.31	94.75	44.47
RootI 2	59731776	9.02	59098624	8.68	0.0243	98.33	94.83	44.31
RootI 3	58263898	8.8	57633064	8.51	0.0244	98.29	94.69	44.44
Stem 1	68302502	10.31	67625098	9.88	0.024	98.46	95.13	44.05
Stem 2	60423550	9.12	59844634	8.81	0.024	98.44	95.1	44.19
Stem 3	52498226	7.93	52023850	7.69	0.024	98.44	95.08	44.24
