# Supplementary material for: Transcriptional Regulation of Proanthocyanidin Biosynthesis Pathway Genes and Transcription factors in Indigofera stachyodes Lindl. Roots.
Source: Research Square preprint supplement (doi:10.21203/rs.3.rs-1419639/v1), 2022-03-31
Supplement: Supplementary file 3 [file 482be4795f41ca380f2df7cb.xlsx]

## Sheet: Sheet1
Gene_id	name	Ls_leaf_1	Ls_leaf_2	Ls_leaf_3	Ls_rootII_1	Ls_rootII_2	Ls_rootII_3	Ls_rootI_1	Ls_rootI_2	Ls_rootI_3	Ls_stem_1	Ls_stem_2	Ls_stem_3
TRINITY_DN10119_c0_g1	IsAP2/ERF1	50.23	48.21	51.8	84.26	70.12	73.66	102.24	96.54	89.04	83.38	88.6	88.92
TRINITY_DN10286_c0_g1	IsAP2/ERF2	0.03	0.11	0.03	6.69	5.13	6.05	0.55	0.58	0.78	1.53	1.88	2.41
TRINITY_DN109_c1_g1	IsAP2/ERF3	8.98	7.97	8.33	20.34	18.08	18.24	4.12	3.37	3.75	0.69	0.36	0.34
TRINITY_DN11074_c0_g2	IsAP2/ERF4	1.05	0.35	0.41	0.62	0.33	0.35	2.6	3.47	1.85	0.42	0.23	0.1
TRINITY_DN11196_c0_g1	IsAP2/ERF5	49.8	42.99	46.58	28.82	23.56	22.68	38.41	43.54	41.25	10.58	10.32	9.42
TRINITY_DN11363_c0_g1	IsAP2/ERF6	2.16	1.48	1.93	0.88	0.7	0.78	0.46	1.08	1.04	0.53	0.81	0.21
TRINITY_DN1215_c0_g1	IsAP2/ERF7	103.32	96.02	102.3	117.14	107.2	105.23	118.62	117.7	116.23	247.53	252.06	258.26
TRINITY_DN1215_c0_g2	IsAP2/ERF8	17.22	16.03	15.77	17.35	14.4	15.44	13.92	13.88	13	4.7	6.55	6.18
TRINITY_DN1215_c1_g1	IsAP2/ERF9	3.31	3.61	3.42	35.06	31.6	29.11	23.37	22.34	21.8	9.5	9.96	9.26
TRINITY_DN12165_c0_g2	IsAP2/ERF10	65.66	59.33	65.52	8.73	7.97	8.16	4.64	5.8	5.24	9.93	9.54	9.25
TRINITY_DN12413_c0_g1	IsAP2/ERF11	1.03	1.08	1.04	36.61	29.6	26.72	59.04	62.98	64.95	17.57	19.11	20.1
TRINITY_DN12518_c0_g1	IsAP2/ERF12	1.6	1.2	1.03	3.4	1.25	0.79	3.73	3.14	2.89	4.17	4.3	4.51
TRINITY_DN13065_c3_g1	IsAP2/ERF13	3.42	2.65	2.39	6.02	5.22	5.47	20.94	21.13	20.16	5.93	6.31	5.81
TRINITY_DN13098_c0_g1	IsAP2/ERF14	0.08	0.08	0.27	23.29	20.59	19.33	23.77	23.08	21.56	0.31	0.07	0.25
TRINITY_DN13237_c0_g1	IsAP2/ERF15	5.75	5.51	5.78	3.84	3.1	3.26	5.36	5.23	5.47	0.08	0.09	0
TRINITY_DN13653_c0_g1	IsAP2/ERF16	0.02	0	0	3.08	2.54	1.86	0	0	0.13	0	0	0.02
TRINITY_DN13653_c0_g2	IsAP2/ERF17	0.02	0	0	2.54	1.78	1.77	0	0	0	0.6	0.42	0.74
TRINITY_DN13966_c0_g1	IsAP2/ERF18	2.3	3.17	4.22	0.26	0.24	0.48	0.66	0.34	0.24	0.7	0.23	0.14
TRINITY_DN14730_c0_g1	IsAP2/ERF19	120.76	118.37	124.86	93.57	85.82	88.19	143.51	149.34	137.91	14.29	15.1	13.45
TRINITY_DN14799_c0_g1	IsAP2/ERF20	77.45	68.02	72.37	3.7	3.35	3.1	2.88	2.86	1.97	0.15	0.21	0.24
TRINITY_DN1504_c0_g1	IsAP2/ERF21	48.95	46.33	49.78	90.27	82.24	78.3	91.16	92.67	87.57	81.43	79.98	77.64
TRINITY_DN15575_c0_g1	IsAP2/ERF22	51.84	46.31	55.13	0.36	1.13	0.33	0.57	0.38	0.65	0.17	0.25	0.45
TRINITY_DN15952_c0_g4	IsAP2/ERF23	1.09	0.75	0.96	0.41	0.49	0.36	0.75	0.69	0.56	0.99	0.71	0.95
TRINITY_DN16105_c0_g1	IsAP2/ERF24	97.97	89.5	100.83	12.13	10.76	9.38	15.62	14.37	15.22	1.6	1.56	2.03
TRINITY_DN16192_c0_g1	IsAP2/ERF25	104.26	95.69	103.76	30.07	24.65	27.01	77.64	80.72	79.04	7.23	7.67	7.4
TRINITY_DN165_c0_g1	IsAP2/ERF26	20.06	20.17	24.4	37.03	30.25	30.27	17.98	17.06	17.2	29.72	30.29	32.58
TRINITY_DN17586_c0_g1	IsAP2/ERF27	0	0	0	0.76	0	2.05	0	0	0.76	0	0	0
TRINITY_DN17586_c1_g1	IsAP2/ERF28	0	0	0	6.25	5.63	4.5	0.42	0.28	0.42	0.09	0	0.08
TRINITY_DN17989_c0_g1	IsAP2/ERF29	9.47	9.14	9.93	6.28	5.09	4	1.49	0.82	1.16	2.92	3.77	3.18
TRINITY_DN18308_c0_g3	IsAP2/ERF30	9.67	10.55	10.71	21.29	19.49	17.88	10.72	11.46	11.31	5.67	7.7	6.76
TRINITY_DN18308_c0_g4	IsAP2/ERF31	0.53	0.26	0.61	0.95	0.25	0.99	0	0.12	0	0.31	1.07	0.86
TRINITY_DN18472_c0_g1	IsAP2/ERF32	1.27	1.67	0.29	1.04	1.83	1.04	0	0.23	0	2.41	1.16	0.4
TRINITY_DN1935_c0_g1	IsAP2/ERF33	43.52	41	43.82	24.9	23.13	22.14	8.6	9.36	7.76	20.69	20.95	22.03
TRINITY_DN1935_c0_g2	IsAP2/ERF34	77.71	70.83	73.97	48.54	41.99	43.26	66.05	69.4	72.02	45.98	46.3	49.13
TRINITY_DN19833_c0_g1	IsAP2/ERF35	1.79	2.03	1.66	5.52	5.91	5.57	4.25	4.07	5.01	0.1	0	0.17
TRINITY_DN20021_c0_g1	IsAP2/ERF36	9.6	11.32	10.47	9.13	8.32	7.72	2.08	2.07	2.52	0.56	0.59	0.8
TRINITY_DN20721_c0_g1	IsAP2/ERF37	6.15	5.29	6.84	3.67	3.46	3.68	20.7	22.84	20.38	0.42	0.46	0.6
TRINITY_DN2163_c0_g1	IsAP2/ERF38	109.3	107.38	114.46	13.77	11.13	10.68	22.76	29.43	23.41	4.42	2.96	3.48
TRINITY_DN22391_c0_g1	IsAP2/ERF39	23.28	21.92	23.61	10.12	8.1	7.56	4.26	4.21	3.97	27.34	27.54	28.56
TRINITY_DN22712_c0_g1	IsAP2/ERF40	0.5	0	0	1.05	0.47	1.9	0	0.46	0	0	0	0
TRINITY_DN22806_c0_g1	IsAP2/ERF41	1.33	1.17	2.24	7.3	5.66	5.54	37.95	46.2	41.75	3.3	2.3	2.47
TRINITY_DN23065_c0_g1	IsAP2/ERF42	0.61	0.27	0.54	1.03	1.59	2.27	3.47	3.83	2.05	10.67	11.68	11.79
TRINITY_DN2355_c0_g2	IsAP2/ERF43	44.87	42.7	47.44	34.19	32.55	31.93	41.43	39.17	41.28	28.89	30.62	30.3
TRINITY_DN24080_c0_g1	IsAP2/ERF44	4.96	3.47	4.85	25.87	20.35	21.76	68.97	71.35	66.77	10.43	10.02	9.42
TRINITY_DN24714_c0_g1	IsAP2/ERF45	4.48	4.14	7.78	1.96	0.76	1.89	2.91	3.83	2.35	0	0.27	0.32
TRINITY_DN26988_c0_g1	IsAP2/ERF46	0.24	0.58	0.53	0.6	0.76	0.33	0.61	1.15	1.19	2.66	1.98	2.37
TRINITY_DN27009_c0_g2	IsAP2/ERF47	0	0	0	1.1	0	1.99	0.65	0.48	0.54	0.41	0.48	0.64
TRINITY_DN27242_c0_g1	IsAP2/ERF48	0	0.14	0	1.28	0.99	0.78	0.49	0.76	0.32	0.55	0.56	0.44
TRINITY_DN29282_c0_g1	IsAP2/ERF49	2.23	2.92	2.35	0.88	0.75	0.39	5.3	4.73	4.78	0.05	0.03	0.04
TRINITY_DN3028_c0_g1	IsAP2/ERF50	14.1	12.43	12.64	0.35	0.09	0.36	0	0	0	0.19	0.09	0.25
TRINITY_DN30508_c0_g1	IsAP2/ERF51	0.08	0.5	0.38	0.85	0.55	0.23	0.17	0.15	0	0.07	0	0.09
TRINITY_DN31145_c0_g1	IsAP2/ERF52	18.3	17.17	18.76	13.62	12	11.61	20.04	19.74	19.48	13.18	12.77	13.72
TRINITY_DN32369_c0_g1	IsAP2/ERF53	0.57	0.56	1.95	0	0	0	0.33	0	0	0	0	0
TRINITY_DN32642_c0_g2	IsAP2/ERF54	0.68	0.22	0.26	0.34	0.53	0.42	0	0.1	0.21	0.26	0	0
TRINITY_DN3270_c0_g1	IsAP2/ERF55	54.6	60.75	60.28	38.12	42.9	35.93	28.23	37.87	34.48	58.68	71.4	59.52
TRINITY_DN3318_c0_g1	IsAP2/ERF56	141.54	127.59	140.83	251.06	218.66	218.37	124.44	126.64	118.75	188.95	186.72	195.86
TRINITY_DN3318_c0_g2	IsAP2/ERF57	105.74	91.63	104.24	43.86	39.09	38.2	11.37	11.83	12.84	21.98	20.66	20.42
TRINITY_DN3322_c0_g1	IsAP2/ERF58	1.73	1.77	2.06	14.43	13.48	11.46	6.55	8	6.49	4.05	3.62	5.13
TRINITY_DN33929_c0_g1	IsAP2/ERF59	1.98	1.66	4.5	3.55	4.4	2.84	18.12	18.14	17.17	9.21	7.86	6.9
TRINITY_DN34634_c0_g1	IsAP2/ERF60	2.56	3.32	3.16	0.98	0.69	0.49	0.12	0	0.04	1.59	1.15	1.3
TRINITY_DN34761_c0_g1	IsAP2/ERF61	2.29	2.61	1.2	0	0.49	0.16	0.19	0	0.33	0.27	0.16	0
TRINITY_DN3739_c0_g1	IsAP2/ERF62	40.44	35.16	41.66	66.37	62.4	53.98	77.44	74.93	78.93	156.83	160.92	143.99
TRINITY_DN38923_c0_g1	IsAP2/ERF63	1.43	0.9	0.86	0	0.19	0.19	3.49	0.81	2.07	3.56	3.56	3.04
TRINITY_DN38967_c0_g1	IsAP2/ERF64	3.24	0	1.23	0	0	0	0	0	0	0	0	0
TRINITY_DN41015_c0_g1	IsAP2/ERF65	0.07	0.07	0	1.45	1.95	1.54	0.87	0.58	0.72	1.79	1.98	1.28
TRINITY_DN4286_c0_g1	IsAP2/ERF66	13.15	12.12	12.54	3.07	1.84	3.07	3.24	2.66	3.7	4.86	3.99	4.74
TRINITY_DN4418_c1_g1	IsAP2/ERF67	22.65	21.6	21.15	83.27	73.78	74.14	95.96	101.16	99.93	28.15	29.68	31.17
TRINITY_DN44696_c0_g1	IsAP2/ERF68	1.11	0.95	1.18	2.01	1.36	1.03	1.66	2.12	1.81	0.57	0.95	0.55
TRINITY_DN45257_c0_g1	IsAP2/ERF69	11.57	11.92	9.62	0.07	0	0	0	0.06	0	0	0	0
TRINITY_DN47131_c0_g1	IsAP2/ERF70	0.27	0.22	0.12	0.05	0.1	0.15	1.08	1.6	0.99	0.68	0.87	1.18
TRINITY_DN479_c0_g1	IsAP2/ERF71	21.44	17.2	22.04	20.67	19.18	17.41	12.79	13.5	13.26	11.69	11.23	10.83
TRINITY_DN479_c0_g2	IsAP2/ERF72	13.19	12.44	13.96	5.73	8.3	7.74	7.64	7.69	7.69	4.49	4.74	5.45
TRINITY_DN4830_c0_g1	IsAP2/ERF73	2.33	2.03	1.98	3.39	2.81	2.84	0.52	0.74	0.49	3.04	2.92	2.96
TRINITY_DN48533_c0_g1	IsAP2/ERF74	4.15	4.52	1.05	0	0	0	0	0	0	0	0	0
TRINITY_DN5033_c0_g1	IsAP2/ERF75	9.73	8.39	9.6	5.34	4.33	4.85	6.35	4.88	4.29	4.05	4.77	3.44
TRINITY_DN5046_c0_g1	IsAP2/ERF76	135.6	119.98	131.43	88.41	80	76.75	97.96	94.84	95.52	39.33	40.56	44.24
TRINITY_DN5046_c0_g3	IsAP2/ERF77	545.32	487.35	526.98	202.17	185.49	185.08	247.02	235.25	238.39	129.52	138.44	143.56
TRINITY_DN53399_c0_g1	IsAP2/ERF78	0.12	0.29	0.23	0.12	0.04	0.19	0.32	0.44	0.41	2.15	2.08	2.75
TRINITY_DN5358_c0_g1	IsAP2/ERF79	2.37	1.53	2.34	29.81	28.54	28.45	4.97	4.96	4.39	23.79	23.82	23.99
TRINITY_DN5441_c0_g1	IsAP2/ERF80	17.59	16.25	15.28	60.82	55.75	54.06	57	59.54	55.84	62.71	64.89	62.28
TRINITY_DN55991_c0_g2	IsAP2/ERF81	0.11	0	0	2.5	1.68	1.15	0.23	0.1	0.1	0.09	0.4	0.24
TRINITY_DN5762_c1_g2	IsAP2/ERF82	2.95	2.56	2.89	7.47	5.96	6.63	7.01	6.77	6.5	7.23	7.07	6.52
TRINITY_DN58791_c0_g2	IsAP2/ERF83	1.07	0.35	1.62	0	0	0	0	0	0	0	0	0
TRINITY_DN60693_c0_g2	IsAP2/ERF84	17.85	15.32	15.78	2.4	2.5	2.28	0.71	1.15	1.39	0.32	0.04	0.17
TRINITY_DN61352_c0_g1	IsAP2/ERF85	0.68	0.87	1.22	2.64	3.09	2.51	1.58	1.3	1.24	0.64	1.08	0.95
TRINITY_DN6207_c0_g1	IsAP2/ERF86	16.17	16.96	17.71	10.33	8.44	8.45	4.98	6.85	6.46	16.08	16.31	15.15
TRINITY_DN64286_c0_g1	IsAP2/ERF87	0.16	0.08	0.27	0.99	0.44	0.36	0.78	0.97	0.57	0.06	0.19	0.08
TRINITY_DN64805_c1_g1	IsAP2/ERF88	0	0	0	0.81	2.85	1.45	0.98	0	0	0.6	0	0
TRINITY_DN6682_c0_g1	IsAP2/ERF89	22.34	19.18	20.17	58.91	50.44	51.44	126.18	128.86	133.91	48.44	49.57	48.59
TRINITY_DN6763_c0_g1	IsAP2/ERF90	88.15	83.24	93.78	46.25	43.45	40.75	73.7	70.25	69.94	4.7	3.94	4.84
TRINITY_DN6763_c0_g2	IsAP2/ERF91	0	0	0	10.22	7.93	9.61	0	0	0	25.12	27.04	22.25
TRINITY_DN6819_c0_g1	IsAP2/ERF92	24.59	27.12	30.89	0.28	0.26	0.26	3.55	2.71	4.3	0.14	0	0.29
TRINITY_DN6819_c0_g3	IsAP2/ERF93	0.57	0.63	0.5	1.33	1	0.52	1.32	0.67	1.55	0.59	1.23	1.05
TRINITY_DN6837_c0_g2	IsAP2/ERF94	181.01	161.84	168.48	158.43	143.55	139.24	226.24	239.19	232.13	165.06	170.28	168.29
TRINITY_DN7213_c0_g1	IsAP2/ERF95	0.67	0.58	0.55	8.02	7.47	6.77	15.08	13.16	13.21	6.77	5.97	6.39
TRINITY_DN7248_c0_g2	IsAP2/ERF96	0.46	0.53	2.41	0.45	0.36	0.43	4.77	4.49	5.4	3.07	3.73	2.51
TRINITY_DN7366_c0_g1	IsAP2/ERF97	9.14	8.68	7.06	0	0.09	0	0.3	0	0.18	0.08	0	0
TRINITY_DN752_c1_g1	IsAP2/ERF98	37.54	32.96	36.73	158.62	142.09	131.2	12.42	11.05	14.38	116.77	113.09	109.07
TRINITY_DN7560_c0_g1	IsAP2/ERF99	0.2	0.05	0	2.85	2.51	1.97	0.2	0.49	0.36	7.22	4.99	6.65
TRINITY_DN76264_c0_g1	IsAP2/ERF100	1.95	1.09	0.83	0.37	0.11	0.23	0	0	0.11	0.09	0	0.13
TRINITY_DN79002_c0_g1	IsAP2/ERF101	1.22	0.76	0.61	3.94	3.15	2.91	0.31	0.41	0.14	0	0	0
TRINITY_DN79619_c0_g1	IsAP2/ERF102	0	0	0	1.97	0	0	0	0	0	2.85	0	0
TRINITY_DN80155_c0_g1	IsAP2/ERF103	0.62	1.82	0	0	0	0	0	0	0	0	0	0
TRINITY_DN80174_c0_g1	IsAP2/ERF104	1.32	0.43	1	0	0	0	0	0	0	0	0.4	0
TRINITY_DN8059_c0_g1	IsAP2/ERF105	23.51	19.82	21.79	33.86	28.27	29.42	5.71	6.01	5.69	4.42	3.96	4.36
TRINITY_DN8059_c1_g1	IsAP2/ERF106	64.88	55.38	59.43	22.49	19.06	18.4	7.74	9.84	8.49	7.73	7.59	9.53
TRINITY_DN8059_c1_g2	IsAP2/ERF107	10.25	7.94	11.2	2	1.68	1.34	2.1	1.63	1.9	1.25	0.74	1.06
TRINITY_DN8318_c0_g1	IsAP2/ERF108	0	0	0.08	9.71	7.61	8.13	0	0.13	0	0.33	0.31	0.3
TRINITY_DN83427_c0_g1	IsAP2/ERF109	37.9	35.24	41.88	86.72	75.23	75.42	214.81	212.7	220.18	10.85	11.65	10.36
TRINITY_DN83543_c0_g1	IsAP2/ERF110	1.73	2.11	2.06	3.09	3.38	4.08	1.34	1.4	1.8	0.24	0.28	0.16
TRINITY_DN841_c0_g1	IsAP2/ERF111	51.65	46.75	48.11	55.99	47.39	47.01	80.72	80.98	81.2	62.9	62.83	64.89
TRINITY_DN8426_c1_g1	IsAP2/ERF112	31.47	27.08	28.49	0.52	0.69	0.95	2.93	2.49	2.12	0.27	0.15	0.06
TRINITY_DN84613_c0_g1	IsAP2/ERF113	1.29	1.13	1.59	6.18	6.13	6.21	2.4	2.62	2.53	2.09	2.7	2.14
TRINITY_DN851_c2_g1	IsAP2/ERF114	33.55	27.71	30.01	41.34	34.46	34.12	19.66	19.67	18.56	9.56	9.46	10.42
TRINITY_DN88081_c0_g1	IsAP2/ERF115	58.64	41.76	50.19	0.38	0.09	0.26	0.19	0.08	0.09	0.14	0.25	0.1
TRINITY_DN8893_c0_g1	IsAP2/ERF116	34.78	29.11	32.36	75.59	68.87	61.67	17.02	18.5	18.12	73.78	72.74	67.83
TRINITY_DN9217_c0_g2	IsAP2/ERF117	174.43	159.74	174.62	70.11	62.71	70.71	134.34	152.34	144.28	77.7	75.51	70.98
TRINITY_DN9217_c1_g1	IsAP2/ERF118	81.43	73.74	81.13	203.51	176.25	181.54	198.15	201.11	194.95	253.23	255.94	248.45
TRINITY_DN93053_c0_g1	IsAP2/ERF119	1.64	2.3	3.58	1.11	1.02	0.89	2.14	2.7	1.65	0.11	0.85	0.29
TRINITY_DN93592_c0_g1	IsAP2/ERF120	0	0	0	0	0.23	0	0	0	0.94	0	0	0.82
TRINITY_DN94002_c0_g1	IsAP2/ERF121	1.93	2.29	3.07	2.16	1.8	2.88	26.07	27.91	26.73	0.6	0.86	0.42
TRINITY_DN94092_c0_g1	IsAP2/ERF122	0	0	5.96	0	0	0	0	0	0	0	0	0
TRINITY_DN9749_c0_g1	IsAP2/ERF123	63.3	55.64	62.95	13.52	12.34	13.74	13.11	13.45	12.51	1.7	2.22	2.15
TRINITY_DN10130_c0_g2	IsB3-1	34.3	28.38	31.73	47.61	40.01	40.37	16.03	17.08	15.9	43.35	43.06	42.07
TRINITY_DN10414_c0_g1	IsB3-2	2.75	2.47	1.86	0.42	0.31	1.34	0.83	0.79	0.88	0.46	0.62	0.38
TRINITY_DN10414_c0_g2	IsB3-3	7.96	5.67	6.27	18.04	16.67	16.5	7.82	6.51	6.47	10.86	11.98	10.6
TRINITY_DN10816_c1_g1	IsB3-4	3.46	4.45	3.68	6.49	6.22	6.33	0	0.07	0.12	0.03	0.23	0.35
TRINITY_DN10816_c1_g2	IsB3-5	0.84	0.74	0.85	1.04	0.61	0.61	0	0.08	0.26	0.44	0.33	0.3
TRINITY_DN10816_c1_g3	IsB3-6	0.94	0.4	1.08	0.82	0.38	0.5	0.14	1.09	0.13	0.42	0.6	0.58
TRINITY_DN10816_c1_g4	IsB3-7	2.68	1.5	2.17	0.17	0.16	0.26	0.06	0	0.1	0	0.2	0
TRINITY_DN10852_c0_g1	IsB3-8	2.18	2.5	2.07	0.76	0	0	0.43	1	0.36	0	0.33	0
TRINITY_DN11138_c0_g2	IsB3-9	2.01	1.6	2.11	0.08	0	0	0.08	0.22	0.37	0.31	0.07	0.25
TRINITY_DN1197_c0_g1	IsB3-10	19.18	18.53	21.63	34.76	30.76	31.98	30.42	31.25	31.42	31.2	29.95	29.8
TRINITY_DN12619_c0_g1	IsB3-11	21.17	13.37	18.63	14.39	13.5	14.04	5.86	5.4	5.22	3.71	2.45	2.29
TRINITY_DN12619_c0_g2	IsB3-12	10.64	9.81	8.06	15.58	13.72	13.61	7.28	7.4	8.24	6.42	5.52	6.36
TRINITY_DN12632_c1_g1	IsB3-13	2.56	2.5	2.44	0.57	0	0.41	0.06	0.06	0.21	0.05	0	0.2
TRINITY_DN13089_c0_g1	IsB3-14	12.72	12.16	12.24	0.09	0.09	0.11	0	0	0	0.07	0.08	0.06
TRINITY_DN1313_c0_g1	IsB3-15	39.63	37.79	40.77	16.83	14.31	13.47	18.55	20.46	18.29	30.63	29.89	28.5
TRINITY_DN1351_c0_g2	IsB3-16	47.42	43.24	50.05	27.91	22.17	25.01	26.46	27	27.4	41.22	38.67	40.11
TRINITY_DN14417_c0_g1	IsB3-17	1.49	0	1.69	0.52	0.47	0	0	0	0	0.39	0	0
TRINITY_DN14417_c0_g2	IsB3-18	2.73	2.7	1.99	1.08	1.14	1.26	0.85	1.47	0.91	0.53	0.55	1.86
TRINITY_DN14417_c0_g3	IsB3-19	0	0	0	0	0	0	0	0	0	1.47	0	0
TRINITY_DN14417_c0_g4	IsB3-20	1.54	0	0	0	0	0.75	0	0	0	0.62	0	0
TRINITY_DN15270_c0_g1	IsB3-21	4.83	3.49	4.42	1.91	1.68	1.29	2.28	1.72	1.56	2.62	2.83	3.35
TRINITY_DN15352_c0_g2	IsB3-22	6.94	9.07	9.14	9.03	7.24	7.91	11.33	13.08	11.14	6.63	7.52	7.31
TRINITY_DN15958_c0_g2	IsB3-23	1.03	0.51	0.44	1.17	1.08	0.96	1.47	0.46	0.83	0	0.23	0.14
TRINITY_DN16155_c0_g1	IsB3-24	2.53	4.94	3.1	3.04	1.51	0.51	0.4	1.02	0.87	0.36	0.35	0.45
TRINITY_DN19276_c0_g1	IsB3-25	18.59	14.67	17.43	17.11	14.5	14.03	17.56	16.64	16.77	23.77	22.9	25.09
TRINITY_DN2278_c0_g1	IsB3-26	0.71	1.39	1.37	22.44	21.63	20.56	15.53	15.35	13.9	13.57	13.8	13.62
TRINITY_DN2278_c1_g1	IsB3-27	1.05	1.2	1.48	2.45	4.01	2.67	0.5	1.04	0.3	3.6	3.43	3.53
TRINITY_DN2278_c1_g2	IsB3-28	1.23	1.19	0.82	0.45	0.21	0.62	1.73	0.98	1.01	2.17	1.97	1.48
TRINITY_DN25157_c0_g1	IsB3-29	1	1.13	2.28	0	0	0	0	0	0	0	0.13	0
TRINITY_DN29541_c0_g1	IsB3-30	0.61	1.2	1.4	0	0	0	0	0	0	0.97	0	0
TRINITY_DN29541_c0_g2	IsB3-31	0	0.92	0.35	1.28	1.45	0.88	0	0	0	0.24	0	0.72
TRINITY_DN29541_c1_g1	IsB3-32	0	0	0	0	2.37	0	0	0	0	4	5.18	0
TRINITY_DN2989_c0_g1	IsB3-33	12.49	12.69	12.05	39.99	34.43	34.57	28.84	30.27	32.67	33.66	32.21	32.55
TRINITY_DN3039_c0_g1	IsB3-34	19.27	18.07	18.21	28.66	26.66	23	15.9	16.61	15.46	25.58	27.52	25.92
TRINITY_DN3319_c1_g1	IsB3-35	4.44	2.87	2.33	2.95	2.23	1.91	0.91	3.68	3.68	3.31	3.65	4.28
TRINITY_DN33548_c0_g1	IsB3-36	0	0	0	1.58	0.85	1.68	0.08	0	0.08	0	0.15	0.43
TRINITY_DN36521_c0_g3	IsB3-37	7.63	0	2.22	0	0	0	0	0	0	0	0	0
TRINITY_DN38909_c0_g1	IsB3-38	0	0.07	0.08	0.14	0.13	0.19	2.31	2.88	1.86	0.16	0.12	0
TRINITY_DN3913_c0_g1	IsB3-39	26.89	23.75	24.31	19.01	15.33	16.59	32.22	33.15	33.49	15.69	14.1	15.67
TRINITY_DN3913_c0_g2	IsB3-40	4.67	3.55	4.68	13.03	9.81	10.57	5.32	6.45	4.82	13.18	13.94	16.08
TRINITY_DN39978_c0_g1	IsB3-41	0.2	0.27	0.39	3.62	2.79	3.08	0	0	0.06	0.21	0.12	0
TRINITY_DN43143_c0_g1	IsB3-42	0.35	0.17	0.4	0.26	0.24	0.08	0	0	0.08	0.95	1.01	0.18
TRINITY_DN43690_c0_g2	IsB3-43	1.5	1.75	1.77	0	0	0.19	0.21	0	0.05	0.24	0.05	0.16
TRINITY_DN43690_c1_g1	IsB3-44	1.56	2.28	0.89	1.69	0	0	0	0	0	0	0	0
TRINITY_DN4823_c0_g1	IsB3-45	18.98	15.77	16.59	2.43	1.92	2.71	7.29	7.68	7.37	9.82	11.28	10.13
TRINITY_DN54115_c1_g3	IsB3-46	2.18	3.34	2.25	11.6	10.77	9.42	5.38	7.23	6.16	4.24	5.11	4.75
TRINITY_DN57091_c0_g1	IsB3-47	0.27	0.18	0.52	0.82	0.68	0.67	0	0.08	0	0.49	0.24	0.19
TRINITY_DN57091_c0_g3	IsB3-48	6.97	0	0	0	0	0	0	0	0	0	0	0
TRINITY_DN58224_c0_g1	IsB3-49	0	0	0.52	0.16	0.43	0	0	0	0	0.48	1.09	1.16
TRINITY_DN58791_c0_g1	IsB3-50	0.79	1.31	0.9	0	0	0.12	0	0	0	0	0	0
TRINITY_DN87439_c0_g1	IsB3-51	1.81	1.6	3.29	0.54	0	0.25	0.2	0.12	0	0.16	0.3	0.07
TRINITY_DN9130_c0_g1	IsB3-52	22.17	21.51	21.91	0.53	0.46	0.51	0.58	0.17	0.53	0.38	0.58	0.5
TRINITY_DN9209_c0_g1	IsB3-53	1.62	1.31	1.07	0.46	0.21	0.17	0.41	0.36	0.42	0.53	0.49	0.47
TRINITY_DN9340_c0_g1	IsB3-54	1.52	1.05	1.34	2.14	1.74	1.65	0	0	0	3.23	3.11	2.78
TRINITY_DN139_c0_g1	IsBBR-BPC1	38.17	34.08	36.05	62.69	55.82	54.41	56.09	58.77	56.9	68.52	71.94	70.47
TRINITY_DN139_c0_g2	IsBBR-BPC2	9.93	8.93	9.76	32.03	26.99	26.37	30.52	26.99	29.99	32.24	34.34	30.75
TRINITY_DN24298_c0_g1	IsBBR-BPC3	3.46	3.85	3.86	15.24	10.89	12.27	8	7.58	7.24	11.55	10.15	10.74
TRINITY_DN306_c0_g1	IsBBR-BPC4	44.4	40.84	44.07	46.99	43.47	40.63	50.4	55.73	53.68	34.12	32.75	33.93
TRINITY_DN842_c0_g1	IsBBR-BPC5	10.72	10.24	10.78	12.73	9.55	9.75	11.21	10.82	10.48	12.46	12.07	13.06
TRINITY_DN842_c0_g3	IsBBR-BPC6	18.96	14.2	14.75	22.48	17.42	19.47	20.13	17.75	19.26	15.75	16.95	15.41
TRINITY_DN10201_c0_g1	IsBES1-1	19.26	18.32	18.03	34.98	30.58	31.16	38.94	37.65	37.24	49.24	50.26	49.61
TRINITY_DN30416_c0_g1	IsBES1-2	0.96	0.39	0.32	6.01	6.27	4.22	0.95	0.95	0.97	3.47	3.45	4.26
TRINITY_DN30416_c1_g2	IsBES1-3	21.03	19.53	19.77	27.39	23.69	22.96	27.11	28.78	27.24	23.31	23.28	21.48
TRINITY_DN5365_c0_g1	IsBES1-4	50.95	49.21	51.18	50.27	46.68	43	72.88	72.38	74.2	57.75	60.35	57.63
TRINITY_DN10385_c0_g1	IsbHLH1	12.79	11.29	12.57	12	7.71	10.3	6.44	7.41	7.96	18.08	14.08	17.3
TRINITY_DN10709_c0_g1	IsbHLH2	3.26	3.34	2.77	1.03	1.54	1.51	0.69	0.41	0.29	0.22	0.25	0.32
TRINITY_DN10760_c0_g1	IsbHLH3	0.72	0.98	2.05	1.27	0.59	0.58	0.36	0.72	0.91	0	0	0
TRINITY_DN10760_c0_g2	IsbHLH4	4.24	3.87	6.27	0	0	0	0.21	0.37	0.19	6.23	6.05	4.64
TRINITY_DN10800_c0_g1	IsbHLH5	19	15.95	19.19	0	0	0	0	0	0	0.06	0	0
TRINITY_DN10947_c0_g1	IsbHLH6	23.94	20.64	22.4	45.15	40.62	39.54	64.15	66.76	65.43	32.76	31.07	31.11
TRINITY_DN10947_c0_g2	IsbHLH7	0.19	0.13	0.21	15.94	13.85	11.89	4.69	5.59	5.05	2.62	2.12	2.73
TRINITY_DN11926_c0_g1	IsbHLH8	0.41	0.48	0.55	1.42	1.6	1.22	3.23	3.97	2.71	0.05	0.36	0.21
TRINITY_DN1204_c0_g1	IsbHLH9	13.96	11.84	15	14.54	11.73	12.2	14.19	16.23	15.55	13.02	13.66	12.94
TRINITY_DN1216_c0_g1	IsbHLH10	49.36	45.99	51.26	55.61	50.51	47.92	27.59	29.58	29.24	93.68	91.61	91.51
TRINITY_DN12255_c0_g1	IsbHLH11	7.69	6.05	6.88	68.17	61.4	60.57	8.85	10.49	8.45	3.43	3.71	3.8
TRINITY_DN12288_c0_g2	IsbHLH12	3.31	2.67	3.66	7.85	5.95	5.85	3.85	2.79	2.32	3.48	3.06	4.01
TRINITY_DN12725_c0_g1	IsbHLH13	0.03	0	0	2.98	1.68	1.43	2.99	4.33	3.2	0.16	0.03	0.37
TRINITY_DN12762_c0_g1	IsbHLH14	0	0	0	2.31	1.62	0.98	0.17	0.3	0.05	0.04	0	0.06
TRINITY_DN13220_c0_g1	IsbHLH15	3.08	2.63	4.29	0.95	0.75	1.07	0	0.09	0.03	0.38	0.33	0.17
TRINITY_DN13609_c0_g2	IsbHLH16	0.37	1.23	0.48	2.17	2.57	2.54	0.92	0.52	1.14	1.07	1.74	1.14
TRINITY_DN146_c0_g1	IsbHLH17	37.71	33.78	35.15	13.56	11.19	9.84	11.39	12.51	12.07	1.49	2.1	2.13
TRINITY_DN14718_c0_g2	IsbHLH18	8.57	7.01	7.38	0.04	0.17	0.2	0.04	0	0.16	0.95	1.08	0.78
TRINITY_DN14862_c0_g1	IsbHLH19	0.79	1.25	1.19	0.91	0.59	0.66	0.19	0.12	0.02	0.68	0.61	0.93
TRINITY_DN15457_c1_g1	IsbHLH20	7.77	7.04	7.62	6.42	4.84	5.73	5.23	5.96	5.05	5.94	6.15	7.09
TRINITY_DN15499_c0_g1	IsbHLH21	0.66	0.76	1.05	0.34	0.09	0	0	0	0	4.19	3.92	4.36
TRINITY_DN15803_c0_g1	IsbHLH22	3.83	3.18	2.95	1.95	1.38	1.03	1.49	1.06	1.58	2.58	2.81	2.51
TRINITY_DN16437_c0_g1	IsbHLH23	25.51	21.3	24.7	16.42	13.41	16.83	14.35	16.18	15.97	33.36	34.17	32.72
TRINITY_DN16564_c0_g1	IsbHLH24	0.16	0.29	0.49	0.59	0.82	0.57	3.42	3.51	3.44	2.06	2.1	2.18
TRINITY_DN1709_c0_g1	IsbHLH25	46.56	40.28	46.93	63.64	54.03	53.26	36.35	37.24	37.59	58.31	60.06	58.96
TRINITY_DN18547_c0_g1	IsbHLH26	66.25	65.12	66.54	50.02	45.44	45.24	48.96	48.82	49.58	64.91	65.21	64.71
TRINITY_DN18781_c0_g3	IsbHLH27	1.75	2.24	1.58	1.02	1.51	1.24	10.66	10.1	9.66	0.39	0.42	0.52
TRINITY_DN18781_c0_g4	IsbHLH28	0	0.34	1.97	0	0.32	0.32	0.18	0.16	0	0.27	0.46	0.19
TRINITY_DN19743_c0_g1	IsbHLH29	4.33	4.12	3.44	0.77	0.91	0.78	0.62	0.43	0.73	6.68	4.15	5.35
TRINITY_DN19797_c0_g1	IsbHLH30	0.39	0.18	0.38	1.34	0.71	1.23	0.56	0.54	0.44	0.42	0.38	0.43
TRINITY_DN20239_c0_g1	IsbHLH31	14.36	15.24	15.03	13.96	15.14	13.02	16.73	17.77	19.35	22.34	23.21	23.25
TRINITY_DN21269_c0_g1	IsbHLH32	4.25	4.85	5.95	1.86	3.04	2.02	2.17	3.35	1.73	3.32	2.44	2.91
TRINITY_DN23346_c0_g2	IsbHLH33	1.66	1.89	1.63	4	2.41	2.32	2.63	3.45	2.24	2.11	1.4	2.93
TRINITY_DN2527_c0_g1	IsbHLH34	56.28	51.94	52.55	61.33	51.38	54.78	50.35	53.81	54.96	62.21	64.55	61.89
TRINITY_DN25599_c0_g1	IsbHLH35	0.15	0.14	0.21	0.82	0.95	0.86	1.75	1.96	1.73	0.11	0.13	0
TRINITY_DN2900_c0_g1	IsbHLH36	10.53	9.64	11.3	1.25	0.78	1.15	0.43	0.46	0.56	8.09	8.13	8.22
TRINITY_DN29524_c0_g1	IsbHLH37	35.42	33.98	34.86	30.33	25.03	25.26	29.9	31.02	31.52	36.04	36.37	35.64
TRINITY_DN31134_c0_g1	IsbHLH38	0.38	0.63	0.97	0.6	0.59	0.47	0.75	0.49	0.58	2.31	1.65	1.75
TRINITY_DN34175_c0_g1	IsbHLH39	1.17	0.93	1.6	0.24	0.22	0	0.12	0.1	0	0.09	0.31	0.37
TRINITY_DN34182_c0_g1	IsbHLH40	3.73	2.19	2.26	0	0	0	0	0	0	0	0.04	0.04
TRINITY_DN35780_c0_g1	IsbHLH41	1.09	0.32	0.62	0	0	0	0	0	0	0	0	0
TRINITY_DN36237_c0_g1	IsbHLH42	0	0	0	0.17	0	0.46	1.18	0.6	0.99	0	0	0
TRINITY_DN407_c1_g1	IsbHLH43	3.12	2.65	2.78	14.5	19.09	17.29	1.58	1.6	1.92	0.15	0.12	0.15
TRINITY_DN41687_c0_g1	IsbHLH44	3.94	2.56	3.8	1.14	2.06	0.99	2.75	1.42	1.46	2.98	2.77	2.14
TRINITY_DN4452_c0_g2	IsbHLH45	8.68	6.22	6.55	4.35	4.55	4.14	6.46	6.72	7.43	5.52	4.21	4.14
TRINITY_DN45721_c0_g1	IsbHLH46	3.02	3.51	4.23	0	0	0	0.09	0.08	0.08	0	0	0
TRINITY_DN4802_c0_g2	IsbHLH47	6.42	4.53	5.75	3.94	3.48	2.75	0.1	0.09	0.53	1.48	1.38	1.09
TRINITY_DN4802_c0_g3	IsbHLH48	7.18	6.56	7.42	11.92	10.2	9.26	13.67	14.21	13.47	13.04	13.41	12.38
TRINITY_DN49072_c0_g2	IsbHLH49	0.2	0.14	0.23	1.1	0.96	0.95	0	0	0.19	0.27	0.24	0.07
TRINITY_DN4_c1_g1	IsbHLH50	82	70.27	78.6	2.72	2.46	2.12	1.46	1.82	1.25	12.1	11.54	11.79
TRINITY_DN5009_c0_g1	IsbHLH51	60.18	54.42	61.35	2.7	2.87	2.66	3.73	3.87	3.55	4.71	4.32	5.09
TRINITY_DN5012_c0_g1	IsbHLH52	7.04	5.34	6.02	36.57	29.87	29.77	5.87	6	6.33	13.87	15.07	14.7
TRINITY_DN5237_c0_g2	IsbHLH53	69.27	68.32	67.36	51.19	43.39	43.23	42.02	46.68	44.77	48.9	47.01	47.67
TRINITY_DN5423_c0_g2	IsbHLH54	12.71	10.48	11.49	0.87	1.08	0.76	0.28	0.38	0.33	0.48	0.57	0.78
TRINITY_DN55341_c0_g1	IsbHLH55	2.26	0	1.54	0	0	0	0	0	0	0	0	0
TRINITY_DN5904_c0_g2	IsbHLH56	14.45	14.55	13.86	5.86	4.91	4.46	4.27	4.34	4.81	5.19	5.63	5.15
TRINITY_DN5904_c1_g1	IsbHLH57	37.03	33.13	36.53	5.28	5.53	4.58	6.5	6.67	6.32	9.86	10.5	9.52
TRINITY_DN60264_c0_g1	IsbHLH58	2.02	1.71	1.37	0	0.07	0	0	0	0	0.12	0	0
TRINITY_DN6066_c1_g1	IsbHLH59	6.95	5.56	6.82	8.77	6.94	6.89	11.16	10.72	11.47	10.66	10.73	11.19
TRINITY_DN6174_c0_g2	IsbHLH60	22.03	20.82	20.44	0	0.38	0.15	0.16	0	0.13	0.38	0.49	0.58
TRINITY_DN6281_c0_g2	IsbHLH61	6.84	5.7	6.68	18.82	16.3	16.17	18.28	19.73	16.99	10.56	11.05	9.16
TRINITY_DN6406_c3_g1	IsbHLH62	57.05	54.24	58.77	32.91	28.39	27.66	39.46	39.15	38.43	44.63	42.95	43.87
TRINITY_DN66139_c0_g4	IsbHLH63	39.85	34.42	39.57	5.59	5.16	4.81	6.02	7.51	6.03	8.86	9.39	9.57
TRINITY_DN6707_c0_g1	IsbHLH64	0.17	0.19	0.25	41.1	36.61	38.58	4.48	4.56	4.49	8.42	7.45	7.81
TRINITY_DN67140_c0_g1	IsbHLH65	0	0.35	0.1	0.09	0.25	0.17	0.27	0.16	0.25	0.21	0.08	0.47
TRINITY_DN67146_c0_g1	IsbHLH66	1.34	1.99	1.68	0	0	0	0	0	0	0.1	0	0
TRINITY_DN6861_c0_g1	IsbHLH67	9.49	9.77	7.75	3.51	3.15	2.86	1.58	0.99	1.97	6.96	8.63	7.37
TRINITY_DN69817_c0_g1	IsbHLH68	6.06	5.43	4.14	0.16	0	0.15	0	0.06	0.06	0.32	0.31	0.2
TRINITY_DN71582_c0_g1	IsbHLH69	0.19	0.06	0	1.45	1.41	1.39	0.56	0.67	0.34	0.54	0.28	0.2
TRINITY_DN72638_c0_g1	IsbHLH70	0	0	0	1.42	1.59	1.98	0	0	0	0	0	0
TRINITY_DN72866_c0_g2	IsbHLH71	0.99	0.97	1.13	0	1.86	0.47	1.23	1.84	0	0	0	0
TRINITY_DN7387_c0_g1	IsbHLH72	1.67	1.44	1.44	7.83	8.02	8.95	3.93	4.36	4.26	7.64	7.31	7.59
TRINITY_DN7396_c0_g1	IsbHLH73	1.36	1.05	1.64	9.07	8.32	6.77	6.05	5.66	6.43	4.26	2.79	5
TRINITY_DN7506_c0_g1	IsbHLH74	2.82	1.74	2.97	2.74	3.09	3.68	1.89	2.17	2.01	2.84	3.68	4.08
TRINITY_DN7506_c0_g2	IsbHLH75	2.38	2.85	2.99	1.03	0.82	1.57	0.38	0.3	0.57	1.06	1.34	0.85
TRINITY_DN77901_c0_g1	IsbHLH76	1.33	0.6	1.38	0	0	0	0	0	0	0	0	0
TRINITY_DN80305_c0_g1	IsbHLH77	0.82	1.14	0.94	0	0	0	0	0	0	0	0	0
TRINITY_DN8101_c0_g1	IsbHLH78	9.74	8.75	9.43	21.3	21.46	17.55	13.08	12.4	12.75	17.37	17.09	17.06
TRINITY_DN81229_c0_g1	IsbHLH79	1.51	1.13	1.3	1.91	2.05	1.9	0.91	1.15	0.69	0.94	1.62	1.43
TRINITY_DN83254_c0_g1	IsbHLH80	9.47	9.57	9.96	0.06	0.18	0.24	0.25	0.03	0.06	0.02	0.06	0
TRINITY_DN8407_c0_g1	IsbHLH81	0.05	0	0.11	9.16	7.35	5.52	14.2	13.28	13.36	5.25	4.64	4.7
TRINITY_DN87083_c0_g1	IsbHLH82	0.06	0	0	7.41	8.19	7.57	1.39	1.15	1.65	0.86	1.14	0.91
TRINITY_DN8961_c0_g1	IsbHLH83	0.21	0.21	0.05	7.49	5.71	6.02	1.68	2.52	2.31	1.37	1.19	1.27
TRINITY_DN8961_c0_g2	IsbHLH84	0.63	0.62	0.26	0.5	0.42	0.58	0.09	0.28	0.04	1.15	1.31	0.51
TRINITY_DN9175_c1_g1	IsbHLH85	0.29	0.63	0.39	1.47	0.91	0.99	5.61	5.76	5.34	0.23	0.3	0.45
TRINITY_DN92_c0_g2	IsbHLH86	4.33	4.2	5.83	17.32	15.17	12.84	45.85	45.51	45.21	13.97	13.76	12.35
TRINITY_DN9356_c0_g1	IsbHLH87	0.89	0.83	0.79	13.17	10.71	11.57	2.09	1.94	2.69	1.41	1.18	1.73
TRINITY_DN9923_c0_g1	IsbHLH88	6.19	5.44	5.43	0.4	0.53	0.3	0.69	0.93	1.34	1.3	1.56	1.01
TRINITY_DN13236_c0_g1	IsbZIP1	0	0	0.22	3.29	3.87	3.11	0.7	0.79	1.18	3.76	3.5	3.02
TRINITY_DN13677_c0_g3	IsbZIP2	0.35	0.35	0.05	5.54	3	3.13	0.7	1.21	0.8	0.47	1.17	0.72
TRINITY_DN13750_c0_g2	IsbZIP3	0.52	0.26	0.4	0.26	0.24	0.08	0.18	0.31	0.24	0.2	0.39	0
TRINITY_DN1510_c0_g2	IsbZIP4	121.18	108.97	117.03	51.56	43.05	40.72	63.79	70.29	64.28	83.5	86.06	87.44
TRINITY_DN15221_c0_g1	IsbZIP5	9.29	7.88	9.83	5.39	5.48	5.32	9.23	8.82	9.32	1.06	0.94	1.26
TRINITY_DN17489_c0_g1	IsbZIP6	2.36	1.73	0.67	0	0	0	0.74	0.55	0	0	0	0.74
TRINITY_DN18289_c0_g1	IsbZIP7	0.23	0.23	0.53	4.85	3.27	3.47	3.25	3.55	4.97	2.36	2.6	1.61
TRINITY_DN18289_c0_g2	IsbZIP8	0.17	0.34	0.4	0.18	0.33	0.65	0.75	0.47	0.66	0.41	0.47	0
TRINITY_DN18289_c1_g2	IsbZIP9	12.73	13.24	13.45	10.52	9.3	9.19	16.75	17.91	17.26	12.4	12.32	10.9
TRINITY_DN20108_c0_g3	IsbZIP10	0.8	1.74	0.91	0	0	0	0	0	0	0	0	0
TRINITY_DN20334_c0_g2	IsbZIP11	0	0.89	1.54	0	0	0	0	0	0	0	0	0
TRINITY_DN20349_c0_g4	IsbZIP12	1.68	0.71	1.63	0	0	0	0	0	0	0.19	0	0
TRINITY_DN22198_c0_g2	IsbZIP13	1.57	0.69	0.99	0.09	0.16	0.08	0	0	0	0.54	0	0.37
TRINITY_DN2232_c0_g1	IsbZIP14	71.09	67.64	75.1	54.9	49.05	51.68	58.41	61.39	58	42.67	41.59	43.31
TRINITY_DN22722_c0_g1	IsbZIP15	73.47	65.82	71.66	41.16	35.74	35.95	26.1	28.05	28.01	33.13	35.47	32.99
TRINITY_DN23036_c0_g1	IsbZIP16	0	0	0	2.3	1.08	0.81	0	0	0	0	0	0
TRINITY_DN23624_c0_g3	IsbZIP17	0.97	1.45	1.38	0	0	0	0	0	0	0	0	0
TRINITY_DN2442_c0_g2	IsbZIP18	58.22	49.71	52.26	18.06	16.84	15.45	34.31	38.72	35.98	19.73	18.21	17.31
TRINITY_DN24450_c0_g1	IsbZIP19	0.69	1.37	1.89	0	0	0	0	0	0	0	0	0
TRINITY_DN25904_c0_g2	IsbZIP20	2.57	3.55	3.14	16.63	16.58	13.81	10.69	11.54	10.08	7.29	6.8	5.71
TRINITY_DN27560_c0_g1	IsbZIP21	1.3	0.8	0.92	0	0	0	0	0	0	0	0	0
TRINITY_DN29032_c0_g1	IsbZIP22	0	0	0	0	0	0	0	0	0	0.54	1.26	0
TRINITY_DN2963_c1_g1	IsbZIP23	0	0	0	0	0.87	0	0	0	0	2.19	0	0
TRINITY_DN30069_c0_g1	IsbZIP24	3.08	3.68	3.48	0	0	0	0	0	0	0.43	0.33	0
TRINITY_DN30069_c0_g2	IsbZIP25	0	0	0	0	0	0	0	0	0	0.98	0.8	1.05
TRINITY_DN30069_c0_g6	IsbZIP26	1.92	1.13	0	0	0	0	0	0	0	0	0	0
TRINITY_DN3166_c0_g1	IsbZIP27	78.45	74.28	81.61	43.05	39.67	38.79	38.7	42.66	39.03	50.22	49.17	49.92
TRINITY_DN31856_c0_g1	IsbZIP28	0	0	0	0	0	0	1.52	0.39	0	0.66	0.77	0
TRINITY_DN33259_c0_g3	IsbZIP29	2.66	1.77	1.97	0	0	0	0	0	0	0	0	0
TRINITY_DN33381_c0_g2	IsbZIP30	0.63	1.55	0.72	0	0	0	0	0	0	0	0	0
TRINITY_DN33398_c0_g1	IsbZIP31	3.34	2.09	2.95	0	0	0	0	0	0	0.02	0	0.03
TRINITY_DN34582_c0_g2	IsbZIP32	2.98	0.74	1.48	0	0	0	0	0	0	0	0	0
TRINITY_DN35446_c0_g1	IsbZIP33	2.1	1.3	0.45	0	0	0	0	0	0	0	0	0
TRINITY_DN37495_c0_g3	IsbZIP34	0	0	0	2.01	1.29	0.92	0	0	0	0	0	0
TRINITY_DN37887_c0_g1	IsbZIP35	3.56	2.86	3.2	0.31	0.21	0.35	0.08	0.14	0.14	0.18	0	0.16
TRINITY_DN38483_c0_g2	IsbZIP36	0.36	0.72	0.28	0.12	0.91	0.11	0.25	0	0	0	0.22	0.13
TRINITY_DN39838_c0_g2	IsbZIP37	1.41	1.33	1.73	0	0	0	0	0	0	0.05	0	0.07
TRINITY_DN40832_c0_g2	IsbZIP38	1.64	0.8	1.87	0	0	0	0	0	0	0	0	0
TRINITY_DN41456_c1_g3	IsbZIP39	1.18	1.7	1.75	0	0	0	0	0	0	0	0	0
TRINITY_DN41880_c0_g1	IsbZIP40	0	0	0	0.63	1.68	1.22	0	0	0	0	0	0
TRINITY_DN43211_c0_g1	IsbZIP41	13.42	11.21	12.74	16.04	15.09	15.52	11.85	11.02	11.85	34.43	34.22	31.91
TRINITY_DN44567_c0_g1	IsbZIP42	0.92	1.25	1.05	0	0	0	0	0	0	0	0	0
TRINITY_DN4471_c0_g1	IsbZIP43	28.07	26.86	31.51	153.4	139.89	126.75	136.97	141.76	137.11	42.57	44.12	46.27
TRINITY_DN4553_c0_g2	IsbZIP44	61.22	56.02	61.24	56.62	48.79	49.68	25.63	26.15	25.55	36.13	37.12	35.26
TRINITY_DN45899_c0_g3	IsbZIP45	0.54	1.42	1.43	0	0	0	0	0	0	0	0	0
TRINITY_DN47046_c0_g1	IsbZIP46	0	0	0	1.9	1.63	0	0	0	0	0	0	0
TRINITY_DN47089_c0_g1	IsbZIP47	0.85	1.4	1.45	0.29	0.4	1.05	0	0	0	0.11	0	0.3
TRINITY_DN47685_c0_g1	IsbZIP48	0.69	0.51	0.39	0	0	0	0	0	0	0	0	0
TRINITY_DN47762_c0_g1	IsbZIP49	0	2.73	1.61	0	0	0	0	0	0	0	0	0
TRINITY_DN47762_c1_g2	IsbZIP50	0.98	0.91	0.88	0	0	0	0	0	0	0	0	0
TRINITY_DN51324_c0_g1	IsbZIP51	2.42	1.74	2.19	0	0	0	0	0	0	0	0	0
TRINITY_DN51643_c0_g1	IsbZIP52	1	2.43	2.41	0.56	0.52	0.31	0	0.2	0.51	0.17	0.1	0.24
TRINITY_DN53902_c0_g1	IsbZIP53	1.95	0.38	0	0	0	0	0	0	0	0	0	0
TRINITY_DN55127_c0_g2	IsbZIP54	1.3	1.92	2.21	0	0	0	0	0	0	0	0	0
TRINITY_DN55127_c1_g4	IsbZIP55	1.7	1.13	0.97	0	0	0	0	0	0	0	0	0
TRINITY_DN55254_c0_g2	IsbZIP56	1.54	2.17	1.5	0	0	0	0	0	0	0	0	0
TRINITY_DN55701_c0_g2	IsbZIP57	0	0	0	0	0	0	0	0	0	0.94	0	0
TRINITY_DN57341_c1_g1	IsbZIP58	10.49	5.14	3.09	0	0	0	0	0	0	0	0	0
TRINITY_DN5944_c0_g1	IsbZIP59	24.06	20.43	24.9	24.21	24.5	20.23	19.72	19.43	21.65	22.36	23.43	21.31
TRINITY_DN6037_c1_g1	IsbZIP60	23.34	20.62	22.03	46.16	42.38	41.29	83.95	87.24	84.27	48.34	48.28	48.24
TRINITY_DN62638_c0_g1	IsbZIP61	52.39	47.73	51.46	4.88	4.12	4.71	5.23	8.6	6.81	8.33	7.27	7.74
TRINITY_DN64285_c0_g1	IsbZIP62	1.56	2.5	2.19	0	0	0	0	0	0	0	0	0
TRINITY_DN64293_c0_g1	IsbZIP63	0	0	1.33	0	0	0	0	0	0	1.38	1.09	3.66
TRINITY_DN66634_c1_g1	IsbZIP64	1.53	0.44	0.5	0.47	1.25	0	0.55	0.83	0	0.84	0	0.54
TRINITY_DN6767_c0_g1	IsbZIP65	31.11	27.99	32.65	12.63	11.36	12.18	15.74	15.21	18.04	13.18	15.01	15.81
TRINITY_DN6767_c0_g2	IsbZIP66	5.73	4.45	6.54	10.51	8.54	7.88	8.8	7.65	10.29	6.43	5.9	5.44
TRINITY_DN6789_c0_g1	IsbZIP67	21.18	17.78	20.95	10.84	11.04	11.45	8.68	7.11	7.06	3.98	5.06	4.11
TRINITY_DN6793_c0_g1	IsbZIP68	31.55	27.62	30.83	37.61	31.4	31.62	25.76	24.84	27.69	27.41	26.58	27.76
TRINITY_DN69581_c0_g1	IsbZIP69	2.96	1.7	2.8	0	0	0	0	0	0	0	0	0
TRINITY_DN7248_c0_g1	IsbZIP70	4.6	4.65	3.99	5.02	5.23	5.55	7.19	7.33	7.48	17.87	10.63	13.43
TRINITY_DN7248_c0_g3	IsbZIP71	14.48	13.93	16.12	34.16	30.31	29.99	32.18	30.81	30.32	35.21	32.35	35.68
TRINITY_DN74937_c0_g2	IsbZIP72	0.31	0.92	2.12	0	0	0	0	0	0	0	0	0
TRINITY_DN7509_c0_g1	IsbZIP73	21.74	20.91	21.46	224.52	194.91	188.08	70.47	78.07	73.78	160.97	156.24	158.05
TRINITY_DN7509_c0_g2	IsbZIP74	18.92	18.02	17.15	194.53	162.16	167.45	186.04	190.37	184.6	144.81	139.63	138.09
TRINITY_DN7509_c1_g2	IsbZIP75	1.87	1.32	1.4	6.28	4.27	5.05	5.39	4.6	5.85	4.86	4.53	5.44
TRINITY_DN75966_c0_g2	IsbZIP76	0	0	0	1.65	0.73	0	0	0	0	0	0	0
TRINITY_DN76284_c0_g1	IsbZIP77	4.27	2.09	4.99	0	0	0	0	0	0	0	0	0
TRINITY_DN7637_c0_g1	IsbZIP78	24.31	21.39	22.93	25.9	24.03	22.18	27.37	30.23	27.95	39.73	37.71	38.07
TRINITY_DN78608_c0_g1	IsbZIP79	0	0	0	0.27	0	0.97	0	0	0	0	0	0
TRINITY_DN8010_c0_g3	IsbZIP80	8.92	7.86	7.7	13.73	11.08	10.56	7.36	8.93	7.16	8.46	8.89	8.97
TRINITY_DN84467_c0_g1	IsbZIP81	19.75	15.72	16.32	10.55	9.62	8.94	6.07	8.26	7.59	2.13	2.5	2.53
TRINITY_DN85606_c0_g1	IsbZIP82	9.39	0	0	0	0	0	0	0	0	0	0	0
TRINITY_DN85765_c0_g1	IsbZIP83	1.45	0	0.83	0	0	0	0	0	0	0	0	0
TRINITY_DN86381_c0_g1	IsbZIP84	0	0	8.62	0	0	0	0	0	0	0	0	0
TRINITY_DN87181_c0_g1	IsbZIP85	0.35	0.69	0	0	0	0	0	0	0.34	0.27	0.32	0.41
TRINITY_DN90575_c0_g1	IsbZIP86	0.26	0.13	0.22	154	140.64	141.45	2.37	2.06	1.35	34.11	34.03	29.73
TRINITY_DN9147_c0_g1	IsbZIP87	20.2	19.02	20.62	44.28	41.6	42.19	51.09	53.67	52.93	48.07	45.22	49.05
TRINITY_DN9156_c0_g1	IsbZIP88	93.12	84.41	90.89	43.85	38.89	41.1	41.35	37.17	39.99	53.61	52.5	49
TRINITY_DN91601_c0_g1	IsbZIP89	2.89	0.94	0.55	0	0	0	0.59	0	0	0	0	0
TRINITY_DN92009_c0_g1	IsbZIP90	0	0	0	0.93	3.24	0	0	0	0	0	0	0
TRINITY_DN92890_c0_g1	IsbZIP91	0	7.06	2.82	0	0	0	0	0	0	0	0	0
TRINITY_DN93585_c0_g1	IsbZIP92	0.74	0	0	0.8	0.7	0	0	0	0	0	0	1.93
TRINITY_DN1027_c0_g1	IsC2C2-1	29.81	27.85	32.86	0	0	0	0	0	0	0	0	0
TRINITY_DN1116_c0_g1	IsC2C2-2	27.24	24.2	28.07	36.58	32.03	33.21	29.14	29.17	26.2	29.38	31.74	33.36
TRINITY_DN11817_c0_g2	IsC2C2-3	4.43	2.35	1.27	2.46	2.27	2.58	0.8	1.56	0.99	1.25	1.54	1.56
TRINITY_DN12367_c0_g1	IsC2C2-4	1.68	1.34	0.61	0	1.22	0.19	0.49	0.11	0.72	0.1	0.11	0.27
TRINITY_DN1299_c0_g1	IsC2C2-5	2.79	2.65	3.62	2.52	2.96	2.51	0.9	0.78	0.61	6.96	7.95	7.7
TRINITY_DN1299_c0_g2	IsC2C2-6	0.16	0.05	0.12	7.74	7.24	6.67	2.88	2.98	2.6	1.16	0.89	1.21
TRINITY_DN1299_c0_g3	IsC2C2-7	0.68	0.51	0.73	25.57	23.53	23.37	11.36	12.28	11.45	7.47	8.08	7.94
TRINITY_DN1299_c0_g4	IsC2C2-8	6.43	6.03	7.39	16.91	14.8	14.59	10.35	9.2	10.67	38.12	38.64	40.63
TRINITY_DN1299_c1_g1	IsC2C2-9	0.06	0.18	0.07	1.08	1.66	1.15	0.47	0.69	0.27	0.69	0.95	1.48
TRINITY_DN13209_c0_g3	IsC2C2-10	10.15	9.26	10.91	21.4	21.37	19.43	12.4	10.87	14.79	11.25	10.28	10.43
TRINITY_DN13644_c0_g1	IsC2C2-11	22.89	19.42	21.91	1.59	1.69	1.07	0.68	0.65	0.74	5.81	5.59	5.25
TRINITY_DN13788_c0_g1	IsC2C2-12	3.33	1.3	2.25	1.81	2.42	2.26	1.29	1.56	1.15	2.67	1.71	1.05
TRINITY_DN14627_c0_g2	IsC2C2-13	4.42	4.99	4.34	3.52	2.93	3.54	5.36	4.71	5.23	19.57	18.8	19.74
TRINITY_DN15028_c0_g1	IsC2C2-14	41.62	42.39	41.2	0	0	0	0	0	0	0.4	0.54	0.76
TRINITY_DN16794_c0_g1	IsC2C2-15	4.19	4.1	5.29	4.33	3.72	3.3	6.08	5.66	6.35	5.38	5.89	5.52
TRINITY_DN19278_c0_g1	IsC2C2-16	176.33	156.34	170.33	65.51	56.84	53.41	42.49	43.95	44.39	77.69	78.78	77.21
TRINITY_DN19278_c0_g2	IsC2C2-17	2.57	2.41	2.35	0.05	0	0	0	0	0	0	0	0
TRINITY_DN19278_c0_g3	IsC2C2-18	3.09	2.56	2.35	22.39	17.3	17.89	5.68	5.6	4.89	19.42	19.61	19.98
TRINITY_DN19278_c1_g1	IsC2C2-19	0	0	0	0	0.68	0.23	0.54	0.66	1.39	0.19	0	0
TRINITY_DN19278_c1_g2	IsC2C2-20	0	0	0	0	0	0.89	2.88	1.99	2.44	0	0	0
TRINITY_DN20295_c0_g1	IsC2C2-21	0.63	0.57	0.66	11.42	8.6	8.37	2.12	2.33	3.33	1.18	0.97	1.57
TRINITY_DN2030_c0_g1	IsC2C2-22	3.33	2.65	3.51	3.68	2.88	3.28	4.34	3.77	5.27	2.48	3.15	2.59
TRINITY_DN2030_c0_g2	IsC2C2-23	10.54	12.48	11.99	13.86	12.25	10.92	9.1	11.37	11.53	5.64	6.12	7.34
TRINITY_DN20727_c0_g1	IsC2C2-24	2.62	2.56	2.39	1.5	0.98	0.61	0.56	0.7	0.28	4.12	4.26	3.52
TRINITY_DN2370_c0_g1	IsC2C2-25	0.04	0.04	0.04	7.87	8.48	6.76	1.85	1.53	1.74	6.66	6.68	6.79
TRINITY_DN2370_c0_g2	IsC2C2-26	12.19	10.05	12.09	45.93	40.11	38.56	38.53	38.88	36.63	37.65	38.62	37.85
TRINITY_DN25272_c0_g1	IsC2C2-27	0.27	0.36	0.51	0.45	0.34	0.42	0.82	0.32	0.41	0.42	0.64	0.09
TRINITY_DN26795_c0_g2	IsC2C2-28	1.67	0.99	1.33	0	0	0	0	0	0	0	0	0.18
TRINITY_DN27072_c0_g1	IsC2C2-29	18.76	21.58	20	3.32	2.88	2.1	0.42	0.46	0.57	0.56	0.27	0.65
TRINITY_DN2966_c0_g1	IsC2C2-30	38.92	37.7	39.33	41.73	42.21	34.98	33.17	33.19	35.63	50.17	48.05	49.65
TRINITY_DN3016_c0_g1	IsC2C2-31	21.04	18.65	20.11	27.08	22.21	22.48	28.96	27.42	29.99	30.88	31.2	33.86
TRINITY_DN32174_c0_g2	IsC2C2-32	64.76	62.81	66.91	5.95	6.38	5.51	14.07	12.07	14.51	31.88	43.27	29.26
TRINITY_DN33421_c0_g1	IsC2C2-33	10.14	9.94	11.11	12.71	10.18	10.32	13.85	16.1	13.44	6.68	6.01	7.57
TRINITY_DN36167_c0_g1	IsC2C2-34	0.79	2.31	0.9	0	0	0	0	0	0	0	0	0
TRINITY_DN37_c0_g1	IsC2C2-35	24.61	25.03	26.08	10.99	8.81	10.41	9.44	9.23	10.05	33.2	31.3	27.51
TRINITY_DN37_c0_g2	IsC2C2-36	7.93	7.65	8.64	34.92	29.19	28.05	19.87	18.98	17.74	25.69	25	22.66
TRINITY_DN3828_c0_g1	IsC2C2-37	47.37	42.49	48.41	4.15	4.36	3.51	11.13	10.04	10.75	7.85	6.49	7.47
TRINITY_DN39145_c0_g1	IsC2C2-38	0	0.2	0.46	0.41	0.19	0.38	0.22	0.36	0	0	0.36	0.22
TRINITY_DN40553_c0_g1	IsC2C2-39	0.51	3.76	1.73	0	0	0	0	0	0	0.2	0	0
TRINITY_DN4185_c0_g1	IsC2C2-40	2.28	3.24	1.49	10.87	9.53	10.28	4.6	5.25	5.9	15.74	20.72	20.6
TRINITY_DN468_c0_g1	IsC2C2-41	1.09	1.12	1.27	15.44	15.2	14.97	20.25	19.13	19.6	4.79	4.26	3.62
TRINITY_DN4965_c0_g1	IsC2C2-42	18.4	19.98	20.84	6.18	5.11	6.71	10.83	12.15	12.8	14.79	14.17	15.8
TRINITY_DN51807_c1_g1	IsC2C2-43	12.59	11.83	13.62	50.44	43.39	43.67	21.12	23.19	22.75	26.51	25.15	23.52
TRINITY_DN5346_c0_g1	IsC2C2-44	10.07	12.9	11.47	14.92	13.12	14.02	6.39	6.15	5.62	7.66	10.34	9.58
TRINITY_DN541_c0_g1	IsC2C2-45	93.68	84.81	93.45	29.22	24.75	24.75	38.87	41.19	38.07	64.44	58.39	61.36
TRINITY_DN54527_c0_g1	IsC2C2-46	2.88	1.6	2.05	0.55	0.84	1.18	0	0.32	1.02	0	0	0
TRINITY_DN5459_c0_g1	IsC2C2-47	11.7	11.03	11.03	2.99	2.17	2.38	6.11	7.34	6.4	4.91	4.65	6.65
TRINITY_DN5460_c0_g1	IsC2C2-48	31.96	30.16	28.33	78.27	74.52	71.65	13.43	13.71	14.01	39.53	39.7	38.07
TRINITY_DN57790_c0_g2	IsC2C2-49	173.19	154.29	170.5	151.43	135.94	132.72	118.94	113.57	118.44	145.73	154.05	156.17
TRINITY_DN6006_c0_g1	IsC2C2-50	6.05	5.31	6.09	13.94	14.06	12.85	25.5	30	26.79	10.66	8.89	11.57
TRINITY_DN6264_c0_g1	IsC2C2-51	21.98	20.32	23.54	20.9	16.67	17.61	19.73	19.87	16.31	20.33	20.35	20.92
TRINITY_DN6316_c0_g1	IsC2C2-52	6.81	5.9	6.63	25.44	21.64	19.2	4.24	4.12	4.97	31.66	34.15	28.62
TRINITY_DN6377_c0_g1	IsC2C2-53	150.78	130.87	147.22	55.7	51.29	50.51	21.92	22.47	23.82	66.26	67.18	67.82
TRINITY_DN63793_c0_g1	IsC2C2-54	0.35	0.35	0.24	5.31	5.12	3.9	0.63	0.38	1.16	0	0	0
TRINITY_DN63885_c0_g1	IsC2C2-55	5.46	4.82	6.47	0	0	0	0	0	0	0	0	0
TRINITY_DN64955_c0_g1	IsC2C2-56	3.51	0	0	0	0	0	0	0	0	0	0	0
TRINITY_DN6538_c0_g1	IsC2C2-57	162.01	157.4	169.89	11.52	9.88	9.16	42.06	43.28	41.96	26.55	25.07	25.61
TRINITY_DN6638_c0_g1	IsC2C2-58	1.83	1.73	2.66	12.93	12.38	12.28	4.98	5.78	5.4	6.93	7.38	6.15
TRINITY_DN6638_c0_g2	IsC2C2-59	1.06	1.12	1.49	0.79	0.67	0.57	1.71	1.49	1.52	4.57	4.89	5.03
TRINITY_DN6638_c1_g1	IsC2C2-60	1.89	2	1.76	4.09	3.49	3.92	2.58	2.61	2.2	3.02	2.63	2.83
TRINITY_DN6638_c2_g1	IsC2C2-61	3.85	3.71	3.7	9.21	9.57	9.69	5.47	6.43	5.98	9.9	10.82	9.24
TRINITY_DN69347_c0_g1	IsC2C2-62	1.32	2.04	1.34	0	0	0.07	0.07	0	0.2	0.29	0.33	0.38
TRINITY_DN71950_c0_g1	IsC2C2-63	2.73	1.07	0.62	0	0	0	0	0	0	0	0	0
TRINITY_DN7207_c0_g1	IsC2C2-64	77.45	70.57	77.96	34.27	31.92	33.16	26.27	26.53	25.13	27.18	29.37	29.11
TRINITY_DN72218_c0_g1	IsC2C2-65	30.72	25.34	26.81	0	0	0	0	0	0	0.47	0.16	0.31
TRINITY_DN72218_c0_g2	IsC2C2-66	16.32	16.4	18.34	0	0	0.05	0	0	0	0	0	0
TRINITY_DN75743_c0_g1	IsC2C2-67	1.25	0.82	1.89	0	0	0	0	0	0	0	0	0
TRINITY_DN77831_c0_g1	IsC2C2-68	3.95	3.9	3.92	1.74	1.66	1.99	2	2.05	2.05	10.76	11.6	10.05
TRINITY_DN77913_c0_g1	IsC2C2-69	0.19	0.25	0.14	1.63	1.69	1.09	0.56	1.28	0.96	1.26	0.83	1.16
TRINITY_DN7875_c0_g1	IsC2C2-70	3.34	3.9	3.75	3.97	2.39	2.68	0.87	1.2	1.26	2	2.91	2.72
TRINITY_DN80880_c0_g1	IsC2C2-71	0	0	0	0	0	0	0	0	1.17	0	0	0
TRINITY_DN86487_c0_g1	IsC2C2-72	3.39	4.19	3.43	1.07	0.82	1.48	4.06	4.28	4.36	0.91	0.6	0.75
TRINITY_DN87112_c0_g1	IsC2C2-73	1.42	1.27	1.37	0	0	0	0	0	0	0	0	0
TRINITY_DN9270_c0_g3	IsC2C2-74	21.17	19.99	20.19	11.56	10.91	9.61	9.82	9.36	12.89	16.47	16.52	16.23
TRINITY_DN9328_c0_g1	IsC2C2-75	2.58	4.09	2.77	1.22	1.66	1.5	0.98	0.72	0.37	2.58	1.87	1.78
TRINITY_DN946_c0_g1	IsC2C2-76	3.3	3.59	3.75	8.06	7.59	7.01	12.88	13.05	12.51	10.65	9.6	10.3
TRINITY_DN9662_c0_g1	IsC2C2-77	18.36	16.83	18.51	0	0	0	0	0	0	1.22	1.31	1.61
TRINITY_DN9978_c0_g1	IsC2C2-78	20.75	17.44	20.94	14.71	12.19	12.71	17.83	16.71	17.96	13.68	13.39	14.77
TRINITY_DN10828_c0_g1	IsC2H2-1	4.82	4.65	5.68	9.51	10.75	9.85	2.45	1.82	2.39	14.08	14.25	12.82
TRINITY_DN11394_c0_g1	IsC2H2-2	7.88	6.9	8.11	7.46	5.9	7.7	8.64	10.18	8.34	11.04	11.12	12.09
TRINITY_DN15077_c0_g1	IsC2H2-3	1.57	1.49	1.98	0	0	0	0	0	0	0	0.03	0
TRINITY_DN16656_c0_g1	IsC2H2-4	5.44	4.33	6.34	0.24	0.09	0.15	1.01	1.1	1.42	3.34	3.41	2.85
TRINITY_DN17082_c0_g1	IsC2H2-5	0	1.87	2.22	0	0	0	0	0	0	0	0	0
TRINITY_DN18128_c0_g1	IsC2H2-6	0	0	0	0	0	0	0	0	0	0.71	1.14	1.19
TRINITY_DN18128_c1_g2	IsC2H2-7	1.23	0	0	0	0	0	0	0	0	0	0	0
TRINITY_DN19166_c0_g1	IsC2H2-8	0	0	0	12.47	11.45	5.36	0	0	0	0	0	0
TRINITY_DN22572_c0_g1	IsC2H2-9	0	0	0	0.56	2.51	7.34	0	0	0	0	0	0
TRINITY_DN23441_c0_g1	IsC2H2-10	1.1	1.5	0.63	0	0	0	0	0	0	0	0	0
TRINITY_DN24849_c0_g2	IsC2H2-11	0	0	0	3.18	2.53	2.53	0	0	0	0	0	0
TRINITY_DN26276_c0_g1	IsC2H2-12	0.9	0.89	2.05	0	0	0	0	0	0	0	0	0
TRINITY_DN29478_c0_g1	IsC2H2-13	6.75	5.28	5.98	5.24	4.37	3.35	3	3.62	2.28	8.75	7.78	8.07
TRINITY_DN30721_c0_g1	IsC2H2-14	0	0	0	1.88	1.72	1.51	0	0	0	0	0	0
TRINITY_DN31239_c0_g1	IsC2H2-15	1.46	0.48	0.55	0	0	0	0	0	0	0.38	0	0.27
TRINITY_DN32762_c0_g2	IsC2H2-16	1.49	1.18	1.13	0	0	0	0	0	0	0	0	0
TRINITY_DN32877_c0_g1	IsC2H2-17	2.32	1.23	0.61	0	0	0	0	0	0	0	0	0
TRINITY_DN33388_c0_g2	IsC2H2-18	0	0	0	0	0	0	0	0	0	1.7	1.09	1.65
TRINITY_DN33991_c0_g1	IsC2H2-19	0	0	0	0	3.8	1.89	0	0	0	0	0	0
TRINITY_DN34376_c0_g1	IsC2H2-20	1.2	0.93	1.14	0	0	0	0	0	0	0	0	0
TRINITY_DN34456_c1_g1	IsC2H2-21	16.44	15.88	17.55	14.76	14.75	13.56	3.26	3.67	4.24	6.71	6.35	6.4
TRINITY_DN34945_c0_g2	IsC2H2-22	0	0	0	0.83	1.45	0	0	0	0	0	0	0
TRINITY_DN34945_c0_g3	IsC2H2-23	0	0	0	1.54	1.85	1.62	0	0	0	0	0	0
TRINITY_DN36226_c0_g3	IsC2H2-24	0	0	0	1.8	0.59	0.71	0	0	0	0	0	0
TRINITY_DN37767_c0_g2	IsC2H2-25	1.62	0.94	0.46	0	0	0	0	0	0	0	0	0
TRINITY_DN40833_c0_g4	IsC2H2-26	2.55	0.83	2.41	0	0	0	0	0	0	0	0	0
TRINITY_DN43085_c0_g2	IsC2H2-27	0	0	0	2.86	2.22	2.73	0	0	0	0	0	0
TRINITY_DN44336_c0_g2	IsC2H2-28	1.5	0.74	1.28	0	0	0	0	0	0	0	0	0
TRINITY_DN44532_c0_g1	IsC2H2-29	0.53	1.85	2.22	0	0	0	0	0	0	0	0	0
TRINITY_DN44573_c0_g2	IsC2H2-30	0.85	0.63	0.72	0	0	0	0	0	0	0	0	0
TRINITY_DN46990_c0_g5	IsC2H2-31	0.38	0.28	0	0	0	0	0	0	0	1.34	1.19	0.91
TRINITY_DN47745_c0_g2	IsC2H2-32	0	0	0	1.53	1.37	0.46	0	0	0	0	0	0
TRINITY_DN60849_c0_g5	IsC2H2-33	1.68	0.99	0.78	0	0	0	0	0	0	0	0	0
TRINITY_DN621_c0_g1	IsC2H2-34	15.79	15.21	16.58	34.39	30.64	29.93	63.12	62.38	64.1	46.81	46.25	47.41
TRINITY_DN62321_c0_g3	IsC2H2-35	0.71	1.04	1.6	0	0	0	0	0	0	0	0	0
TRINITY_DN6468_c0_g3	IsC2H2-36	3.46	1.87	2.15	7.32	5.78	7.6	1.95	2.89	3.64	8.14	8.04	8.39
TRINITY_DN67724_c0_g3	IsC2H2-37	3.21	2.8	3.58	0	0	0	0	0	0	0.1	0.07	0.05
TRINITY_DN67724_c0_g4	IsC2H2-38	1.61	0.95	1.09	0	0	0	0	0	0	0	0	0
TRINITY_DN72931_c0_g1	IsC2H2-39	0	0	0	1.44	2.55	0.65	0	0	0	0	0	0
TRINITY_DN751_c0_g1	IsC2H2-40	9.45	8.77	8.72	22.22	20.57	19.67	15.87	17.94	15.75	25.71	27.52	27.11
TRINITY_DN7521_c0_g1	IsC2H2-41	22.88	19.58	24.61	32.54	28.2	25.8	23.16	21	21.33	19.59	19.54	19.55
TRINITY_DN80810_c0_g1	IsC2H2-42	0.36	0.12	0.14	0	0.11	0	0.12	0	0.11	0.09	0.21	0.25
TRINITY_DN84166_c0_g1	IsC2H2-43	0	0	0	0	0	0.84	0	0	0	0	0	0
TRINITY_DN86092_c0_g1	IsC2H2-44	0.69	0	0.78	0	0	0	0	0	0	0	0	0
TRINITY_DN86153_c0_g1	IsC2H2-45	0	2.15	0	0	0	0	0	0	0	0	0	0
TRINITY_DN86853_c0_g1	IsC2H2-46	1.85	1.56	1.61	0	0	0	0	0	0	0	0	0
TRINITY_DN90971_c0_g1	IsC2H2-47	0	0	0	9.83	6.77	9.49	0	0	0	0	0	0
TRINITY_DN974_c0_g1	IsC2H2-48	24.3	22.14	24.47	58.94	49.89	47.7	55.83	57.63	59.71	33.46	32.8	34.61
TRINITY_DN1048_c0_g2	IsC3H1	68.87	61.48	64.96	29.78	25.51	25.92	35.07	35.82	37.05	47.61	48.88	44.98
TRINITY_DN11343_c0_g1	IsC3H2	23.64	22.84	23.06	27	24.57	23.16	34.55	34.58	34.45	33.45	33.47	32.64
TRINITY_DN12211_c0_g1	IsC3H3	26.05	24.18	26.58	24.59	20.47	20.38	22.67	25.94	24.75	20.08	18.88	21.9
TRINITY_DN1358_c0_g1	IsC3H4	13.4	12.98	15.46	15.72	15.18	14.31	18.22	20.26	19.27	23.21	24.14	22.33
TRINITY_DN13920_c0_g1	IsC3H5	29.28	24.83	28.2	30.42	28.32	27.34	23.1	25.09	25.26	27.11	25.92	25.28
TRINITY_DN1568_c0_g2	IsC3H6	16.23	14.02	15.51	31.51	28.78	30.63	29.33	26.78	29.14	7.11	6.96	7.7
TRINITY_DN1657_c0_g1	IsC3H7	23.99	20.66	21	32.8	28.31	27.79	34.25	34.59	32.36	31.06	32	26.86
TRINITY_DN1661_c0_g1	IsC3H8	143.48	135.19	144.43	213.66	189.02	182.76	175.92	181.5	177.96	168.53	170.24	165.78
TRINITY_DN1661_c0_g2	IsC3H9	33.07	28.12	30.22	48.66	44.11	43.25	55.22	59.08	57.61	63.48	66.31	63.75
TRINITY_DN2222_c0_g1	IsC3H10	22.02	20.41	22.94	22.32	18.31	18.23	28.02	26.87	25.89	28.85	25.59	26.88
TRINITY_DN2598_c0_g1	IsC3H11	54.91	51.41	55.3	153.7	129.15	130.45	128.74	127.46	128.84	148.98	143.72	141.42
TRINITY_DN29123_c0_g2	IsC3H12	0	0	2.96	0	0	0	0	0	0	0	0	0
TRINITY_DN29123_c1_g1	IsC3H13	2.21	0	0	0	0	0	0	0	0	0	0	0
TRINITY_DN29123_c2_g1	IsC3H14	0	0	0	1.23	1.11	1.41	0	0	0	0	0	0
TRINITY_DN3731_c0_g1	IsC3H15	30.42	26.1	29.13	28.13	23.91	26.42	44.33	43.46	42.68	51.64	51.86	53.22
TRINITY_DN37530_c0_g1	IsC3H16	1.33	0.65	0.38	0	0	0	0	0	0	0	0	0
TRINITY_DN48350_c0_g1	IsC3H17	12.72	9.84	9.98	19.1	16.8	16.13	20.38	20.77	20.65	21.89	21.1	19.91
TRINITY_DN48350_c0_g2	IsC3H18	14.38	10.31	11.31	21.15	13.47	14.04	21.92	22.03	23.29	14.72	14.39	16.65
TRINITY_DN6111_c0_g1	IsC3H19	17.8	15.24	17.55	14.41	11.42	12.15	12.5	13.38	14.42	8.31	7.66	7.34
TRINITY_DN64824_c0_g1	IsC3H20	2.1	1.37	0.79	0	0	0	0	0	0	0	0	0
TRINITY_DN70574_c0_g1	IsC3H21	0.51	0.8	0.17	0.44	0.27	0.14	0.44	0.33	0.27	0.06	0.07	0
TRINITY_DN83569_c0_g1	IsC3H22	0.22	0.11	0	1.78	1.23	1.12	0.9	0.39	0.71	1.03	1.08	0.82
TRINITY_DN8844_c0_g1	IsC3H23	3.51	2.52	3.07	10.37	9.87	9.01	5.21	5.27	5.92	1.75	2.44	2.04
TRINITY_DN90995_c0_g1	IsC3H24	0.71	3.48	0.81	0	0	0	0	0	0	0	0	0
TRINITY_DN93113_c0_g1	IsC3H25	2.15	1.79	1.89	12.8	12.03	12.69	6.33	5.31	5.46	2.03	2.49	1.97
TRINITY_DN11116_c1_g1	IsCAMTA1	28.45	26.4	29.98	21.23	17.3	16.72	19.61	17.99	20.1	28.11	29.27	27.99
TRINITY_DN164_c0_g3	IsCAMTA2	40.79	37.22	43.08	24.65	21.95	20.9	31.49	30.99	30.18	39.4	37.45	37.25
TRINITY_DN2181_c0_g1	IsCAMTA3	10.77	10.49	11.66	23.52	19.77	19.82	23.18	23	25.98	28.15	28.97	27.78
TRINITY_DN2181_c0_g4	IsCAMTA4	0.7	0.2	0.11	2.32	1.12	0.74	2.34	1.6	4.49	1.79	1.33	1.06
TRINITY_DN10525_c0_g1	IsCPP1	1.91	1.56	1.36	3.13	2.63	2.49	1.89	1.79	1.94	2.3	2.26	1.97
TRINITY_DN15889_c0_g1	IsCPP2	3.83	3.15	3.04	2.5	2.21	2.11	2.76	2.59	2.45	2.41	2.16	2.29
TRINITY_DN6005_c0_g1	IsCPP3	5.85	4.89	5.48	6.33	5.7	5.31	5.3	5.34	4.75	2.08	2.19	2.21
TRINITY_DN7205_c0_g1	IsCPP4	29.11	26.92	27.49	17.46	14.52	16.74	25.47	25.35	27.31	28.24	26.59	26.67
TRINITY_DN15158_c0_g1	IsE2F/DP1	1.99	1.75	1.47	9.56	10.78	12.03	1.53	1.6	1.16	1.05	1.87	1.93
TRINITY_DN17436_c0_g1	IsE2F/DP2	7.65	6.75	7.52	16.62	13.61	14.55	12.79	11.8	11.59	14.77	14.47	16.63
TRINITY_DN17436_c0_g2	IsE2F/DP3	7.49	6.53	8.34	3.1	2.98	3.84	5.95	6.66	6.23	9.97	9.4	10.25
TRINITY_DN647_c0_g1	IsE2F/DP4	44.12	39.6	44.86	21.59	16.69	17.73	26.55	28.82	28.94	27.22	26.99	26.75
TRINITY_DN3169_c0_g1	IsEIL1	108.9	102.45	111.68	97.79	85.67	85.55	77.91	77.11	76.83	133.86	133.58	131.5
TRINITY_DN43389_c0_g1	IsEIL2	289.43	259.32	285.09	253.74	218.81	220.2	192.86	197.62	202.48	403.26	401.46	387.99
TRINITY_DN67080_c0_g1	IsEIL3	30.4	27.98	32.09	26.98	23.38	22.54	56.04	53.93	54.3	53.66	52.25	51.01
TRINITY_DN93009_c0_g1	IsEIL4	0.66	0.83	0.71	0.71	0.39	0.58	0.25	0.41	0.26	0.06	0	0
TRINITY_DN11427_c0_g1	IsFAR1-1	16.74	15.63	18.56	19.32	18.42	17.27	9.36	9.66	8.93	19.36	18.26	20.34
TRINITY_DN15807_c0_g1	IsFAR1-2	8.82	7.89	8.51	1.37	2.21	2.93	2.09	1.96	1.69	1.17	0.76	0.77
TRINITY_DN16553_c0_g1	IsFAR1-3	2.67	0.83	2.72	3.1	1.16	2.34	3.43	1.19	3.11	2.87	1.65	8.35
TRINITY_DN1691_c0_g3	IsFAR1-4	11.07	9.39	10.93	11.44	9	10.2	12.5	11.88	11.59	15.62	15.67	15.41
TRINITY_DN21568_c0_g1	IsFAR1-5	1.03	0.59	0.49	1.04	0.72	0.79	0	0	0	0	0	0
TRINITY_DN21568_c0_g5	IsFAR1-6	0	0	0	0	0	0.83	0	0	0	2.04	0	2.26
TRINITY_DN22144_c0_g2	IsFAR1-7	0.68	2.23	0.51	0	0	0	0	0	0	0.53	0	0
TRINITY_DN23844_c0_g1	IsFAR1-8	7.01	6.47	7.44	12.16	10.96	10.98	10.95	10.48	10.6	14.04	14.43	13.69
TRINITY_DN26887_c0_g2	IsFAR1-9	7.37	6.92	8.02	18.32	14.54	14.42	16.6	16.94	17.56	18.41	18.91	18.12
TRINITY_DN27275_c0_g1	IsFAR1-10	0	0	0	0	1.03	0	0	0	0	0	0	1.73
TRINITY_DN32688_c0_g4	IsFAR1-11	0.14	0	0	0.31	0.26	0.17	1.17	1	0.29	0	0.51	0
TRINITY_DN35878_c0_g1	IsFAR1-12	1.6	1.51	1.84	2.12	1.65	2.03	3.13	1.95	2.23	2.43	2.03	1.5
TRINITY_DN38291_c0_g2	IsFAR1-13	0.97	0.91	0.99	9.85	7.84	7.08	4.02	4.28	5.81	4.04	5.84	5.51
TRINITY_DN39100_c0_g1	IsFAR1-14	0.69	0.26	0.49	0	0	0	0.44	1.16	0.56	0.07	0.08	0.55
TRINITY_DN42121_c0_g1	IsFAR1-15	0	1.42	3.36	0	0	0	0	0	0	0	0	0
TRINITY_DN4710_c0_g1	IsFAR1-16	10.23	6.64	9.31	10.3	9.57	10.48	11.28	10.44	11.31	10.97	11.18	11.82
TRINITY_DN53391_c0_g1	IsFAR1-17	2.14	1.95	3.21	0.8	0.52	0.34	1.89	2.19	1.79	1.53	2.07	0.83
TRINITY_DN57223_c0_g3	IsFAR1-18	0.18	1.25	2.25	0	0	0	0	0	0	0	0	0.2
TRINITY_DN6398_c0_g1	IsFAR1-19	31.98	28.72	31.6	11.92	10.19	8.82	8.69	9.05	9.75	13.23	13.92	13.97
TRINITY_DN6511_c1_g1	IsFAR1-20	28.99	26.36	27.87	19.23	19.1	17.93	14.69	13.27	13.07	21.25	21.27	19.37
TRINITY_DN7088_c1_g1	IsFAR1-21	0.36	0	0	1.13	0	2.06	0	0	0.71	0	0.66	0.42
TRINITY_DN7088_c1_g2	IsFAR1-22	3.96	4.95	3.83	5.56	4.8	4.32	5.34	5.31	5.99	5.23	5.07	5.72
TRINITY_DN7122_c0_g1	IsFAR1-23	1.86	1.95	2.02	3.22	3.25	3.25	3.4	2.81	3.76	3.74	4.54	3.43
TRINITY_DN73777_c0_g1	IsFAR1-24	1.13	1.28	1.47	0	0	0	0	0.15	0	0.13	0	0.35
TRINITY_DN7840_c0_g1	IsFAR1-25	10.19	10.96	12.96	13.15	14.45	11.44	8.79	7.76	9.38	16.36	15.54	16.47
TRINITY_DN16559_c0_g1	IsGeBP1	26.46	22.32	28.06	44.19	36.8	37.26	44.28	45.07	47.89	50.4	52.76	52.72
TRINITY_DN20547_c0_g1	IsGeBP2	1.16	0.6	1.13	2.47	2.13	2.87	2.63	3.07	3.01	3.76	3.63	3.91
TRINITY_DN2341_c0_g1	IsGeBP3	63.56	60.46	65.27	118.93	108.24	106.92	146.3	149.15	142.94	149.63	145.72	150.6
TRINITY_DN2341_c0_g2	IsGeBP4	13.75	12.13	13.8	73.21	65.13	62.52	58.66	60.35	57.56	54.91	56.02	56.94
TRINITY_DN3855_c0_g1	IsGeBP5	99.63	95.14	94.91	27.25	25.33	23.4	33.98	31.86	29.46	34.38	29.17	35.13
TRINITY_DN10997_c0_g1	IsGRAS1	5.08	4.01	5.36	2.45	2.41	2.67	1.45	1.32	0.69	3.39	4.23	2.99
TRINITY_DN11202_c1_g1	IsGRAS2	39.9	37.88	40.49	37.23	32.75	33.29	39.54	39.48	38.78	27.66	26.7	28.67
TRINITY_DN11238_c0_g1	IsGRAS3	5.53	5.21	6.09	11.57	10.4	10.12	4.66	4.47	4.46	23.37	23.5	23.68
TRINITY_DN11269_c0_g1	IsGRAS4	5.73	5.24	6.51	1.66	1.04	1.28	0.76	0.72	0.49	5.16	5.6	5.72
TRINITY_DN11822_c0_g1	IsGRAS5	17.44	15.96	17.96	23.91	20.84	21.09	71.65	76.12	72.49	11.97	12.09	12.63
TRINITY_DN13079_c0_g1	IsGRAS6	12.81	11.69	13.41	9.96	9.41	8.51	4.3	4.13	3.74	10.97	11.37	10.21
TRINITY_DN13271_c0_g1	IsGRAS7	4.61	5.43	4.95	0	0	0	0	0.11	0.04	0	0	0
TRINITY_DN13918_c0_g1	IsGRAS8	66.15	60.08	66.31	60.36	53.26	52.97	63.33	65.73	68.75	54.4	52.59	50.4
TRINITY_DN14253_c0_g1	IsGRAS9	0.59	0.78	1.34	0.4	0	1.29	0.43	0.35	0	0	0.35	0.43
TRINITY_DN14253_c0_g2	IsGRAS10	0.9	0.69	0.71	1.26	0.72	0.77	0	0.31	0.06	0.05	0.06	0.07
TRINITY_DN14253_c0_g3	IsGRAS11	0	0	0	1.01	0.44	0.54	0	0.31	0.11	0.32	0.1	0.12
TRINITY_DN14348_c0_g2	IsGRAS12	1.59	0.63	1.29	0.8	0.3	1.04	1.02	1.15	0.44	1.61	1.42	1.54
TRINITY_DN1457_c1_g3	IsGRAS13	7.58	8.28	9.2	34.65	29.49	28.35	26.12	29.15	29.95	31.68	30.02	29.05
TRINITY_DN15522_c0_g3	IsGRAS14	13.59	11.66	13.19	9.47	7.42	7.99	15.36	16.19	15.54	8.64	9.6	10.06
TRINITY_DN16587_c0_g2	IsGRAS15	39.62	36	39.08	15.01	15.22	14.05	33.66	32.74	31.56	19.41	19.61	23.09
TRINITY_DN1706_c0_g1	IsGRAS16	4.94	3.58	5.45	6.36	5.98	5.68	3.22	2.99	2.55	6.93	7.87	7.63
TRINITY_DN18420_c0_g1	IsGRAS17	9.63	14.42	12.98	9.91	8.65	7.6	16.67	18.12	12.1	12.19	9.42	12.75
TRINITY_DN18672_c0_g1	IsGRAS18	0	0	0	1.82	1.1	1.65	1.46	1.69	3.16	0.09	0	0.25
TRINITY_DN18672_c0_g2	IsGRAS19	0	0.63	0.74	4.61	1.86	5.38	0.83	0	2.06	0	0.61	0.83
TRINITY_DN18743_c0_g1	IsGRAS20	0.57	0.44	0.58	0.73	0.8	0.7	0	0	0	3.32	2.56	3.39
TRINITY_DN20117_c0_g1	IsGRAS21	42.41	39.14	41.96	17.22	15.81	15.81	38.31	39.08	38.4	25.62	26.69	27.95
TRINITY_DN20170_c0_g4	IsGRAS22	3.88	4.07	4.27	3.44	3.2	3.2	4.7	4.41	5.03	4	4.23	4.09
TRINITY_DN20174_c1_g3	IsGRAS23	15.38	12.6	15.1	22.87	19.3	20.1	20.34	21.05	21.1	18.8	20.94	18.64
TRINITY_DN20397_c0_g5	IsGRAS24	7.52	7.52	8.71	7.17	5.73	5.79	6.39	6.83	6.59	7.91	7.19	7.68
TRINITY_DN20943_c0_g1	IsGRAS25	0.74	1.36	1.71	1.84	1.6	1.62	0.42	0.64	0.54	5.44	2.21	2.02
TRINITY_DN2333_c1_g1	IsGRAS26	294.61	273.31	302.88	133.92	117.85	117.95	199.28	199.5	197.59	52.86	49.74	51.27
TRINITY_DN2354_c0_g1	IsGRAS27	8.3	7.65	9.35	10.52	8.13	9.17	8.21	6.96	8.17	17.55	18.82	17.4
TRINITY_DN29112_c0_g1	IsGRAS28	0.99	0.59	1.01	0.2	0.74	0.27	0.1	0	0.27	0.23	0.18	0
TRINITY_DN29112_c0_g3	IsGRAS29	0.88	0.58	0	0.3	0.27	0	0	0	0	0	0.79	0.33
TRINITY_DN29563_c0_g1	IsGRAS30	12.56	11.48	12.61	7.91	7.35	6.24	19.96	19.32	19.43	11.45	12.86	12.75
TRINITY_DN29583_c0_g1	IsGRAS31	30.27	28.08	31.32	10.77	9.43	9.07	8.44	7.93	8.55	13.24	12.73	12.95
TRINITY_DN30498_c0_g1	IsGRAS32	0	0	2.41	0.76	0	0	1.84	0	0.76	0.56	0	0.91
TRINITY_DN319_c0_g1	IsGRAS33	35.53	32.12	36.31	8.42	8.28	8.19	6.47	6.72	5.87	7.06	7.26	6.74
TRINITY_DN36514_c0_g1	IsGRAS34	0	1.67	0	0	1.64	0	0	0	0	0	0	0
TRINITY_DN43008_c0_g1	IsGRAS35	3.13	2.99	3.23	0	0.2	0.04	0.25	0.23	0.08	0.13	0.19	0.04
TRINITY_DN5147_c0_g1	IsGRAS36	37.15	39.04	43.14	28.29	27.7	26.59	48.81	50.35	47.06	31.45	27.33	31.34
TRINITY_DN5176_c0_g1	IsGRAS37	19.68	17.16	18.49	18.15	15.61	17	25.87	25.86	26.46	23.68	24.23	22.92
TRINITY_DN5176_c0_g2	IsGRAS38	7.78	7.44	7.11	12.03	9.68	10.02	13.13	12.68	14.28	19.85	18.87	18.46
TRINITY_DN53132_c0_g1	IsGRAS39	0	0	2.15	2.23	0	1.89	0	0	0	0	0	0
TRINITY_DN53132_c0_g3	IsGRAS40	0	0	0	0	0	3.54	0	0	0	2.99	0	0
TRINITY_DN53132_c0_g4	IsGRAS41	0.31	0.3	1.04	0.47	0.29	0.14	0	0	0.57	0.59	0.14	0.17
TRINITY_DN54333_c0_g1	IsGRAS42	0	0	0	0	0	2.09	3.08	0	0	0	0	0
TRINITY_DN54333_c0_g2	IsGRAS43	0.87	0	1.34	2.84	5.81	2.95	1.16	0.83	1.44	0.7	5.06	4.63
TRINITY_DN54490_c0_g1	IsGRAS44	1.16	0.43	0.23	0.47	0.59	0.58	0.68	0.74	1.11	1.43	1.48	0.89
TRINITY_DN5454_c0_g1	IsGRAS45	25.54	21.88	24.71	7.36	6.95	6.3	1.95	1.83	1.51	33.77	33.57	33.76
TRINITY_DN55383_c0_g1	IsGRAS46	0	0	2.45	0	0	0	0	0	5.6	0	0	0
TRINITY_DN55383_c0_g2	IsGRAS47	0	3.66	0	0	0	0	0	0	0	0	0	0
TRINITY_DN57081_c0_g1	IsGRAS48	1.48	2.18	0.84	0	0	0	0	0	0	0	0	0
TRINITY_DN57081_c0_g2	IsGRAS49	1.48	1.68	1.46	0	0	0.06	0	0.18	0	0	0.06	0.07
TRINITY_DN6778_c0_g1	IsGRAS50	7.95	6.98	8.79	26.48	23.68	24.36	15.51	16.03	17.17	29.18	30.85	28.11
TRINITY_DN73572_c0_g2	IsGRAS51	1.85	1.53	2.52	0.68	0.63	0.77	1.2	0.88	1.11	0.95	0.82	0.72
TRINITY_DN7964_c0_g2	IsGRAS52	10.53	8.87	10.72	34.54	28.27	29.19	24.72	26.54	25.81	27.82	25.59	24.33
TRINITY_DN804_c0_g1	IsGRAS53	11.76	9.76	11.49	12.72	10.04	11.2	9.92	10.51	11.2	11.45	12.18	10.91
TRINITY_DN804_c0_g2	IsGRAS54	9.72	8.8	9.12	10.29	9.14	9.15	8.14	10.63	9.21	6.49	6.44	5.4
TRINITY_DN9713_c0_g1	IsGRAS55	15.89	14.07	16.09	10.68	9.93	9.52	11.9	13.1	12.57	11.61	11.14	11.31
TRINITY_DN10599_c0_g1	IsGRF1	0.42	0.51	0.26	0.58	0.51	0.21	0.83	1.18	0.65	0.68	0.89	0.69
TRINITY_DN15115_c0_g1	IsGRF2	5.7	5.33	5.99	6.27	5.59	5.36	4.74	4.87	5.05	7.49	7.1	7.35
TRINITY_DN4182_c0_g1	IsGRF3	29.88	30.68	31.42	23.35	18.18	18.97	29.99	29.8	28.83	41.52	39.96	42.87
TRINITY_DN7096_c0_g1	IsGRF4	1.91	1.61	1.89	5.35	4.76	4.12	4.97	4.56	4.31	1.68	1.55	1.7
TRINITY_DN7167_c0_g1	IsGRF5	13.67	15.29	13.33	10.93	8.68	7.97	5.4	7.13	6.49	10.5	10.12	10.91
TRINITY_DN94955_c0_g1	IsGRF6	0.71	0.69	0.4	0	0.33	1	0	0.32	0	0	0.32	0
TRINITY_DN9749_c1_g1	IsGRF7	0.3	0.3	0.35	0	0	0	0	1.22	0.42	0	0	0.33
TRINITY_DN9823_c0_g1	IsGRF8	5.72	4.51	5.34	1.91	1.69	1.13	1.36	1.49	1.28	0.16	0.35	0.34
TRINITY_DN10254_c0_g1	IsHSF1	20.66	20.79	20.93	15.03	12.47	13.22	20.93	23.14	21.33	19.43	20.44	19.89
TRINITY_DN15420_c0_g1	IsHSF2	58.33	51.53	59.35	41.95	37.78	35.97	56.11	61.46	57.63	61.35	60.67	60.59
TRINITY_DN16584_c0_g1	IsHSF3	0.85	0.3	0.34	1.22	0.9	1.62	0.6	0.43	0.55	1.74	1.23	1.07
TRINITY_DN1745_c1_g1	IsHSF4	63.01	53.55	62.12	131.67	121.1	114.33	162.62	159.66	168.64	169.41	165.54	171.63
TRINITY_DN1745_c1_g2	IsHSF5	159.99	151.57	164.14	30.1	25.95	26.84	27.07	26.25	25.13	17.04	16.23	16.71
TRINITY_DN2683_c0_g2	IsHSF6	10.64	10.02	12.55	13.59	11	11.29	14.12	15.22	14.62	17.6	18.42	18.07
TRINITY_DN4400_c0_g1	IsHSF7	4.25	5.46	4.39	1.02	1	1.22	1.12	0.92	1.02	4.26	3.48	4.79
TRINITY_DN5412_c0_g1	IsHSF8	94.65	86.51	93.69	12.39	10.53	10.41	16.62	17.54	15.89	25.4	25.6	24.86
TRINITY_DN5412_c0_g2	IsHSF9	115.49	103.78	114.75	40.67	36.92	37.44	26.64	26.16	26.27	52.19	49.92	51.51
TRINITY_DN54723_c0_g1	IsHSF10	11.55	11.17	13.47	38.91	37.35	31.06	54.36	57.33	49.06	35.98	30.25	33.64
TRINITY_DN6209_c0_g1	IsHSF11	8.25	8.24	8.22	6.73	6.26	6.44	8.67	7.92	9.3	11.36	10.85	10.92
TRINITY_DN63_c1_g2	IsHSF12	7.08	6.68	8.09	7.72	7.83	7.93	6.56	7.19	6.75	5.59	5.79	5.48
TRINITY_DN7657_c0_g1	IsHSF13	4	3.61	4.89	13.34	12.19	12.15	7.68	6.98	5.79	1.9	2.13	2.06
TRINITY_DN8086_c1_g1	IsHSF14	24.85	21.39	22.47	4.43	3.6	4.17	7.67	7.14	8.25	9.74	9.59	10.98
TRINITY_DN86819_c0_g1	IsHSF15	0	0	0	6.46	5.29	6.02	0.52	0.6	0.3	1.23	1.32	0.94
TRINITY_DN86898_c0_g1	IsHSF16	0	0	0	1.3	1.01	1.27	0	0	0	0	0	0
TRINITY_DN949_c0_g1	IsHSF17	23.84	20.53	24.3	32.72	31.12	29.03	35.23	35.81	35.4	32.34	30.35	32.14
TRINITY_DN10128_c0_g1	IsLBD1	4.82	4.64	5.27	3.99	2.32	3.1	1.6	1.97	1.62	2.26	1.93	1.97
TRINITY_DN10769_c0_g3	IsLBD2	0.62	0.27	0.79	1.78	1.24	1.96	0	0	0.23	3.79	3.05	3.06
TRINITY_DN13151_c0_g1	IsLBD3	14.9	14.84	15.75	15.69	14.33	13.14	14.03	13.61	15.25	16.39	15.27	17.89
TRINITY_DN13311_c0_g1	IsLBD4	57.56	50.44	53.23	40.8	31.71	33.73	24.91	28.01	28.83	45.19	46.65	49.95
TRINITY_DN13384_c0_g1	IsLBD5	21.95	23.3	24.09	30.01	30.5	26.66	18.28	16.84	19.8	29.34	29.42	29.64
TRINITY_DN1359_c1_g1	IsLBD6	14.27	11.92	13.82	15.25	12.7	13.31	14.91	15.87	16.42	25.95	25.92	25.79
TRINITY_DN14151_c1_g2	IsLBD7	3.21	2.48	1.65	1.89	1.8	1.53	1.95	1.98	1.93	1.29	2.89	3.3
TRINITY_DN14151_c1_g3	IsLBD8	0.23	0	0.07	1.98	1.35	1.23	0	0	0	0.04	0.05	0.06
TRINITY_DN14353_c0_g1	IsLBD9	2.45	1.46	2.42	0.17	0	0	0	0.15	0.46	0.25	0	0
TRINITY_DN1779_c0_g1	IsLBD10	37.67	33.32	35.19	162.6	144.36	142.4	99.46	99.49	96.65	192.3	194.01	190.68
TRINITY_DN18571_c0_g4	IsLBD11	17.8	13.67	16.7	27.52	25.5	24.55	17.46	20.15	18.39	25.24	23.87	26.19
TRINITY_DN19654_c0_g2	IsLBD12	0.12	0.12	0.07	21.51	16.06	16.63	19.79	19.65	22.46	12.42	10.4	10.59
TRINITY_DN240_c0_g2	IsLBD13	6.45	5.79	4.99	8.19	7.2	6.49	9.92	9.54	7.73	15.24	15.09	13.41
TRINITY_DN240_c0_g3	IsLBD14	1.19	0	0	0	0	0	0	1.18	0	0	1.21	0
TRINITY_DN24414_c0_g1	IsLBD15	2.81	1.49	2.78	0.28	0.09	0.26	0.1	0	0	0.36	0.08	0.49
TRINITY_DN27034_c0_g2	IsLBD16	0.39	0	0	0.4	0	0.18	0.43	0	0.37	1.67	1.57	0.65
TRINITY_DN39142_c0_g1	IsLBD17	22.11	19.7	22.06	15.96	15.11	14.01	20.3	21.16	20.45	17.79	17.3	17.63
TRINITY_DN3996_c0_g1	IsLBD18	0.85	0.61	0.71	1.51	1.81	0.92	1.13	1.23	1.66	16.52	15.62	14.67
TRINITY_DN42699_c0_g1	IsLBD19	1.37	2.68	0	0	0	0	0	0	0	0	0	0
TRINITY_DN52863_c0_g1	IsLBD20	22.35	20.83	21.09	40.83	35.63	34.84	25.57	25.19	25.49	111.88	102.2	104.51
TRINITY_DN5292_c0_g2	IsLBD21	27.21	23.94	24.45	16.91	13.61	13.37	2.6	3.24	2.35	6.52	7.34	6
TRINITY_DN53385_c0_g1	IsLBD22	1.74	0.99	0.96	0.32	0.1	0.19	0.05	0.05	0	0.29	0.09	0.44
TRINITY_DN55137_c0_g2	IsLBD23	0	0	0	1.19	0.62	0.94	0	0	0	0	0	0
TRINITY_DN58158_c0_g1	IsLBD24	0	1.73	0	0	0	0	0	0	0	0	0	0
TRINITY_DN6206_c0_g1	IsLBD25	205.41	184.13	209.51	33.98	31.48	31.49	40.61	38.07	35.79	30.82	29.65	30.39
TRINITY_DN67400_c0_g2	IsLBD26	0	0	0	0.23	0.21	0	0.25	0	0.43	1.76	1.42	0
TRINITY_DN69428_c0_g2	IsLBD27	0	0	0	0	0	0	0	1.74	1.01	0	1.77	0
TRINITY_DN6987_c0_g1	IsLBD28	4.81	4.44	4.55	24.23	20.41	22.55	1.27	1.26	1.23	11.9	12.2	12.21
TRINITY_DN7103_c0_g1	IsLBD29	7.81	7.14	8.13	17.39	15.44	15.04	10.9	12.1	12.75	13.7	14.25	14.42
TRINITY_DN7185_c0_g1	IsLBD30	141.85	131.43	145.17	136.19	120.69	118.63	50.1	48.95	51.47	152.95	152.01	145.44
TRINITY_DN743_c0_g1	IsLBD31	91.29	86.52	91.76	102.55	95.12	86.7	79.88	77.78	79.9	131.1	132.86	133.49
TRINITY_DN93207_c0_g1	IsLBD32	0.46	0.68	0.78	0	0	0	0	0	0	0	0	0
TRINITY_DN93879_c0_g1	IsLBD33	1.51	2.15	0.86	0.86	0.62	1.23	0.38	0.84	0.61	1.39	1.09	0.7
TRINITY_DN9667_c0_g2	IsLBD34	0.36	0.86	0.82	14.03	13.66	13.38	2.38	1.79	2.36	12.38	13.29	13.87
TRINITY_DN10605_c0_g2	IsLOB1	1.62	1.61	1.44	3.36	2.69	3.17	3.55	4.18	4.05	4.55	5.27	5.3
TRINITY_DN10954_c1_g1	IsLOB2	5.41	4.28	4.06	4.78	5.66	3.99	3.17	4.36	3.62	6.77	6.56	6.29
TRINITY_DN10954_c1_g2	IsLOB3	20.37	16.03	19.63	1.07	0.9	1.25	0.29	0.17	0.09	1.12	1.11	0.91
TRINITY_DN1155_c0_g1	IsLOB4	31.61	26.99	30.01	36.73	33.59	33.3	12.16	11.57	11.27	15.85	15.29	14.79
TRINITY_DN11694_c0_g1	IsLOB5	2.34	0.37	2.45	4.66	5.64	5.03	0.57	0.29	0.51	1.24	2.92	0.67
TRINITY_DN12357_c0_g2	IsLOB6	0.79	0	0	18.91	16.01	18.6	3.4	2.47	2.88	0.25	0.32	0
TRINITY_DN12679_c0_g1	IsLOB7	1.4	1.39	1.07	5.59	4.24	6	3.87	4.11	5	0	0.06	0.07
TRINITY_DN16179_c0_g1	IsLOB8	1	1.43	1.3	0.64	0.52	1.1	0.23	0.21	0.46	0.06	0.07	0.32
TRINITY_DN17549_c0_g2	IsLOB9	0.08	0.15	0	1	0.78	0.99	0.61	0.14	0.49	3.03	1.56	3.51
TRINITY_DN2023_c0_g1	IsLOB10	38.95	35.34	39.27	152.81	134.12	131.37	35.5	36.43	36.53	48.15	49.2	46.6
TRINITY_DN26111_c0_g2	IsLOB11	0.85	0.84	1.05	0.08	0	0.14	0.77	0.41	0.85	0	0	0
TRINITY_DN41736_c0_g1	IsLOB12	24.25	20.69	21.9	3.74	3.24	3.08	0.32	0.17	0.14	0	0.07	0
TRINITY_DN4370_c0_g1	IsLOB13	3.12	3.04	2.35	44.33	40.08	36.92	39.68	44.51	39.42	19.44	22.08	19.86
TRINITY_DN44535_c0_g1	IsLOB14	0.29	0.29	0.16	1.76	1.89	0	0.3	0.26	0.81	0.11	0	0
TRINITY_DN45993_c0_g1	IsLOB15	0	0.08	0	4.99	3.67	4.86	0.65	0.73	0.94	0	0	0
TRINITY_DN6046_c0_g1	IsLOB16	1.89	1.88	1.44	8.76	5.96	4.43	0.66	0.67	0.31	1.99	2.06	0.91
TRINITY_DN64589_c0_g1	IsLOB17	2.12	0.66	0.61	0.54	0.5	0.25	1.11	0.83	0.37	0	0.35	0
TRINITY_DN7277_c0_g1	IsLOB18	3.38	3.48	3.71	18.86	15.64	16.01	70.22	69.88	72.27	64.79	65.42	66.56
TRINITY_DN7277_c0_g2	IsLOB19	3.13	2.53	2.12	4.65	5.16	5.21	11.04	10.7	11.06	10.96	11.54	10.23
TRINITY_DN8665_c0_g1	IsLOB20	6.47	4.81	7.43	29.8	27.89	28.25	4.15	3.52	4.75	24.08	22.62	20.36
TRINITY_DN94166_c0_g1	IsLOB21	0.21	0	0.12	0	0	0	5.58	4.41	4.55	0.33	0.65	0.56
TRINITY_DN10768_c0_g1	IsMADS1	1.4	1.65	1.81	0.8	0.91	0.8	0.95	0.83	1.04	0.73	0.64	0.92
TRINITY_DN11124_c0_g1	IsMADS2	5.16	4.88	5.35	5.86	3.13	5.59	2.6	1.87	3.18	1.83	2.47	1.53
TRINITY_DN11958_c0_g1	IsMADS3	0.36	0.5	0.58	3.79	3.91	3.61	5.79	4.84	6.67	16.92	17.38	17.04
TRINITY_DN12392_c0_g1	IsMADS4	0.87	2.44	3.99	0.77	1.11	0.68	1.68	0.33	0.11	0.72	0.16	0.2
TRINITY_DN15388_c0_g1	IsMADS5	7.45	6.41	7.11	0	0	0	0	0	0	0	0.1	0
TRINITY_DN16849_c0_g1	IsMADS6	0.29	0.07	0.84	0.07	0	0	0.44	0.59	0.47	7.96	8.62	5.38
TRINITY_DN17709_c0_g1	IsMADS7	4.45	4.69	7.03	4.34	2.68	3.46	0	0	0	1.01	0	0
TRINITY_DN2003_c0_g1	IsMADS8	6.02	5.81	6.15	11.59	7.13	8.21	9.04	8.52	9.32	13.07	15.79	11.79
TRINITY_DN2003_c0_g2	IsMADS9	26.4	28.26	25.24	27	21.02	20.39	17.97	20.07	19.34	17.91	17.46	17.31
TRINITY_DN22404_c0_g1	IsMADS10	0.23	0.11	0.13	0.58	2.14	0.85	0.59	0.92	0.95	0	0	0.12
TRINITY_DN231_c0_g1	IsMADS11	78.91	68.94	71.94	41.6	37.74	37.64	33.65	32.51	32.24	0.6	0.96	0.39
TRINITY_DN25538_c0_g1	IsMADS12	0	0	0.11	3.12	2.71	3.38	0	0	0.43	0.15	0	0.2
TRINITY_DN25538_c1_g1	IsMADS13	1.62	2.05	2.52	0	0	0	0.07	0	0	0	0	0
TRINITY_DN26900_c0_g1	IsMADS14	0	0	0.13	2.88	2.87	3.18	0.12	0.1	0	6.11	6.08	6.18
TRINITY_DN27213_c0_g1	IsMADS15	0	2.62	1.54	0	0	0	0	0	0	0	0	0
TRINITY_DN2915_c0_g1	IsMADS16	81.95	73.86	85.44	36.09	26.8	32.34	44.19	43.77	46.02	66.46	73.7	73.7
TRINITY_DN33546_c0_g1	IsMADS17	42.05	38.22	39.21	25.59	24.31	23.68	9.4	10.39	10.14	28.18	27.67	27.89
TRINITY_DN4015_c2_g1	IsMADS18	2.94	3.43	3.07	24.39	20.22	20.62	47.51	48.54	51.61	1.59	1.19	0.93
TRINITY_DN49207_c0_g1	IsMADS19	0	0	0	0.93	4.06	2.48	0	0	0	0	0.82	0
TRINITY_DN63568_c0_g1	IsMADS20	0.23	0.23	0.07	21.97	20.78	19.92	5.16	6.32	7.26	0.98	0.41	0.24
TRINITY_DN7165_c0_g1	IsMADS21	19.49	15.54	7.74	0	0	0	0	0.06	0.12	0.05	1.6	0
TRINITY_DN7603_c0_g1	IsMADS22	1.34	2.03	1.05	6.01	4.72	5.67	2.83	2.93	1.67	1.35	1.77	0.74
TRINITY_DN78184_c0_g1	IsMADS23	0.93	0.21	0.71	0.52	1.06	0.77	0.53	0.83	0.19	0	0.09	0
TRINITY_DN84400_c0_g1	IsMADS24	3.5	3.77	4.88	3.15	3.91	4.34	6.34	6.44	6.81	5.68	6.4	6.88
TRINITY_DN84722_c0_g1	IsMADS25	1.12	0.28	0.64	0	0	0.26	0	0	0	0	0	0
TRINITY_DN849_c1_g1	IsMADS26	220.44	216.79	214.02	98.31	85.47	77.31	2.95	4.07	6.4	30.97	29.18	37.72
TRINITY_DN85784_c0_g1	IsMADS27	0.79	1.56	0.45	0	0	0	0	0	0	0	0	0
TRINITY_DN86534_c0_g1	IsMADS28	8.19	6.81	9.53	2.11	1.81	2.28	16.69	13.32	13.92	2.26	2.38	1.64
TRINITY_DN91446_c0_g1	IsMADS29	0.36	0.36	1.24	0.49	0	0	0	0	0	0	0.21	0
TRINITY_DN9405_c0_g1	IsMADS30	1.51	1.05	1	1.26	1.67	2.05	0.4	0.31	0.5	0.9	1.24	0.7
TRINITY_DN1003_c0_g1	IsMYB1	6.56	5.84	8.33	14.23	12.07	13	8.71	8.99	9	14.27	14.81	13.54
TRINITY_DN1003_c0_g2	IsMYB2	12.14	11.42	11.96	7.78	6.63	6.73	6.82	6.83	7.2	7.2	6.61	6.64
TRINITY_DN10209_c0_g2	IsMYB3	1.98	2.6	2.73	8.09	6.27	7.4	4.02	3.95	3.87	8.17	8.1	8.79
TRINITY_DN10230_c0_g1	IsMYB4	0.73	0.86	0.68	6.1	5.41	6.52	6.17	7.24	8.56	0.16	0.06	0.14
TRINITY_DN10707_c0_g1	IsMYB5	10.85	11.79	12.85	0	0	0	0.1	0	0	0	0	0
TRINITY_DN10991_c0_g1	IsMYB6	1.43	1.28	1.3	9.13	8.38	7.37	0.41	0.18	0.19	3.53	3.55	2.82
TRINITY_DN11038_c0_g1	IsMYB7	3.45	2.78	2.1	8.18	8.13	6.83	3.45	3.63	1.99	2.97	1.72	2
TRINITY_DN11323_c0_g1	IsMYB8	24.91	23.17	23.49	20.65	16.48	18.15	8.39	7.49	8.03	6.63	6.88	7.59
TRINITY_DN11326_c0_g1	IsMYB9	1.48	1.54	1.37	5.48	5.1	4.87	1.62	1.66	2.26	2.77	2.37	1.92
TRINITY_DN11525_c0_g1	IsMYB10	0	0.08	0.1	1.53	1.26	1.13	0.99	0.9	1.68	3.89	3.73	3.54
TRINITY_DN12385_c0_g1	IsMYB11	30.38	23	26.68	0	0	0	0.4	0.17	0.35	0.15	0.84	0.21
TRINITY_DN12385_c1_g2	IsMYB12	7.68	6.37	7.47	0	0.47	0	0	0	0	0.2	0.22	0.13
TRINITY_DN12647_c0_g1	IsMYB13	0.1	0.1	0.06	2.34	2.18	1.88	2.58	2.42	2.73	1.02	1.03	1.5
TRINITY_DN12647_c0_g2	IsMYB14	1.22	1.56	1.4	1.17	1.36	1.46	1.74	2.5	1.91	1.04	1.55	1.27
TRINITY_DN12728_c0_g1	IsMYB15	30.19	27.66	32.83	0	0	0	0	0	0	2.74	2.19	2.02
TRINITY_DN12728_c1_g1	IsMYB16	7.72	8.23	8.18	0.54	0.69	0.65	2.36	2.42	1.94	5.4	4.9	6.91
TRINITY_DN1320_c0_g2	IsMYB17	13.33	13.62	14.63	7.13	7	6.61	7	6.44	5.65	4.97	4.67	4.25
TRINITY_DN13371_c0_g1	IsMYB18	5.2	5.5	5.35	0.13	0.18	0.06	0.13	0.06	0	0.71	0.64	0.54
TRINITY_DN13405_c0_g1	IsMYB19	7.34	5.85	7.82	0	0	0	0	0	0	0	0	0
TRINITY_DN13721_c0_g1	IsMYB20	2.18	1.5	2.48	0.8	0.64	0.62	0.4	0.3	0.37	3.56	3.73	4.03
TRINITY_DN13786_c0_g2	IsMYB21	20.51	19.77	21.73	25.55	23.33	23.22	20.52	22.06	20.49	21.59	20.28	22.18
TRINITY_DN13786_c0_g3	IsMYB22	5.33	4.19	3.9	1.08	0.86	0.28	0.21	0.27	0.46	1.04	0.83	0.11
TRINITY_DN13786_c1_g1	IsMYB23	1.49	1.71	1.28	3.98	3.74	3.79	0.53	0.66	0.82	1.69	1.93	2.58
TRINITY_DN13786_c2_g1	IsMYB24	1.98	2.53	2.39	5.87	5.77	5.03	4.72	3.94	5.26	2.95	4.12	3.87
TRINITY_DN14228_c0_g1	IsMYB25	1.68	2.1	1.01	0.24	0.15	0.42	1.35	2.18	0.83	2.08	1.58	2.62
TRINITY_DN14595_c0_g1	IsMYB26	0.66	0.17	0.58	2.46	2.91	1.17	0.76	0.9	0.39	1.36	1.2	1.07
TRINITY_DN14731_c0_g2	IsMYB27	59.68	53.6	58.76	15.01	13.71	12.71	5.97	6.04	6.46	12.29	10.69	10.66
TRINITY_DN14820_c0_g1	IsMYB28	12.14	11.85	13.17	21.94	20.79	19.55	12.21	11.07	13.03	16.69	16.43	17.31
TRINITY_DN14822_c0_g1	IsMYB29	3.43	2.16	2.49	0	0	0	0	0	0	0	0	0
TRINITY_DN15059_c0_g1	IsMYB30	177.7	163.44	174.27	16.12	13.42	13.33	6.61	5.83	6.53	75.06	73.17	74.84
TRINITY_DN1528_c0_g1	IsMYB31	6.6	5.09	5.8	3.22	1.85	2.96	3.4	4.49	3.5	3.61	3.39	4.54
TRINITY_DN15294_c0_g1	IsMYB32	1.88	1.06	1.21	0	0	0	0	0	0	0.38	0.56	0.7
TRINITY_DN1554_c0_g2	IsMYB33	13.28	11.75	11.77	13.89	13.39	12.31	14.15	16.61	14.52	19.65	19.49	17.76
TRINITY_DN1554_c0_g3	IsMYB34	0.39	0.41	0.92	1.95	0.51	0.63	0.41	0.6	0.85	0.31	1.03	1.42
TRINITY_DN1570_c0_g2	IsMYB35	29.4	27.42	28.46	18.66	15.19	14.65	14.94	13.74	13.54	21.74	20.87	22.2
TRINITY_DN1581_c0_g1	IsMYB36	147.45	132.82	142.83	27.01	22.05	23.12	9.46	11.67	10.41	39.44	39.67	37.35
TRINITY_DN1581_c1_g1	IsMYB37	11.06	10.73	14.19	11.58	8.78	9.82	9.16	9.54	10.12	11.51	10.53	11.24
TRINITY_DN1581_c1_g2	IsMYB38	1.06	0.77	2.26	0	0.13	0.46	0	0	0	0	0.06	0
TRINITY_DN15978_c0_g2	IsMYB39	20.79	15.89	17.19	29.01	24.87	23.54	18.45	21.19	19.92	27.6	27.2	26.6
TRINITY_DN15978_c0_g3	IsMYB40	1.17	1.49	1.91	18.71	17.54	17.01	1.88	1.98	1.96	6.25	6.56	6.14
TRINITY_DN16400_c0_g1	IsMYB41	16.15	14.06	15.96	1.1	1.17	0.96	1.41	0.93	1.19	0.04	0	0
TRINITY_DN17017_c0_g1	IsMYB42	1.11	0.82	0.39	0.49	0.09	0.09	1.24	1.2	1.4	3.87	4.83	4.69
TRINITY_DN17017_c0_g2	IsMYB43	0.52	0.51	0.2	0	0	0	0	0	0.67	1.29	0.93	2.14
TRINITY_DN17453_c0_g3	IsMYB44	72.07	70.24	73.41	42.21	36.16	36.6	34.36	33.65	32.59	50.74	48.62	48.33
TRINITY_DN17458_c0_g1	IsMYB45	2.36	1.14	1.85	2.92	3.51	2.75	2.21	1.9	2.32	1.92	2.52	2.08
TRINITY_DN17714_c1_g1	IsMYB46	17.77	17.68	18.75	11.75	11.1	10.81	4.63	4.29	3.8	12.06	10.66	9.47
TRINITY_DN17714_c2_g1	IsMYB47	36.31	30.44	35.08	41.59	33.74	32.11	18.8	24.76	19.91	37.23	37.45	34.09
TRINITY_DN17714_c3_g1	IsMYB48	12.26	11.08	10.58	2.53	1.52	1.86	3.37	2.57	2.8	11.81	9.29	12.64
TRINITY_DN18286_c0_g1	IsMYB49	51.19	44.86	50	52.31	45.68	42.57	51.65	48.8	48.2	52.77	53.16	56.06
TRINITY_DN18363_c0_g1	IsMYB50	3.6	2.97	4.24	6.83	4.77	5.83	4.78	5.01	6.05	63.5	64.17	65.7
TRINITY_DN18363_c0_g2	IsMYB51	0.08	0.48	0	6.71	7.2	6.16	0.16	0	0.22	0.25	0.14	0
TRINITY_DN1869_c0_g1	IsMYB52	0.38	0.07	0.27	7.69	6.93	7.85	1.51	1.21	1.32	1.12	1.64	1.2
TRINITY_DN1994_c0_g3	IsMYB53	17.02	15.24	15.8	14.29	13.24	11.76	13.63	13.28	14.54	20.69	21.8	21.52
TRINITY_DN1994_c0_g5	IsMYB54	0	0.72	0.46	0	1.03	0.71	0	0	0	0.85	2.99	0.88
TRINITY_DN2049_c0_g2	IsMYB55	3.16	2.49	3.81	0	0	0.11	0	0	0	0.62	0.43	0.26
TRINITY_DN2055_c0_g1	IsMYB56	4.19	1.69	3.82	1.74	3.44	4.37	3.83	1.73	2.92	6.74	3.29	4.86
TRINITY_DN21127_c0_g1	IsMYB57	4.5	4.35	6.08	0	0	0	0	0	0	0	0	0
TRINITY_DN21733_c0_g1	IsMYB58	1.85	0	0	0	0	0	0	0	0	0	0	0
TRINITY_DN21733_c0_g2	IsMYB59	0.35	0.1	0.29	1.27	0.8	0.23	0.65	0.58	0.37	0.16	0	0.1
TRINITY_DN21733_c0_g3	IsMYB60	0.53	0.52	0	0.56	0.5	1.52	0	1.47	3.81	0	0.98	0
TRINITY_DN22076_c0_g2	IsMYB61	0.2	0.1	0	0.1	0.18	0	1.1	0.88	0.36	0.15	0	0.1
TRINITY_DN2241_c0_g4	IsMYB62	31.08	26.39	29.35	13.36	11.9	11.26	18.94	19.31	19.85	13.4	13.16	13.04
TRINITY_DN22993_c0_g2	IsMYB63	0.74	0.73	1.15	0.14	0.31	0	0.07	0.36	0.18	0	0	0.21
TRINITY_DN2304_c0_g1	IsMYB64	4.86	4.05	5.04	5.62	4.87	4.94	5.54	4.52	5.09	8.72	8.57	8.62
TRINITY_DN2304_c0_g2	IsMYB65	3.92	3.78	3.24	4.89	5.77	4.43	3.87	4.01	4.04	8.1	8.09	8.29
TRINITY_DN2358_c0_g1	IsMYB66	28.52	30.39	27.98	24.38	23.73	20.39	18.19	18.59	20.67	24.75	22.71	24.77
TRINITY_DN23614_c0_g1	IsMYB67	2.9	2.62	2.77	2.69	2.28	2.52	0.56	0.73	0.72	0.8	0.61	0.59
TRINITY_DN23614_c0_g2	IsMYB68	0.12	0.06	0.27	6.91	6.08	4.84	0.31	1.1	0.11	0.23	0.21	0.29
TRINITY_DN23614_c0_g3	IsMYB69	0.03	0.03	0	2.1	1.48	0.96	0.2	0.71	0.64	0.18	0.22	0.24
TRINITY_DN24026_c0_g1	IsMYB70	2.02	1.49	1.62	0.1	0.06	0.03	0	0	0.06	0.42	0.67	0.63
TRINITY_DN2486_c0_g1	IsMYB71	0.41	0.36	0.67	3	2.64	2.67	3.76	3.6	3.55	10.53	12.08	9.88
TRINITY_DN24876_c0_g1	IsMYB72	14.8	13.05	14.23	54.95	49.98	44.33	41.36	42.28	43.07	26.24	28.83	27.92
TRINITY_DN2545_c0_g1	IsMYB73	2.68	3.42	3	23.53	22.07	20.75	38.51	36.68	35.28	5.73	6.18	6.83
TRINITY_DN2545_c1_g1	IsMYB74	7.08	7.29	8.41	29.99	24.37	25.63	81.5	84.59	79.81	16.44	15.3	15.66
TRINITY_DN25936_c0_g1	IsMYB75	0.26	1.78	1.17	0	0	0.24	0	0	0	0	0	0
TRINITY_DN26064_c0_g1	IsMYB76	46.79	44.51	48.21	4.04	3.09	3.89	21.75	22.84	21.44	7.24	7.59	7.29
TRINITY_DN2818_c0_g1	IsMYB77	19.13	19.71	22.05	22.78	18.57	18.68	16.5	16.85	16.74	20.18	21.25	23.46
TRINITY_DN2846_c0_g1	IsMYB78	30.14	25.08	28.43	1.99	1.61	1.89	12.53	11.33	11.73	42.9	40.4	40.86
TRINITY_DN28693_c0_g1	IsMYB79	0.09	0	0	1.34	0.83	0.74	0.18	0.24	0	0.28	0.16	0.19
TRINITY_DN2876_c0_g1	IsMYB80	12.52	9.86	11.12	44.57	38.66	36.36	20.33	19.17	21.61	20.55	22.45	18.87
TRINITY_DN2876_c0_g2	IsMYB81	3.31	3.84	4.23	17.03	14.16	12.31	23.33	24.82	20.64	10.5	9.95	9.02
TRINITY_DN2880_c0_g1	IsMYB82	10.39	9.56	8.93	155.9	139.38	128.24	23.91	25.48	21.46	40.24	39.41	36.88
TRINITY_DN28937_c0_g3	IsMYB83	1.2	0.09	0.21	1.58	1.46	1.03	0.09	0.08	0	1.22	1.64	1.65
TRINITY_DN30456_c0_g2	IsMYB84	0	0	0	3.52	2.7	2.4	4.3	3.09	3	0.41	0.63	0.49
TRINITY_DN3116_c0_g2	IsMYB85	9.91	8.07	8.06	15.85	13.14	14.47	4.28	4.35	3.65	12.41	12.92	12.86
TRINITY_DN31205_c0_g3	IsMYB86	3.24	2.16	2.76	0	0.28	0.37	0.1	0	0.09	0	0.09	0
TRINITY_DN3174_c0_g1	IsMYB87	0	0	0.24	35.84	30.72	27.91	65.37	65.1	61.74	0.34	0.19	0.45
TRINITY_DN3174_c0_g2	IsMYB88	0	0.07	0	6.73	6.43	5.03	7.77	10.88	7.57	0.05	0.31	0.36
TRINITY_DN32189_c0_g1	IsMYB89	2.98	1.62	2.28	0.84	0.28	0	0.13	0	0.17	0	0.22	0.2
TRINITY_DN3236_c0_g1	IsMYB90	157.47	145.85	158.3	122.93	101.79	102.28	124.1	124.18	124.94	164.88	168.19	159.77
TRINITY_DN32443_c0_g1	IsMYB91	2.39	1.65	3.47	0	0	0.09	0	0	0	0.07	0	0
TRINITY_DN32443_c0_g2	IsMYB92	2.17	2.35	1.92	0.05	0.09	0.09	1.28	1.68	1.66	0	0.17	0.6
TRINITY_DN32443_c0_g3	IsMYB93	0.27	0.05	0	1.79	1.33	1.52	0.59	0.45	0.33	1.32	1.22	1.46
TRINITY_DN3303_c0_g1	IsMYB94	30.45	26.84	27.66	60.84	51.25	51.36	42.08	44.06	42.38	79.18	82.35	81.7
TRINITY_DN33941_c0_g2	IsMYB95	22.47	20.37	24.61	6.57	5.56	6.37	15.09	13.91	13.99	28.04	27.83	27.41
TRINITY_DN3496_c0_g1	IsMYB96	63.97	57.81	62.78	34.23	29.04	28.94	43.63	43.26	45.09	55.69	54.23	53.07
TRINITY_DN36038_c0_g1	IsMYB97	36.22	32.55	37.08	30.31	31.24	28.32	20.21	20.64	20.36	34.94	31.9	35.95
TRINITY_DN37824_c0_g1	IsMYB98	0.91	0.49	0.66	1.08	0.89	1.14	0.93	0.85	1.05	0.39	0.33	0.38
TRINITY_DN3789_c0_g2	IsMYB99	111.71	104.68	109.08	21.92	19.12	18.66	11.92	11.76	11.5	29.74	29.73	29.14
TRINITY_DN3829_c0_g1	IsMYB100	2.06	1.56	1.92	7.51	6.33	6.12	0.54	0.65	0.98	1.54	1.93	1.88
TRINITY_DN38751_c0_g2	IsMYB101	7.48	6.55	6.75	5.33	4.88	4.34	3.8	2.61	3.11	8.65	7.42	9.62
TRINITY_DN4084_c0_g2	IsMYB102	55.62	48.72	58.93	30.42	26.18	23.29	19.83	23.2	22.97	28.21	28.76	27.99
TRINITY_DN4131_c0_g1	IsMYB103	45.24	42.94	48.12	10.96	9.06	9.43	2.54	2.44	1.87	2.96	2	2.91
TRINITY_DN4181_c0_g2	IsMYB104	11.09	9.61	10	9.46	8.41	8.96	16.36	16.36	16.49	6.38	5.45	6.01
TRINITY_DN4273_c0_g2	IsMYB105	0.75	0.68	0.57	11.04	9.78	7.95	2.42	2.39	2.04	4.07	4.47	4.14
TRINITY_DN4273_c1_g1	IsMYB106	4.13	4.48	3.54	15.36	13.01	13.34	8.14	9.41	8.93	5.38	5.06	5.65
TRINITY_DN4273_c1_g2	IsMYB107	0.61	0.42	0.64	22.41	18.37	20.06	8.23	8.77	8.31	2.91	2.4	2.94
TRINITY_DN4273_c1_g4	IsMYB108	0.22	0.34	0.37	1.97	2.77	2.25	2.04	1.51	1.26	3.37	3.02	3.21
TRINITY_DN4336_c0_g1	IsMYB109	13.06	12.49	14.39	19.39	16.7	17.44	12.74	12.73	13.26	23.19	21.23	21.05
TRINITY_DN434_c0_g1	IsMYB110	2.98	2.63	4.08	5.14	4.87	4.1	3.98	4.79	5.63	8.59	8.34	8.69
TRINITY_DN4518_c0_g1	IsMYB111	2.03	1.66	2.16	21.5	17.73	16.06	11.52	11.55	11.45	15.32	15.48	16.75
TRINITY_DN4531_c0_g2	IsMYB112	0.58	0.39	0.57	7.01	3.7	5.33	5.38	5.91	4.52	5.15	5.8	5.58
TRINITY_DN4575_c0_g2	IsMYB113	7.1	6.51	7.4	24.16	23.59	22.14	6.38	6.81	6.67	18.36	18.52	19.4
TRINITY_DN4582_c0_g1	IsMYB114	90.23	83.3	92.33	57.34	48.28	50.83	48.9	48.08	44.63	53.46	55.03	56.11
TRINITY_DN4600_c0_g1	IsMYB115	18.6	15.54	15.79	40.5	35.28	36.93	48.86	49.21	51.46	45.24	47.61	46.76
TRINITY_DN4712_c0_g2	IsMYB116	2.71	1.78	2.24	28.76	22.63	23.06	10.49	11.24	9.66	71.23	68.96	66.74
TRINITY_DN47403_c0_g1	IsMYB117	1.16	1.15	1.51	1.33	0.93	1.22	1.95	2.47	2.18	0.52	0.51	0.47
TRINITY_DN4801_c0_g1	IsMYB118	14.56	15.15	18.79	15.02	13.93	14	7.78	6.4	6.61	15.16	19.61	17.88
TRINITY_DN4801_c0_g2	IsMYB119	0.66	0.55	0.41	0.66	0.68	0.72	0.54	0.63	0.59	1.48	1.44	1.46
TRINITY_DN4801_c1_g1	IsMYB120	5.26	4.01	4.85	16.45	13.69	13.47	10.28	11.75	11.15	11.13	10.93	10.23
TRINITY_DN51276_c0_g3	IsMYB121	1.07	0.96	0.72	1.52	1.42	0.85	0.4	0.2	0.44	1.04	0.75	1.14
TRINITY_DN52540_c0_g1	IsMYB122	2.98	3.18	2.99	0	0	0	0	0	0	0	0	0
TRINITY_DN5280_c0_g1	IsMYB123	96.13	92.41	103.67	81.22	72.32	72.25	54.8	51.21	51.72	79.01	78.27	83.01
TRINITY_DN53236_c1_g2	IsMYB124	20.09	19.91	27.97	5.6	5	6.22	9.78	11.46	10.31	9.23	6.24	7.49
TRINITY_DN5457_c0_g1	IsMYB125	20.55	16.07	17.83	47.35	44.17	42.56	35.57	33.51	35.85	53.92	53.73	51.08
TRINITY_DN5689_c0_g1	IsMYB126	0.18	0.25	0.17	12.4	11.35	10.21	3.87	3.61	3.24	2.02	1.94	2.22
TRINITY_DN5780_c0_g1	IsMYB127	12.68	11.46	13.09	25.82	23.07	22.99	30.53	27.99	27.99	31.03	31.55	30.08
TRINITY_DN5887_c0_g1	IsMYB128	8.27	7.5	8.23	8.48	9.39	9.34	5.68	6.26	5.58	13.48	13.64	11.85
TRINITY_DN59653_c0_g1	IsMYB129	0.23	0	0	1.4	0.21	0.64	0	0	0	0.18	0.2	0.25
TRINITY_DN6050_c0_g1	IsMYB130	4.04	3.07	3.33	108.56	97.9	92.83	61.82	63.39	65.47	125.98	124.2	114.83
TRINITY_DN6149_c0_g1	IsMYB131	88.47	78.13	86.88	13.51	11.6	11.9	25.88	27.58	27.36	54.54	55.33	55.88
TRINITY_DN6149_c0_g3	IsMYB132	5.88	5.23	5.64	0.75	0.66	0.47	2.32	1.98	1.97	1.39	1.25	1.58
TRINITY_DN62264_c0_g1	IsMYB133	1.37	2.23	1.26	0	0	0	0	0	0	0	0	0
TRINITY_DN6234_c0_g1	IsMYB134	5.63	4.32	3.86	18.98	12.35	9.63	9.68	14.79	9.14	15.36	11.3	9.01
TRINITY_DN6289_c0_g1	IsMYB135	155.03	145.6	155.16	77.82	70.67	75.06	88.14	93.25	91.83	148.7	149.37	146.86
TRINITY_DN630_c0_g2	IsMYB136	47.94	44.18	47.59	22.68	18.55	19.28	25.81	25.78	27.17	39.06	38.83	37.8
TRINITY_DN63163_c0_g1	IsMYB137	1.92	1.78	1.39	0.32	0.84	0.42	0.96	1.26	0.94	0.1	0	0.07
TRINITY_DN6386_c0_g1	IsMYB138	1.19	1.11	1.27	3.61	2.82	2.7	1.9	1.8	2.51	4.3	4.21	4.21
TRINITY_DN63946_c0_g1	IsMYB139	3.26	1.07	0.41	0	0	0	0	0	0.36	0	0	0
TRINITY_DN6403_c0_g1	IsMYB140	7.46	6.14	5.37	25.39	22.62	22.01	13.74	13.17	13.71	20.42	20.97	19.09
TRINITY_DN6533_c0_g2	IsMYB141	69.92	61.69	67.64	3.83	3.65	4.24	5.11	5.1	4.95	25.92	25.65	27.74
TRINITY_DN67326_c0_g1	IsMYB142	0	0.21	0	0.65	0.67	0.93	0.43	0.26	0.79	0.11	0	0
TRINITY_DN6962_c0_g1	IsMYB143	1.47	1.06	1.52	1.07	0.36	1.05	0.36	0.33	0.76	0.46	0.33	0.27
TRINITY_DN6962_c0_g2	IsMYB144	17.78	16.66	20.4	13.3	11.57	11.84	5.72	5.96	5.9	2.88	2.88	2.46
TRINITY_DN705_c0_g1	IsMYB145	96.94	91.24	98.61	30.97	27.48	26.21	10.24	13.37	12.67	40.55	39.85	37.63
TRINITY_DN71953_c0_g1	IsMYB146	0.15	0.51	0.25	0	0	0.07	0.81	0.39	1.01	0.17	0.07	0.31
TRINITY_DN73494_c0_g1	IsMYB147	0.08	0.15	0	0.68	1.27	0.98	0.23	0.2	0.34	0.76	0.6	1.02
TRINITY_DN7398_c0_g1	IsMYB148	40.52	37.56	42.75	1.04	0.41	0.64	0.77	1.1	0.7	0.14	0.38	0.43
TRINITY_DN7499_c0_g1	IsMYB149	28.01	26.13	28.78	16.83	13.82	14.38	19.37	21.76	21.25	17.33	15.57	15
TRINITY_DN76122_c0_g1	IsMYB150	0.16	0.16	0.36	0.97	1.04	0.52	0.8	0.43	0.22	0.99	1.63	2.34
TRINITY_DN7862_c0_g1	IsMYB151	0.34	0.3	0.29	8.89	8.1	7.26	9.65	8.98	9.45	22.26	21.65	19.85
TRINITY_DN8201_c0_g1	IsMYB152	26.63	24.53	27.74	27.59	25.22	24.6	25.8	28.29	27.62	23.91	23.85	21.99
TRINITY_DN82265_c0_g1	IsMYB153	1.5	0.83	0.57	0	0	0	0.18	0.45	0.47	0	0	0
TRINITY_DN8257_c0_g1	IsMYB154	0.6	0.7	0.87	2.14	2.14	1.96	0.81	0.92	0.45	2.63	4.63	4.23
TRINITY_DN8527_c0_g2	IsMYB155	26.42	23.42	25.15	14.09	12.17	11.97	16.66	19.57	17.08	14.6	16.45	16.23
TRINITY_DN8687_c0_g1	IsMYB156	0.62	0.57	0.5	5.33	3.51	3.65	0	0.05	0.05	12.28	14.03	14.27
TRINITY_DN87290_c0_g1	IsMYB157	0.61	0.71	0.58	0	0.1	0.09	0.73	0.27	0.57	0.32	0.18	0.32
TRINITY_DN886_c0_g1	IsMYB158	79.19	74.95	84.33	49.6	42.24	46.18	17.25	15.67	18.54	30.13	33.7	31.39
TRINITY_DN8882_c0_g1	IsMYB159	0.35	0.15	0	0	0	0.05	0.15	0.23	0.32	4.27	3.33	3.36
TRINITY_DN8882_c0_g2	IsMYB160	0	0	0	0	0	0	0	0	0	4.89	0.96	2.56
TRINITY_DN8882_c1_g1	IsMYB161	3.5	2.32	5.61	0.21	0.1	1.04	0.21	0.19	0.72	0.66	0.71	0.85
TRINITY_DN89238_c0_g1	IsMYB162	0	0	0	0	0	5.87	0	0	0	0	0	0
TRINITY_DN902_c0_g1	IsMYB163	2.9	2.36	2.63	16.09	12.88	14.76	2.22	1.39	2.24	1.41	0.93	1.77
TRINITY_DN9045_c0_g1	IsMYB164	19.67	16.46	16.1	16.11	14.57	14.01	40.39	37.62	39.19	25.32	25.7	23
TRINITY_DN9186_c0_g1	IsMYB165	4.32	2.92	4.75	26.7	21.37	21.18	10.05	10.95	10.11	16.76	16.99	15.89
TRINITY_DN9186_c0_g2	IsMYB166	6.93	7.4	7.39	3.99	4.95	4.13	1.83	1.51	2.57	5.63	5.56	4.15
TRINITY_DN930_c0_g1	IsMYB167	381.93	350.93	383.82	28.36	23.35	25.67	47.5	51.26	47.96	39.88	41.65	42.27
TRINITY_DN9393_c0_g3	IsMYB168	35.78	35.49	37.08	17.21	14.64	14.21	20.88	19.76	19.87	35.22	33.94	36.27
TRINITY_DN9604_c0_g1	IsMYB169	26.99	41.13	25.12	0.8	3.15	1.2	0.41	0.45	0.34	0.26	0.45	0.4
TRINITY_DN9604_c0_g2	IsMYB170	7.06	5.46	6.29	0.93	0.56	0.63	0.91	0.98	0.86	5.23	6.1	6.98
TRINITY_DN9604_c0_g3	IsMYB171	25.1	22.49	20.56	0.65	0.37	0.58	0.1	0	0	0	0.27	0.26
TRINITY_DN9986_c0_g2	IsMYB172	0.14	0	0.31	0.28	0.26	0.51	1.01	0.87	0.64	1.93	1.72	1.63
TRINITY_DN1046_c0_g1	IsNAC1	945.39	875.7	946.25	61	54.08	52.1	118.49	119.04	119.62	27.93	26.51	27.17
TRINITY_DN1046_c0_g2	IsNAC2	184.54	166.96	185.8	36.64	33.86	34.17	60.13	59.89	59.39	22.84	22.37	23.48
TRINITY_DN11078_c0_g1	IsNAC3	8.38	7.82	9.22	8.93	9.39	8.89	13.64	14.29	13	11.22	10.46	9.53
TRINITY_DN11123_c0_g1	IsNAC4	3.23	2.16	3.27	0.22	0.27	0.16	0.04	0	0	0.28	0.88	0.56
TRINITY_DN11123_c1_g1	IsNAC5	4.94	6.46	5.67	3.37	3.93	3.1	0.05	0.13	0.56	1.73	2.31	3.77
TRINITY_DN11123_c2_g1	IsNAC6	0	0	0	0	0	0	0	2.27	8.4	0	0	0
TRINITY_DN11785_c0_g1	IsNAC7	0.24	0.28	0.33	2.62	2.47	1.81	4.52	5.22	4.65	2.32	2.6	2.26
TRINITY_DN11785_c0_g3	IsNAC8	0.31	0.39	0.27	0.16	0.04	0.15	6.87	6.84	6.6	0.55	0.35	0.41
TRINITY_DN11863_c0_g1	IsNAC9	0.08	0	0.06	8.85	8.04	10.12	0.86	1.51	0.94	0.13	0.61	0.42
TRINITY_DN11869_c0_g2	IsNAC10	11.68	11.43	12.4	1.1	0.85	0.93	4.32	3	3.58	0.21	0.56	0.29
TRINITY_DN12190_c0_g1	IsNAC11	3.73	4.78	6.12	2.03	1.06	4.04	0.14	0.24	0.37	0.38	0.24	0.11
TRINITY_DN12718_c0_g1	IsNAC12	1412.81	1314.62	1413.98	285.4	252.5	241.03	394.27	428.73	414.6	445.22	428.83	428.74
TRINITY_DN1300_c0_g1	IsNAC13	3.73	3.52	3.9	16.39	15.11	14.04	2.31	2.39	2.43	15.45	15.09	14.89
TRINITY_DN1300_c0_g2	IsNAC14	0.48	0.5	0.23	0.13	0.26	0.33	0.39	0.54	0.48	1.06	0.98	0.96
TRINITY_DN1300_c0_g6	IsNAC15	1.28	1.57	1.53	0.5	0.46	0.46	1.25	1.56	1.77	3.94	4.35	3.77
TRINITY_DN13436_c0_g1	IsNAC16	88.63	80.29	87.57	3.58	4.38	3.53	5.1	4.33	4.98	24.21	24.46	23.26
TRINITY_DN13570_c0_g1	IsNAC17	0.86	0.44	0.58	0.27	0.17	0.17	0.73	0.72	0.92	1.07	1.03	1.16
TRINITY_DN14344_c0_g1	IsNAC18	80.08	71.72	78.4	59.2	49.92	49.13	73.59	74.68	78.9	48.25	45.72	41.82
TRINITY_DN14554_c0_g1	IsNAC19	12.31	11.04	11.76	8.35	6.68	7.32	1.38	1.06	1.53	3.04	2.72	3.22
TRINITY_DN15103_c0_g1	IsNAC20	29.04	24.69	27.77	16.1	15.48	14.98	15.41	15.75	15.93	13.16	15.17	13.74
TRINITY_DN1571_c3_g1	IsNAC21	208.06	195.3	214.11	142.61	121.25	122	208.39	214.71	211.87	138.32	141.76	135.28
TRINITY_DN1608_c1_g1	IsNAC22	2.14	2.05	1.6	7.41	5.32	4.59	7.82	6.71	6.73	11.69	11.07	12.37
TRINITY_DN16756_c0_g1	IsNAC23	19.36	15.45	17.51	14.96	10.98	12.05	30.48	30.12	27.84	19.85	20.62	21.09
TRINITY_DN16756_c1_g1	IsNAC24	3.12	2.55	2.63	0.72	0.77	0.71	0.15	0.14	0.23	0.04	0.23	0.27
TRINITY_DN16756_c1_g2	IsNAC25	1.71	2.9	2.43	1.52	4.44	2.48	1.04	1.29	3.22	2.65	2.77	2.85
TRINITY_DN17571_c0_g1	IsNAC26	865.12	788.31	856.74	11.31	9.8	8.97	17.05	17.23	16.75	45.33	44.71	46.05
TRINITY_DN17627_c0_g1	IsNAC27	0	0.26	0.88	0	0.48	0	0.29	0	0.99	0	0.46	0
TRINITY_DN1812_c0_g1	IsNAC28	143.54	139.32	153.97	99.25	88.8	85.19	80.51	78.91	81.13	98.06	94.13	95.43
TRINITY_DN18757_c0_g2	IsNAC29	117.63	113.93	125.74	4.52	3.99	4.21	14.12	15.6	16.39	15.13	12.8	12.11
TRINITY_DN21543_c0_g1	IsNAC30	0.67	0.83	1.24	0.75	1.01	0.73	1.52	1.37	1.29	3.31	3.29	2.23
TRINITY_DN21543_c0_g2	IsNAC31	1.27	0.97	1.47	0.05	0	0.12	1.27	0.83	0.66	2.62	2.61	1.92
TRINITY_DN22071_c0_g1	IsNAC32	0.07	0.14	0.08	0.95	0.68	0.74	0.15	0.45	0.2	0.62	0.39	0.46
TRINITY_DN22071_c0_g2	IsNAC33	0	0	0	0	0.26	1.3	0	0	0	0.43	0.25	0
TRINITY_DN2366_c0_g1	IsNAC34	3272.4	2946.86	3243.9	555.87	485.49	491.68	935.56	971.26	957.49	741.55	731.88	739.8
TRINITY_DN24088_c0_g1	IsNAC35	0.3	0.29	0	0	0	0.84	0.68	0	0	0	0	0.68
TRINITY_DN25085_c0_g1	IsNAC36	4.72	5	5.04	0.5	0.68	0.5	0	0	0.07	0.06	0.14	0.28
TRINITY_DN28440_c0_g1	IsNAC37	0.19	0.26	0.25	1.98	1.56	1.1	0.29	0.5	0.34	0.2	0.4	0.08
TRINITY_DN29702_c0_g2	IsNAC38	0.13	0	0	2.84	1.74	1.86	2.36	2.03	2.6	1.24	1.54	1.14
TRINITY_DN29888_c0_g1	IsNAC39	0.85	1.68	0.32	2.34	1.32	0.27	0.32	0	0	0	0	0
TRINITY_DN3073_c0_g1	IsNAC40	336.6	304.46	334.92	4.34	3.84	4.16	0.43	0.45	0.72	46.2	46.9	43.43
TRINITY_DN3118_c0_g2	IsNAC41	59.72	56.28	64.45	60.46	53.42	48.61	14.67	13.49	14.74	20.06	19.55	21.07
TRINITY_DN3433_c0_g1	IsNAC42	137.62	125.04	136.86	74.52	62.62	62.13	39.56	41.87	40.56	78.6	76.23	78.41
TRINITY_DN3953_c0_g1	IsNAC43	59.06	55.59	60.23	68.2	58.31	64.56	31.92	33.66	34.05	18.79	19.38	20.68
TRINITY_DN3977_c0_g1	IsNAC44	7.52	6.32	7.71	9.55	7.96	7.93	10.48	9.06	9.6	21.32	23.39	23.95
TRINITY_DN4020_c0_g1	IsNAC45	100.17	94.78	100.2	52.87	48.5	47.23	68.39	70.17	69.04	67.98	65.92	62.34
TRINITY_DN4102_c0_g1	IsNAC46	1483.45	1345.9	1480	340.76	299.34	302.51	427.67	444.11	445.44	381.36	381.39	384.69
TRINITY_DN44792_c0_g1	IsNAC47	1.13	1.12	0.9	0.69	0.84	0.84	0	0	0	0.7	0.6	0.24
TRINITY_DN4812_c0_g1	IsNAC48	20.53	21.73	20.2	3.32	2.8	1.95	4.95	5.28	6.17	24.75	24.82	23.54
TRINITY_DN5605_c0_g1	IsNAC49	73.1	68.2	73.84	18.27	16.19	18.15	55.54	58.37	55.1	35.57	37.07	34.7
TRINITY_DN6092_c0_g3	IsNAC50	48.45	46.42	48.38	36	29.25	28.3	17.73	17.95	16.59	30.76	29.88	30.01
TRINITY_DN62932_c0_g1	IsNAC51	0.23	0.3	0.3	2.76	1.92	2.15	0.67	0.14	0.38	0.68	0.44	0.74
TRINITY_DN63614_c0_g1	IsNAC52	0.22	0.44	0.31	0.23	0.21	0.21	1.59	1.87	1.58	0.17	0.16	0.14
TRINITY_DN6671_c0_g2	IsNAC53	81.61	76.36	75.38	22.57	18.13	18.2	32.75	33.63	30.89	44.34	41.34	40.56
TRINITY_DN6704_c0_g3	IsNAC54	23.14	20.9	25.71	17.42	15.61	14.13	27.67	29.63	30.25	31.95	31.26	28.48
TRINITY_DN6801_c1_g1	IsNAC55	229.59	208.07	221.45	40.08	36.21	36.55	42.46	40.03	40.4	61.75	62.81	60.72
TRINITY_DN6801_c1_g2	IsNAC56	8.73	8.21	7.24	0.4	0.58	0.37	1.62	1.27	1.41	9.51	9.21	8.89
TRINITY_DN7145_c0_g1	IsNAC57	4.43	4.3	4.93	8.04	7.08	5.5	4.94	5.58	4.87	4.21	4.25	4.43
TRINITY_DN723_c0_g2	IsNAC58	0.31	0.62	1.06	2.37	1.59	0.87	13.14	10.04	10.16	7.36	8.86	7.56
TRINITY_DN723_c1_g1	IsNAC59	0.4	0.1	0.35	0.2	0.33	0.09	18.58	15.73	15.3	1.78	1.62	1.63
TRINITY_DN8156_c0_g3	IsNAC60	21.75	24.24	23.38	22.47	19.36	17.1	31.44	32.96	33.44	43.21	40.67	39.45
TRINITY_DN83849_c0_g1	IsNAC61	0	0	0.11	0.69	0.64	0.73	0.8	0.35	0.81	2.13	1.57	1.86
TRINITY_DN87159_c0_g1	IsNAC62	0	0	0	0	2.99	0	1.41	0	0	0	0	0
TRINITY_DN91462_c0_g1	IsNAC63	0	0	0	0.53	0.47	0.48	0	0	0	0	1.86	0
TRINITY_DN93254_c0_g1	IsNAC64	1.41	1.47	1.21	0	0	0	0	0.06	0.06	0	0.06	0.22
TRINITY_DN9346_c0_g1	IsNAC65	1.05	1	1.15	12.51	11.98	13.38	12.36	12.64	11.99	15.48	17.85	16.23
TRINITY_DN9377_c0_g1	IsNAC66	9.62	7.22	14.19	3.91	3.97	2.31	0.57	0.79	1.28	0	0.07	0.17
TRINITY_DN94266_c0_g1	IsNAC67	0.43	0.38	0.92	0.38	0.4	0.35	0.27	0.43	0.44	0.63	0.24	0.78
TRINITY_DN9432_c0_g1	IsNAC68	4.12	4.22	3.44	0.06	0.12	0.17	0.06	0.27	0.17	0.38	0.38	0.13
TRINITY_DN9432_c0_g2	IsNAC69	3.2	2.36	2.74	0.15	0.23	0.2	0.09	0.05	0	0.53	0.57	0.63
TRINITY_DN9432_c1_g1	IsNAC70	8.6	8.94	8.18	17.42	16.13	13.71	9.41	9.71	9.12	9.11	8.59	10.42
TRINITY_DN9845_c0_g2	IsNAC71	93.81	89.18	92.69	44.44	38	38	51.29	57.78	52.04	43.18	44.16	42.83
TRINITY_DN483_c0_g1	IsNFX1-1	26.05	23.39	26.57	9.64	8.45	8.86	15.89	17.25	16.84	6.43	6.37	5.48
TRINITY_DN483_c0_g3	IsNFX1-2	10.65	8.87	10.76	9.04	7.83	8.4	10.79	11.12	11.05	11.53	11.07	10.95
TRINITY_DN5800_c0_g1	IsNFX1-3	10.02	7.98	10.08	9.17	7.99	6.8	15.79	15.43	14.7	9.68	10.42	10.4
TRINITY_DN1093_c0_g1	IsNFY1	82.54	72.09	74.33	55.97	47.84	49.08	77.06	77.64	78.46	98.95	97.96	93.86
TRINITY_DN1093_c0_g2	IsNFY2	98.05	90.39	91.39	61.96	53.79	52.14	68.48	70.57	68.52	92	95.29	93.04
TRINITY_DN1121_c0_g2	IsNFY3	56.35	50.06	56.28	63.18	56.76	55.84	19.94	23.17	21.02	40.06	42.16	39.22
TRINITY_DN527_c0_g1	IsNFY4	19.01	17.76	15.05	26.1	29.51	26.28	22.43	23.1	25.62	25.14	26.54	26.03
TRINITY_DN527_c0_g3	IsNFY5	32.29	25.85	32.59	24.84	22.11	22.82	12.9	13.36	14.07	21.68	22.37	21.04
TRINITY_DN7922_c0_g1	IsNFY6	19.53	18.65	20.44	16.45	14.04	12	15.83	16.93	16.06	6.44	6.66	6.83
TRINITY_DN8858_c0_g1	IsNFY7	0.65	0.76	0.83	23.41	21.49	21	1.2	1.77	1.39	8.64	9.37	9.55
TRINITY_DN9074_c0_g2	IsNFY8	0.34	0.68	0.66	54.72	46.81	47.72	16.17	16.09	15.38	26.41	27.73	27.4
TRINITY_DN908_c1_g1	IsNFY9	40.15	39.55	40.78	93.57	84.53	83.54	53.3	59.26	55.09	83.65	82.4	73.42
TRINITY_DN1052_c0_g1	IsNinlike1	26.32	24.02	27.19	27.6	25.51	25.17	26.48	26.85	28.16	26.59	27.68	26.52
TRINITY_DN21596_c0_g1	IsNinlike2	11.12	10.31	11.03	3.1	2.38	2.86	2.99	2.87	3.12	7.43	8.36	8.02
TRINITY_DN28069_c0_g1	IsNinlike3	1.36	0	0	0	0	0	0	0.64	0	0	0	0
TRINITY_DN31289_c0_g1	IsNinlike4	25.79	22.03	25.78	8.92	8.47	7.54	9.64	9.97	10.01	20.97	20.2	20.79
TRINITY_DN31289_c1_g1	IsNinlike5	4.32	4.03	4.73	3.51	1.58	0.4	0.29	0.16	1.9	0.61	0.6	0.79
TRINITY_DN70335_c0_g1	IsNinlike6	0	0	0	0	0.32	0	2.17	1.22	0.32	0	0	0
TRINITY_DN7649_c0_g1	IsNinlike7	2.37	2.79	3.04	10.29	8.67	8.66	9	9.28	9.29	10.15	8.52	8.25
TRINITY_DN49691_c0_g1	IsNZZ/SPL	11.51	8.48	11.69	23.68	23.68	21.79	22.61	24.29	22.21	34.39	35.16	33.83
TRINITY_DN13719_c0_g1	IsSBP1	0.23	0.9	0.26	0.38	0.49	0.49	0	0	0	2.13	1.53	2.63
TRINITY_DN1503_c0_g1	IsSBP2	7.47	7.6	7.38	25.84	20.76	22.66	19.24	19.65	18.64	28.7	28.11	26.79
TRINITY_DN16407_c0_g1	IsSBP3	0.04	0.05	0.02	1.83	1.09	1.62	0.95	0.99	0.72	0.02	0.05	0.07
TRINITY_DN16407_c0_g2	IsSBP4	0	0	0	0	0	0	0	0	0	2.08	0	0
TRINITY_DN1882_c0_g1	IsSBP5	3.31	2.51	3.55	26.84	21.8	22.46	8.79	8.12	8.77	10.22	9.93	10.16
TRINITY_DN1960_c0_g1	IsSBP6	20.54	16.14	13.93	2.37	0.98	1.67	1.46	1.82	4.95	13.03	13	12.15
TRINITY_DN3226_c0_g1	IsSBP7	103.74	96.01	102.67	41.34	33.75	32.84	44.88	49.15	50.01	55.05	56.29	53.66
TRINITY_DN34094_c0_g1	IsSBP8	0.18	0.18	1.02	0.18	0.17	0.17	0	0	0	0	0.16	0
TRINITY_DN40_c0_g2	IsSBP9	24.71	22.33	24.84	28.15	23.46	24.21	25.95	25.97	26.31	49.23	47.6	47.17
TRINITY_DN419_c0_g1	IsSBP10	5.96	5.98	5.44	12.44	14.22	13.47	9.54	11.18	11.54	10.26	10.64	9.96
TRINITY_DN4446_c0_g1	IsSBP11	1.73	1.42	1.07	5.55	4.26	4.82	1.75	2.35	1.78	3.08	3.38	2.84
TRINITY_DN47234_c0_g2	IsSBP12	2.89	3.67	3.21	2.72	2.62	2.15	6.01	6.11	5.3	14.16	16.92	13.01
TRINITY_DN536_c0_g1	IsSBP13	11.84	11.59	11.98	57.28	48.19	47.21	28.58	27.96	28.83	31.02	33.13	32.65
TRINITY_DN57967_c0_g1	IsSBP14	1.92	2.51	2.18	0	0	0	0	0	0	0	0	0
TRINITY_DN87315_c0_g1	IsSBP15	8.32	6.45	7.51	0.93	0.26	0	0.09	0	0	0.5	1.06	0.58
TRINITY_DN9390_c0_g1	IsSBP16	1.53	0.8	1.28	0.68	0.66	0.6	0.08	0.37	0.28	0.49	0.72	1.09
TRINITY_DN14457_c0_g1	IsSRS1	7.45	5.65	5.61	4.39	3.07	3.91	4.26	6.11	5.11	9.05	8.25	7.55
TRINITY_DN15405_c0_g1	IsSRS2	6.61	5.3	6.68	14.47	13.59	11.69	7.09	6.03	5.04	10.32	11.63	11.69
TRINITY_DN39415_c0_g1	IsSRS3	0.7	0.23	0	0.47	0.22	0.65	0	0	0	0.72	1.66	0.26
TRINITY_DN39774_c0_g1	IsSRS4	0.41	1	0.61	13.74	13.62	14.2	5.85	5.65	5.88	1.59	2.05	1.44
TRINITY_DN57015_c0_g1	IsSRS5	0	0	0.65	0.3	0	0	0	0	0	0.89	0.77	1.31
TRINITY_DN58048_c0_g1	IsSRS6	0	0	0	2.5	1.54	1.26	0.23	0.05	0.11	0.14	0.16	0.25
TRINITY_DN9492_c1_g1	IsSRS7	1.29	1.92	3.31	0.16	1.06	0.15	0	0	0	0.13	0.14	0
TRINITY_DN10087_c0_g1	IsTCP1	37.05	33.42	37.66	2.48	1.92	2.01	2.09	2.2	2.29	7.96	7.65	7.9
TRINITY_DN10273_c0_g1	IsTCP2	8.24	8.09	8.26	0.83	0.96	1.01	0.19	0.58	0.39	0.39	0.43	0.31
TRINITY_DN10672_c1_g2	IsTCP3	47.07	41.87	44.98	3.93	3.95	4.27	2.14	2.15	2.17	20.31	21.27	19.48
TRINITY_DN15192_c0_g1	IsTCP4	2.64	2.28	2.5	0.96	1.85	1.21	1.14	1.26	0.96	1.84	2.5	1.49
TRINITY_DN21069_c0_g1	IsTCP5	4.31	3.7	3.79	0	0	0	0	0	0	0	0	0.05
TRINITY_DN21644_c0_g1	IsTCP6	4.63	5.22	5.35	0.24	0.13	0.19	0.3	0.32	0.12	15.54	15.49	13.25
TRINITY_DN23605_c0_g1	IsTCP7	8.45	7.57	8.59	23.43	20.92	19.63	11.9	11.77	10.52	19.96	21.6	22.18
TRINITY_DN24056_c0_g1	IsTCP8	0.36	0.36	0	3.55	3.87	3.76	3.01	1.53	1.24	3.08	2.96	1.52
TRINITY_DN25623_c0_g2	IsTCP9	46.09	43.37	45.02	0.07	0.11	0.07	0.1	0.03	0	1.41	1.46	1.17
TRINITY_DN31133_c0_g1	IsTCP10	17.61	14.65	18.04	13.67	11.58	12.02	4.3	4.48	3.8	12.6	14.14	15.62
TRINITY_DN33740_c0_g1	IsTCP11	8.08	6.28	7.12	1.27	0.55	0.47	0.31	0.32	0.39	0.74	0.46	0.49
TRINITY_DN33797_c0_g1	IsTCP12	50.52	44.08	49.16	0.07	0.1	0.2	0.04	0.03	0	5.3	5.31	3.61
TRINITY_DN4500_c0_g1	IsTCP13	13.94	12.96	13.73	24.74	21.11	23.68	10.48	10.52	10.97	15.36	16.23	18.16
TRINITY_DN5000_c1_g1	IsTCP14	13.52	13.32	14.17	43.42	39.02	33.46	42.59	43.92	43.41	46.97	42.07	45.72
TRINITY_DN5647_c0_g1	IsTCP15	26.12	23.4	25.93	12.74	11.83	10.54	9.76	9.92	11.01	7.79	7.74	6.78
TRINITY_DN5712_c0_g1	IsTCP16	0.7	0.44	0.76	1.5	1.58	1.67	1.33	1.78	1.67	2.45	2.56	1.76
TRINITY_DN686_c0_g1	IsTCP17	12.39	12.8	14.07	1.86	3.05	2.37	3.4	3.96	4.35	3.72	4.57	3.03
TRINITY_DN84105_c0_g1	IsTCP18	3.66	3.29	4.1	5.19	4.49	6.21	4.36	3.36	4.29	5.77	4.29	5.34
TRINITY_DN86455_c0_g1	IsTCP19	1.18	0.22	0.9	0	0	0	0	0	0	0.26	0.75	0.35
TRINITY_DN90228_c0_g1	IsTCP20	1.48	1.37	2.05	0.05	0	0.05	0	0	0	0	0.14	0
TRINITY_DN9968_c0_g1	IsTCP21	4.08	3.85	4.7	18.06	16.18	16.31	2.22	2.05	1.75	12.22	12.39	12.48
TRINITY_DN2033_c2_g1	IsWDR1	10.88	9.87	10.68	17.89	15.84	14.89	24.63	26.48	25.82	22.55	20.99	23.22
TRINITY_DN80166_c0_g1	IsWDR2	5.48	5	5.88	9.12	8.74	8.5	12.8	12.49	13.57	11.77	10.6	10.56
TRINITY_DN4682_c0_g3	IsWhirly1	25.93	25.14	27.84	39.52	37.43	35.14	17.28	22.69	17.99	26.24	29.05	23.41
TRINITY_DN8192_c0_g1	IsWhirly2	12.34	11.87	12.64	33.47	32.08	30.93	15.78	14.88	16.3	21.8	21.86	22.78
TRINITY_DN14177_c0_g1	IsWIP1	2.09	0.39	2.09	0	0	0	0	0	0	0	0.23	0
TRINITY_DN14177_c0_g2	IsWIP2	2.8	3.59	3.9	0.1	0	0.04	0	0	0	0	0	0
TRINITY_DN3549_c2_g1	IsWIP3	7.44	8.91	8.68	67.23	59.83	62.55	23.06	21.56	22.6	68.08	63.44	59.57
TRINITY_DN6468_c0_g1	IsWIP4	0.11	0.22	0.19	11.25	10.9	8.26	17.53	15.44	13.65	3.63	4.15	3.78
TRINITY_DN6468_c0_g2	IsWIP5	0	0.05	0	12.22	11.54	12.09	3.76	3.93	4.5	0.04	0	0.05
TRINITY_DN6468_c0_g3	IsWIP6	3.46	1.87	2.15	7.32	5.78	7.6	1.95	2.89	3.64	8.14	8.04	8.39
TRINITY_DN73147_c0_g1	IsWIP7	0.9	1.19	1.37	0	0	0	0	0	0	0.7	0	0.69
TRINITY_DN10090_c0_g2	IsWRKY1	18.98	17.46	17.9	3.83	3.53	1.94	3.17	5.02	4.17	7.98	6.69	6.92
TRINITY_DN1063_c0_g1	IsWRKY2	50.38	43.81	49.13	35.17	31.68	32.53	43.97	45.25	45.1	49.37	52.81	50.38
TRINITY_DN10870_c0_g1	IsWRKY3	7.34	5.54	5.55	3.1	2.41	3.21	0.38	0.44	0.67	1.07	1.52	0.74
TRINITY_DN11183_c1_g2	IsWRKY4	18.67	17.07	19.4	0.26	0.4	0.44	0.11	0.1	0	0.54	0.36	0.89
TRINITY_DN11826_c0_g1	IsWRKY5	209.65	180.53	200.27	38.99	33.65	34.59	29.93	36.64	34.04	44.17	42.91	39.93
TRINITY_DN11833_c0_g1	IsWRKY6	4.29	4.09	4.73	1.95	0.83	0.57	2.06	2.14	1.99	1.46	1.76	2.32
TRINITY_DN12139_c1_g1	IsWRKY7	50.79	46.03	51.03	28.54	25.22	25.31	19.64	19.89	19.77	86.71	85.56	85.84
TRINITY_DN12828_c0_g1	IsWRKY8	200.07	188.69	212.02	46.31	39.47	37.95	52.95	56	54.97	31.87	31.45	31.57
TRINITY_DN12836_c0_g2	IsWRKY9	32.37	27.3	29.98	72.51	62.82	63.23	107.13	104.24	108.01	26.84	25.26	26.86
TRINITY_DN1388_c0_g1	IsWRKY10	47.56	42.22	47.78	7.2	6.3	6.18	4.68	3.79	3.86	6.05	4.84	7.39
TRINITY_DN14108_c1_g1	IsWRKY11	4.32	3.06	4.28	2.03	1.11	2.04	1.28	1.6	1.51	5.08	6	5.89
TRINITY_DN14465_c0_g1	IsWRKY12	6.85	5.96	7.14	1.17	0.91	0.87	1.1	1.47	1.12	3.04	4.55	3.43
TRINITY_DN14818_c0_g2	IsWRKY13	12.18	10.67	12.74	14.31	11.79	12.37	6.35	7.79	7.14	5.16	6.14	5.72
TRINITY_DN16550_c0_g1	IsWRKY14	1.55	0.97	1.62	0.4	0.26	0.38	0	0	0.06	0	0.12	0.07
TRINITY_DN1711_c0_g1	IsWRKY15	15.1	14.93	14.72	13.49	11.57	13.27	60.55	61.53	59.3	10.73	9.29	9.99
TRINITY_DN17424_c0_g2	IsWRKY16	1.34	2.03	2.34	1.57	1.41	1.94	0.96	1.54	2.16	3.11	2.15	3.4
TRINITY_DN1868_c0_g2	IsWRKY17	41.53	39.89	41.78	14.3	12.8	12.58	12.62	12.72	12.79	8.42	9.52	8.7
TRINITY_DN19227_c0_g1	IsWRKY18	0.52	0.12	0.59	0.52	0.89	0.7	0.67	0.71	0.4	0.75	0.81	0.53
TRINITY_DN2038_c0_g3	IsWRKY19	37.16	32.29	38.64	13.48	11.93	11.52	16.11	18.26	17.04	20.72	19.75	18.49
TRINITY_DN2160_c0_g1	IsWRKY20	84.08	76.94	86.02	73.59	69.3	68.84	78.5	79.84	83.45	30.52	28.39	28.29
TRINITY_DN22633_c0_g2	IsWRKY21	12.2	9.59	12.05	12.7	10.14	10.98	22.11	23.38	22.33	16.51	16.91	16.73
TRINITY_DN23774_c0_g1	IsWRKY22	0	1.26	0	0	0.61	0	0	0	0	0	0	0.82
TRINITY_DN23774_c0_g2	IsWRKY23	2.2	1.86	1.78	0	0	0	0	0	0	0	0.28	0.36
TRINITY_DN24675_c0_g3	IsWRKY24	33.87	29.39	32.22	12.78	11.02	10.36	23.84	24.2	23.45	13.5	14.25	12.39
TRINITY_DN29402_c0_g1	IsWRKY25	1.77	1.95	1.57	0.79	0.28	0.36	0.1	0.18	0.27	0.15	0.26	0.41
TRINITY_DN3175_c0_g1	IsWRKY26	23.55	20.89	23.87	47.69	39.91	40.7	13.12	13.08	13.53	29.19	28.09	26.22
TRINITY_DN32335_c0_g1	IsWRKY27	5.69	5.73	6.11	19.19	15.81	17.52	5.01	5.05	4.98	30.17	27.96	27.85
TRINITY_DN3318_c2_g3	IsWRKY28	12.57	12.79	13.17	21.08	20.01	18.98	10.91	11.72	10.49	30.08	30.36	29.1
TRINITY_DN33904_c0_g1	IsWRKY29	7.31	6.26	5.01	2.84	1.47	1.9	1.23	1.16	1.24	6.8	7.52	6.65
TRINITY_DN34128_c1_g2	IsWRKY30	3.18	2.74	2.22	2.19	2.36	1.57	0.71	0.58	0.75	8.8	9.69	10.85
TRINITY_DN3549_c0_g1	IsWRKY31	121.68	120.68	122.98	101.6	80.99	82	127.94	159.19	148.79	135.65	126.74	118.39
TRINITY_DN3636_c0_g1	IsWRKY32	65.12	58.79	66.23	14.05	13.62	12.73	7.63	8.61	8	9.74	10.35	10.31
TRINITY_DN36554_c0_g1	IsWRKY33	0	0	0.76	0	0.64	0.65	0	1.27	2.15	0	0	0
TRINITY_DN36857_c0_g1	IsWRKY34	0.13	0.66	0.61	0	0	0.25	0	0	0	0.21	0	0.14
TRINITY_DN37024_c0_g2	IsWRKY35	2.76	1.81	3.11	13.83	11.76	12.46	22.57	23.62	23.82	1.12	1.88	1.48
TRINITY_DN37722_c0_g1	IsWRKY36	4.41	3.48	3.41	0.06	0.12	0.12	0	0	0	0.13	0.37	0
TRINITY_DN41496_c0_g1	IsWRKY37	3.14	0	0	0	0	0	0	0	0	0	0	0
TRINITY_DN41496_c0_g2	IsWRKY38	1.93	1.89	0	0	0	0	0	0	0	0	0	0
TRINITY_DN4209_c0_g1	IsWRKY39	22.54	19.18	20.36	0.98	0.98	1.13	0.42	0.19	0.68	1.64	1.03	1.48
TRINITY_DN4218_c0_g3	IsWRKY40	52.94	49.24	49.43	0.64	0.85	0.66	0.39	0.42	0.25	0.31	0.14	0.45
TRINITY_DN4218_c0_g4	IsWRKY41	6.63	7.37	7.95	0.12	0	0.11	0	0	0	0.09	0	0.36
TRINITY_DN42622_c0_g1	IsWRKY42	0	0	0	1.42	1.3	0.65	0	0	0	0.4	0.62	0.38
TRINITY_DN4290_c0_g1	IsWRKY43	283.95	245.84	275.45	74.74	63.96	69.85	160.42	167.48	158.77	69.02	64.03	67.39
TRINITY_DN44488_c0_g1	IsWRKY44	44.81	41.23	41.89	13.22	11.46	10.82	6.13	6.63	6.27	4.87	5.12	4.51
TRINITY_DN4580_c0_g1	IsWRKY45	26.24	24.47	26.07	55.8	50.5	47.99	37.96	40.14	41.57	40.76	40.42	40.22
TRINITY_DN47502_c0_g1	IsWRKY46	0.96	1.09	1.33	1.61	1.68	1.21	0.27	0.49	0.13	0.21	0.1	0.43
TRINITY_DN515_c0_g1	IsWRKY47	4.07	3.69	5.17	26.67	22.83	22.8	34.36	36.25	37.05	24.4	24.58	23.87
TRINITY_DN515_c0_g2	IsWRKY48	7.89	6.39	7.8	1.24	1.02	0.98	0.59	0.78	0.67	0.81	0.75	0.42
TRINITY_DN5190_c0_g1	IsWRKY49	55.21	52.78	60.93	5.05	3.59	3.86	6.72	8.95	7.37	1.33	1.05	1.02
TRINITY_DN5212_c0_g1	IsWRKY50	64.95	57.65	62.1	19.91	17.25	17.21	20.87	21.22	22.7	43.79	44.4	42.07
TRINITY_DN5361_c0_g1	IsWRKY51	3.16	3.59	3.7	8.25	6.95	6.46	4.07	5.12	4.41	13.75	17.17	18.22
TRINITY_DN5662_c0_g1	IsWRKY52	3.85	2.97	4.16	29.98	23.84	25.56	13.86	10.1	11.37	4.2	3.74	7.88
TRINITY_DN59133_c0_g1	IsWRKY53	66.8	61.07	67.34	25.43	21.62	22.26	30.53	31.28	32.1	12.66	13.19	12.59
TRINITY_DN60265_c1_g1	IsWRKY54	148.61	138.66	144.14	39.56	33.44	33.5	41.35	41.98	43.69	24.94	24.64	25.38
TRINITY_DN6255_c0_g1	IsWRKY55	76.98	70.93	75.49	5.42	4.8	5.19	10.9	11.52	10.6	5.99	5.39	5.41
TRINITY_DN64079_c0_g1	IsWRKY56	176.77	157.64	165.44	39.7	36.17	34.66	55.52	56.42	56.39	55.59	58.06	59.67
TRINITY_DN6443_c0_g1	IsWRKY57	28.87	30.43	27.13	0.14	0.14	0.19	0.07	0.09	0	0.28	0.14	0.11
TRINITY_DN6596_c0_g1	IsWRKY58	32.59	28.12	29.21	19.9	17.9	16.19	18.48	19.54	20.55	31.69	30.59	32.37
TRINITY_DN6766_c0_g1	IsWRKY59	0.91	0.58	1.32	15.86	15.63	13.25	12.49	14.49	12.99	13.52	14.47	17
TRINITY_DN6766_c0_g2	IsWRKY60	0.64	0.43	0.96	20.82	20.26	16.57	8.98	10.24	9.6	19.79	20.18	19.92
TRINITY_DN6766_c1_g1	IsWRKY61	0.3	0.42	0.63	20.03	17.84	17.78	13.16	14.31	13.4	22.27	17.32	18.06
TRINITY_DN7190_c1_g1	IsWRKY62	6.68	7.51	8.18	8.94	8.94	9.4	14.41	12.84	14.2	16.54	15.05	14.83
TRINITY_DN80056_c0_g1	IsWRKY63	1.64	2.2	0.93	0.36	1.2	0.54	0.6	0.21	0	0.55	0.31	0.5
TRINITY_DN8103_c0_g1	IsWRKY64	6.47	5.75	6.7	6.17	5.89	6.09	5.46	6.57	6.76	5.61	4.97	5.2
TRINITY_DN83657_c0_g1	IsWRKY65	0.93	0.79	1.1	0.9	0.32	0.45	0.07	0.4	0.12	0.75	0.79	0.6
TRINITY_DN8454_c0_g2	IsWRKY66	21.49	22.72	19.47	15.61	13.93	14.04	7.53	7.39	9.59	29.5	29.86	27.94
TRINITY_DN8561_c0_g1	IsWRKY67	0.27	0.47	0.29	12.65	10.66	9.68	73.23	74.74	73.45	0.62	0.56	0.39
TRINITY_DN8561_c0_g2	IsWRKY68	38.07	33.16	36.75	0.09	0.12	0.14	0	0.17	0.03	0.32	0.64	0.35
TRINITY_DN8728_c0_g1	IsWRKY69	7.19	9.63	9.96	1.16	0.99	0.41	4.35	5.28	4.37	0.96	0.63	1.11
TRINITY_DN948_c0_g2	IsWRKY70	149.38	138.48	141.86	167.2	143.93	142.68	193.24	189.54	194.88	142.62	140.49	138.12
TRINITY_DN9630_c0_g1	IsWRKY71	4.64	4.73	6.48	1.11	0.75	0.22	1.1	1.31	1.68	1.43	1.22	0.3
TRINITY_DN9998_c0_g1	IsWRKY72	5.26	4.3	3.95	0.44	0.27	0.4	0.29	0.71	0.73	0.56	0.51	0.53
TRINITY_DN10575_c0_g1	IsZF-HD-1	0	0	0	0	0	0.24	0	0	0	36.99	40.87	33.02
TRINITY_DN11850_c0_g1	IsZF-HD-2	1.19	1.58	1.59	0.13	0	0	4.64	5.46	6.55	0.67	0.89	0.35
TRINITY_DN12255_c1_g1	IsZF-HD-3	0.46	0.27	0.48	14	11.91	9.89	14.73	16.11	14	14.69	14.65	13.85
TRINITY_DN20898_c0_g1	IsZF-HD-4	11.4	7.81	7.77	2.04	2.09	1.9	1.64	1.62	1.86	1.23	1.64	1.43
TRINITY_DN30392_c0_g1	IsZF-HD-5	7.92	6.85	8.27	0.03	0	0	0	0.03	0	0	0.03	0.03
TRINITY_DN3510_c0_g3	IsZF-HD-6	6.6	5.69	5.7	2.74	2.39	2	2.31	2.43	2.58	7.18	7.84	7.54
TRINITY_DN50507_c0_g1	IsZF-HD-7	1.44	1.36	1.82	0.08	0.14	0	0.08	0.27	0	0.24	0.27	0.32
TRINITY_DN7194_c0_g1	IsZF-HD-8	2.33	2.23	2.61	2.95	3.43	3.47	2.21	2.49	2.5	3.89	3.21	3.78
TRINITY_DN75947_c0_g1	IsZF-HD-9	0.65	0.64	3.71	0	0	0	0	0	0	0	0	0
TRINITY_DN87944_c0_g1	IsZF-HD-10	1.49	0.8	0.99	0.19	0.35	0.06	0	0	0.11	0.63	0.06	0.45
TRINITY_DN89894_c0_g1	IsZF-HD-11	5.17	5.48	4.18	0.74	0.62	0.51	1.3	1.45	1.24	3.11	3.67	4.53
