# Supplementary material for: Transcriptional Regulation of Proanthocyanidin Biosynthesis Pathway Genes and Transcription factors in Indigofera stachyodes Lindl. Roots.
Source: Research Square preprint supplement (doi:10.21203/rs.3.rs-1419639/v1), 2022-03-31
Supplement: Supplementary file 4 [file f4883f0b38b61b0864cd7e0a.xlsx]

## Sheet: Sheet1
Table S The GO categorization of downregulated-DEGs
Group	Number	GO ID	Term Type	Description	Ratio_in_study	Pvalue_corrected
leaf vs stem	55	GO:0009809	BP	lignin biosynthetic process	55/14968	0.000354898
leaf vs stem	23	GO:0010336	BP	gibberellic acid homeostasis	23/14968	0.000354898
leaf vs stem	50	GO:0009695	BP	jasmonic acid biosynthetic process	50/14968	0.000354898
leaf vs stem	96	GO:0044550	BP	secondary metabolite biosynthetic process	96/14968	0.000354898
leaf vs stem	72	GO:0009699	BP	phenylpropanoid biosynthetic process	72/14968	0.000354898
leaf vs stem	53	GO:0009694	BP	jasmonic acid metabolic process	53/14968	0.000354898
leaf vs stem	48	GO:0031408	BP	oxylipin biosynthetic process	48/14968	0.000354898
leaf vs stem	48	GO:0031407	BP	oxylipin metabolic process	48/14968	0.000354898
leaf vs stem	153	GO:0006414	BP	translational elongation	153/14968	0.000354898
leaf vs stem	200	GO:0022613	BP	ribonucleoprotein complex biogenesis	200/14968	0.000354898
leaf vs stem	152	GO:0002181	BP	cytoplasmic translation	152/14968	0.000354898
leaf vs stem	152	GO:0006633	BP	fatty acid biosynthetic process	152/14968	0.000354898
leaf vs stem	103	GO:0042026	BP	protein refolding	103/14968	0.000354898
leaf vs stem	67	GO:0042273	BP	ribosomal large subunit biogenesis	67/14968	0.000354898
leaf vs stem	194	GO:0072330	BP	monocarboxylic acid biosynthetic process	194/14968	0.000354898
leaf vs stem	137	GO:0000027	BP	ribosomal large subunit assembly	137/14968	0.000354898
leaf vs stem	218	GO:0006099	BP	tricarboxylic acid cycle	218/14968	0.000354898
leaf vs stem	112	GO:0072329	BP	monocarboxylic acid catabolic process	112/14968	0.000354898
leaf vs stem	211	GO:0006631	BP	fatty acid metabolic process	211/14968	0.000354898
leaf vs stem	263	GO:0019725	BP	cellular homeostasis	263/14968	0.000354898
leaf vs stem	194	GO:0045454	BP	cell redox homeostasis	194/14968	0.000354898
leaf vs stem	124	GO:0042254	BP	ribosome biogenesis	124/14968	0.000354898
leaf vs stem	239	GO:1902600	BP	proton transmembrane transport	239/14968	0.000354898
leaf vs stem	386	GO:0071826	BP	ribonucleoprotein complex subunit organization	386/14968	0.000354898
leaf vs stem	244	GO:0016999	BP	antibiotic metabolic process	244/14968	0.000354898
leaf vs stem	168	GO:0017001	BP	antibiotic catabolic process	168/14968	0.000354898
leaf vs stem	354	GO:0042592	BP	homeostatic process	354/14968	0.000354898
leaf vs stem	493	GO:0034622	BP	cellular protein-containing complex assembly	493/14968	0.000354898
leaf vs stem	562	GO:0065008	BP	regulation of biological quality	562/14968	0.000354898
leaf vs stem	242	GO:0006979	BP	response to oxidative stress	242/14968	0.000354898
leaf vs stem	102	GO:0001732	BP	formation of cytoplasmic translation initiation complex	102/14968	0.000354898
leaf vs stem	386	GO:0022618	BP	ribonucleoprotein complex assembly	386/14968	0.000354898
leaf vs stem	465	GO:0055114	BP	oxidation-reduction process	465/14968	0.000354898
leaf vs stem	566	GO:0017144	BP	drug metabolic process	566/14968	0.000354898
leaf vs stem	514	GO:0065003	BP	protein-containing complex assembly	514/14968	0.000354898
leaf vs stem	97	GO:0000028	BP	ribosomal small subunit assembly	97/14968	0.000354898
leaf vs stem	235	GO:0044085	BP	cellular component biogenesis	235/14968	0.000354898
leaf vs stem	435	GO:0051186	BP	cofactor metabolic process	435/14968	0.000354898
leaf vs stem	532	GO:0032787	BP	monocarboxylic acid metabolic process	532/14968	0.000354898
leaf vs stem	551	GO:0043933	BP	protein-containing complex subunit organization	551/14968	0.000354898
leaf vs stem	67	GO:0031970	CC	organelle envelope lumen	67/14968	0.000354898
leaf vs stem	66	GO:0005758	CC	mitochondrial intermembrane space	66/14968	0.000354898
leaf vs stem	62	GO:0009514	CC	glyoxysome	62/14968	0.000354898
leaf vs stem	130	GO:0042788	CC	polysomal ribosome	130/14968	0.000354898
leaf vs stem	177	GO:0005743	CC	mitochondrial inner membrane	177/14968	0.000354898
leaf vs stem	194	GO:0005777	CC	peroxisome	194/14968	0.000354898
leaf vs stem	193	GO:0031974	CC	membrane-enclosed lumen	193/14968	0.000354898
leaf vs stem	193	GO:0070013	CC	intracellular organelle lumen	193/14968	0.000354898
leaf vs stem	193	GO:0043233	CC	organelle lumen	193/14968	0.000354898
leaf vs stem	143	GO:0022626	CC	cytosolic ribosome	143/14968	0.000354898
leaf vs stem	202	GO:0042579	CC	microbody	202/14968	0.000354898
leaf vs stem	217	GO:0031966	CC	mitochondrial membrane	217/14968	0.000354898
leaf vs stem	287	GO:0005730	CC	nucleolus	287/14968	0.000354898
leaf vs stem	250	GO:0005774	CC	vacuolar membrane	250/14968	0.000354898
leaf vs stem	404	GO:0022627	CC	cytosolic small ribosomal subunit	404/14968	0.000354898
leaf vs stem	499	GO:0044429	CC	mitochondrial part	499/14968	0.000354898
leaf vs stem	662	GO:0015934	CC	large ribosomal subunit	662/14968	0.000354898
leaf vs stem	550	GO:0015935	CC	small ribosomal subunit	550/14968	0.000354898
leaf vs stem	551	GO:0022625	CC	cytosolic large ribosomal subunit	551/14968	0.000354898
leaf vs stem	186	GO:0019866	CC	organelle inner membrane	186/14968	0.000354898
leaf vs stem	49	GO:0052747	MF	sinapyl alcohol dehydrogenase activity	49/14968	0.000354898
leaf vs stem	42	GO:0016629	MF	12-oxophytodienoate reductase activity	42/14968	0.000354898
leaf vs stem	43	GO:0102132	MF	3-oxo-pimeloyl-[acp] methyl ester reductase activity	43/14968	0.000354898
leaf vs stem	43	GO:0102131	MF	3-oxo-glutaryl-[acp] methyl ester reductase activity	43/14968	0.000354898
leaf vs stem	67	GO:0004312	MF	fatty acid synthase activity	67/14968	0.000354898
leaf vs stem	41	GO:0004022	MF	alcohol dehydrogenase (NAD) activity	41/14968	0.000354898
leaf vs stem	72	GO:0045551	MF	cinnamyl-alcohol dehydrogenase activity	72/14968	0.000354898
leaf vs stem	59	GO:0004316	MF	3-oxoacyl-[acyl-carrier-protein] reductase (NADPH) activity	59/14968	0.000354898
leaf vs stem	38	GO:0003959	MF	NADPH dehydrogenase activity	38/14968	0.000354898
leaf vs stem	38	GO:0018548	MF	pentaerythritol trinitrate reductase activity	38/14968	0.000354898
leaf vs stem	38	GO:0052690	MF	trichloro-p-hydroquinone reductive dehalogenase activity	38/14968	0.000354898
leaf vs stem	72	GO:0051537	MF	2 iron, 2 sulfur cluster binding	72/14968	0.000354898
leaf vs stem	142	GO:0010181	MF	FMN binding	142/14968	0.000354898
leaf vs stem	63	GO:0016717	MF	oxidoreductase activity, acting on paired donors, with oxidation of a pair of donors resulting in the reduction of molecular oxygen to two molecules of water	63/14968	0.000354898
leaf vs stem	29	GO:0004150	MF	dihydroneopterin aldolase activity	29/14968	0.000354898
leaf vs stem	57	GO:0016832	MF	aldehyde-lyase activity	57/14968	0.000354898
leaf vs stem	49	GO:0016661	MF	oxidoreductase activity, acting on other nitrogenous compounds as donors	49/14968	0.000354898
leaf vs stem	180	GO:0050661	MF	NADP binding	180/14968	0.000354898
leaf vs stem	206	GO:0016667	MF	oxidoreductase activity, acting on a sulfur group of donors	206/14968	0.000354898
leaf vs stem	214	GO:0016830	MF	carbon-carbon lyase activity	214/14968	0.000354898
leaf vs stem	237	GO:0009055	MF	electron transfer activity	237/14968	0.000354898
leaf vs stem	258	GO:0003746	MF	translation elongation factor activity	258/14968	0.000354898
leaf vs stem	233	GO:0016651	MF	oxidoreductase activity, acting on NAD(P)H	233/14968	0.000354898
leaf vs stem	202	GO:0016627	MF	oxidoreductase activity, acting on the CH-CH group of donors	202/14968	0.000354898
leaf vs stem	285	GO:0019843	MF	rRNA binding	285/14968	0.000354898
leaf vs stem	258	GO:0051287	MF	NAD binding	258/14968	0.000354898
leaf vs stem	533	GO:0016616	MF	oxidoreductase activity, acting on the CH-OH group of donors, NAD or NADP as acceptor	533/14968	0.000354898
leaf vs stem	83	GO:0016744	MF	transferase activity, transferring aldehyde or ketonic groups	83/14968	0.000354898
leaf vs stem	13	GO:0047681	MF	aryl-alcohol dehydrogenase (NADP+) activity	13/14968	0.000354898
leaf vs stem	13	GO:0008812	MF	choline dehydrogenase activity	13/14968	0.000354898
leaf vs stem	385	GO:0020037	MF	heme binding	385/14968	0.000354898
leaf vs stem	502	GO:0008135	MF	translation factor activity, RNA binding	502/14968	0.000354898
leaf vs stem	434	GO:0046906	MF	tetrapyrrole binding	434/14968	0.000354898
leaf vs stem	503	GO:0090079	MF	translation regulator activity, nucleic acid binding	503/14968	0.000354898
leaf vs stem	503	GO:0045182	MF	translation regulator activity	503/14968	0.000354898
leaf vs stem	580	GO:0016614	MF	oxidoreductase activity, acting on CH-OH group of donors	580/14968	0.000354898
leaf vs stem	316	GO:0016903	MF	oxidoreductase activity, acting on the aldehyde or oxo group of donors	316/14968	0.000361459
leaf vs stem	218	GO:0019829	MF	ATPase-coupled cation transmembrane transporter activity	218/14968	0.000361459
leaf vs stem	569	GO:0006629	BP	lipid metabolic process	569/14968	0.000365734
leaf vs stem	883	GO:0050662	MF	coenzyme binding	883/14968	0.000369575
leaf vs stem	251	GO:0015672	BP	monovalent inorganic cation transport	251/14968	0.000370966
leaf vs stem	41	GO:0004801	MF	sedoheptulose-7-phosphate:D-glyceraldehyde-3-phosphate glyceronetransferase activity	41/14968	0.000385968
leaf vs stem	1040	GO:0044445	CC	cytosolic part	1040/14968	0.00038645
leaf vs stem	266	GO:0003743	MF	translation initiation factor activity	266/14968	0.000389927
leaf vs stem	197	GO:0046686	BP	response to cadmium ion	197/14968	0.000392266
leaf vs stem	1212	GO:0044391	CC	ribosomal subunit	1212/14968	0.000406128
leaf vs stem	105	GO:0005759	CC	mitochondrial matrix	105/14968	0.000406128
leaf vs stem	582	GO:0022607	BP	cellular component assembly	582/14968	0.000407605
leaf vs stem	222	GO:0042625	MF	ATPase-coupled ion transmembrane transporter activity	222/14968	0.000407605
leaf vs stem	91	GO:0016628	MF	oxidoreductase activity, acting on the CH-CH group of donors, NAD or NADP as acceptor	91/14968	0.000416785
leaf vs stem	259	GO:0098655	BP	cation transmembrane transport	259/14968	0.000417145
leaf vs stem	1152	GO:0043436	BP	oxoacid metabolic process	1152/14968	0.00042113
leaf vs stem	1121	GO:0019752	BP	carboxylic acid metabolic process	1121/14968	0.000425859
leaf vs stem	1157	GO:0006082	BP	organic acid metabolic process	1157/14968	0.000425859
leaf vs stem	442	GO:0006811	BP	ion transport	442/14968	0.000425859
leaf vs stem	1505	GO:0048037	MF	cofactor binding	1505/14968	0.000425859
leaf vs stem	264	GO:0098660	BP	inorganic ion transmembrane transport	264/14968	0.000430161
leaf vs stem	284	GO:0016620	MF	oxidoreductase activity, acting on the aldehyde or oxo group of donors, NAD or NADP as acceptor	284/14968	0.000437724
leaf vs stem	2107	GO:0003735	MF	structural constituent of ribosome	2107/14968	0.000442152
leaf vs stem	2082	GO:0043604	BP	amide biosynthetic process	2082/14968	0.000443947
leaf vs stem	1964	GO:0005840	CC	ribosome	1964/14968	0.000443947
leaf vs stem	2010	GO:0043043	BP	peptide biosynthetic process	2010/14968	0.000447487
leaf vs stem	2188	GO:0043603	BP	cellular amide metabolic process	2188/14968	0.00044791
leaf vs stem	1690	GO:0003723	MF	RNA binding	1690/14968	0.00044791
leaf vs stem	1728	GO:0044281	BP	small molecule metabolic process	1728/14968	0.000451943
leaf vs stem	2035	GO:0006518	BP	peptide metabolic process	2035/14968	0.000451943
leaf vs stem	2237	GO:0043228	CC	non-membrane-bounded organelle	2237/14968	0.000451943
leaf vs stem	2237	GO:0043232	CC	intracellular non-membrane-bounded organelle	2237/14968	0.000451943
leaf vs stem	222	GO:0050660	MF	flavin adenine dinucleotide binding	222/14968	0.000451943
leaf vs stem	2007	GO:0006412	BP	translation	2007/14968	0.000454122
leaf vs stem	254	GO:0098662	BP	inorganic cation transmembrane transport	254/14968	0.000457302
leaf vs stem	2248	GO:0034645	BP	cellular macromolecule biosynthetic process	2248/14968	0.000457302
leaf vs stem	2301	GO:0009059	BP	macromolecule biosynthetic process	2301/14968	0.000457302
leaf vs stem	182	GO:0016054	BP	organic acid catabolic process	182/14968	0.000457302
leaf vs stem	182	GO:0046395	BP	carboxylic acid catabolic process	182/14968	0.000457302
leaf vs stem	2150	GO:0005198	MF	structural molecule activity	2150/14968	0.000457302
leaf vs stem	2560	GO:0044271	BP	cellular nitrogen compound biosynthetic process	2560/14968	0.000465801
leaf vs stem	13489	GO:0003674	MF	molecular_function	13489/14968	0.000465801
leaf vs stem	2553	GO:1990904	CC	ribonucleoprotein complex	2553/14968	0.00046732
leaf vs stem	113	GO:0015036	MF	disulfide oxidoreductase activity	113/14968	0.00046732
leaf vs stem	403	GO:0006091	BP	generation of precursor metabolites and energy	403/14968	0.0004694
leaf vs stem	607	GO:0044283	BP	small molecule biosynthetic process	607/14968	0.0004694
leaf vs stem	2607	GO:0016491	MF	oxidoreductase activity	2607/14968	0.0004694
leaf vs stem	2466	GO:0044267	BP	cellular protein metabolic process	2466/14968	0.000478828
leaf vs stem	2661	GO:1901566	BP	organonitrogen compound biosynthetic process	2661/14968	0.000480623
leaf vs stem	2668	GO:0019538	BP	protein metabolic process	2668/14968	0.000495999
leaf vs stem	3442	GO:0044249	BP	cellular biosynthetic process	3442/14968	0.000503101
leaf vs stem	3495	GO:1901576	BP	organic substance biosynthetic process	3495/14968	0.000525215
leaf vs stem	3750	GO:1901564	BP	organonitrogen compound metabolic process	3750/14968	0.000525215
leaf vs stem	293	GO:0034220	BP	ion transmembrane transport	293/14968	0.000525215
leaf vs stem	3572	GO:0032991	CC	protein-containing complex	3572/14968	0.000525215
leaf vs stem	3644	GO:0009058	BP	biosynthetic process	3644/14968	0.000530221
leaf vs stem	71	GO:0004096	MF	catalase activity	71/14968	0.000530221
leaf vs stem	255	GO:0044437	CC	vacuolar part	255/14968	0.000543464
leaf vs stem	237	GO:0003729	MF	mRNA binding	237/14968	0.000550215
leaf vs stem	5249	GO:0044444	CC	cytoplasmic part	5249/14968	0.00057422
leaf vs stem	3520	GO:0034641	BP	cellular nitrogen compound metabolic process	3520/14968	0.000575938
leaf vs stem	4689	GO:0043229	CC	intracellular organelle	4689/14968	0.000576756
leaf vs stem	4691	GO:0043226	CC	organelle	4691/14968	0.000576977
leaf vs stem	5918	GO:0044237	BP	cellular metabolic process	5918/14968	0.000600034
leaf vs stem	147	GO:0072593	BP	reactive oxygen species metabolic process	147/14968	0.000618776
leaf vs stem	7263	GO:0044424	CC	intracellular part	7263/14968	0.000618776
leaf vs stem	6736	GO:0008152	BP	metabolic process	6736/14968	0.000623925
leaf vs stem	6086	GO:0071704	BP	organic substance metabolic process	6086/14968	0.000625232
leaf vs stem	223	GO:0016209	MF	antioxidant activity	223/14968	0.000640195
leaf vs stem	7816	GO:0044464	CC	cell part	7816/14968	0.000641205
leaf vs stem	108	GO:0046933	MF	proton-transporting ATP synthase activity, rotational mechanism	108/14968	0.000643655
leaf vs stem	16	GO:0046029	MF	mannitol dehydrogenase activity	16/14968	0.000653534
leaf vs stem	16	GO:0031320	MF	hexitol dehydrogenase activity	16/14968	0.000653534
leaf vs stem	351	GO:0009150	BP	purine ribonucleotide metabolic process	351/14968	0.00068884
leaf vs stem	357	GO:0006163	BP	purine nucleotide metabolic process	357/14968	0.000710793
leaf vs stem	226	GO:0009152	BP	purine ribonucleotide biosynthetic process	226/14968	0.000723428
leaf vs stem	132	GO:0044769	MF	ATPase activity, coupled to transmembrane movement of ions, rotational mechanism	132/14968	0.00073906
leaf vs stem	366	GO:0009259	BP	ribonucleotide metabolic process	366/14968	0.000745508
leaf vs stem	52	GO:0004029	MF	aldehyde dehydrogenase (NAD) activity	52/14968	0.000746622
leaf vs stem	218	GO:0010038	BP	response to metal ion	218/14968	0.000754693
leaf vs stem	242	GO:0009260	BP	ribonucleotide biosynthetic process	242/14968	0.000779053
leaf vs stem	448	GO:0016829	MF	lyase activity	448/14968	0.000799236
leaf vs stem	298	GO:0009506	CC	plasmodesma	298/14968	0.000827192
leaf vs stem	298	GO:0005911	CC	cell-cell junction	298/14968	0.000827192
leaf vs stem	298	GO:0030054	CC	cell junction	298/14968	0.000831383
leaf vs stem	249	GO:0072522	BP	purine-containing compound biosynthetic process	249/14968	0.000856092
leaf vs stem	326	GO:0015078	MF	proton transmembrane transporter activity	326/14968	0.000859899
leaf vs stem	380	GO:0072521	BP	purine-containing compound metabolic process	380/14968	0.000906276
leaf vs stem	93	GO:0005852	CC	eukaryotic translation initiation factor 3 complex	93/14968	0.000906663
leaf vs stem	7469	GO:0009987	BP	cellular process	7469/14968	0.00094872
leaf vs stem	229	GO:0006164	BP	purine nucleotide biosynthetic process	229/14968	0.000960483
leaf vs stem	132	GO:0043021	MF	ribonucleoprotein complex binding	132/14968	0.000960483
leaf vs stem	367	GO:0019693	BP	ribose phosphate metabolic process	367/14968	0.00102016
leaf vs stem	14	GO:0019285	BP	glycine betaine biosynthetic process from choline	14/14968	0.0010567
leaf vs stem	14	GO:0006578	BP	amino-acid betaine biosynthetic process	14/14968	0.0010567
leaf vs stem	14	GO:0019695	BP	choline metabolic process	14/14968	0.0010567
leaf vs stem	14	GO:0031455	BP	glycine betaine metabolic process	14/14968	0.0010567
leaf vs stem	14	GO:0031456	BP	glycine betaine biosynthetic process	14/14968	0.0010567
leaf vs stem	14	GO:0006577	BP	amino-acid betaine metabolic process	14/14968	0.0010567
leaf vs stem	92	GO:0016282	CC	eukaryotic 43S preinitiation complex	92/14968	0.00106647
leaf vs stem	426	GO:0001883	MF	purine nucleoside binding	426/14968	0.00106647
leaf vs stem	426	GO:0005525	MF	GTP binding	426/14968	0.00106647
leaf vs stem	426	GO:0032561	MF	guanyl ribonucleotide binding	426/14968	0.00106647
leaf vs stem	426	GO:0019001	MF	guanyl nucleotide binding	426/14968	0.00106647
leaf vs stem	426	GO:0032550	MF	purine ribonucleoside binding	426/14968	0.00106647
leaf vs stem	101	GO:0043022	MF	ribosome binding	101/14968	0.00109829
leaf vs stem	434	GO:0016053	BP	organic acid biosynthetic process	434/14968	0.00110087
leaf vs stem	434	GO:0046394	BP	carboxylic acid biosynthetic process	434/14968	0.00110087
leaf vs stem	243	GO:0046390	BP	ribose phosphate biosynthetic process	243/14968	0.00111773
leaf vs stem	82	GO:0009698	BP	phenylpropanoid metabolic process	82/14968	0.0011882
leaf vs stem	36	GO:0016018	MF	cyclosporin A binding	36/14968	0.0011882
leaf vs stem	63	GO:0009808	BP	lignin metabolic process	63/14968	0.00119773
leaf vs stem	235	GO:0044282	BP	small molecule catabolic process	235/14968	0.00120327
leaf vs stem	331	GO:0006812	BP	cation transport	331/14968	0.00127913
leaf vs stem	94	GO:0015035	MF	protein disulfide oxidoreductase activity	94/14968	0.00132808
leaf vs stem	325	GO:0010035	BP	response to inorganic substance	325/14968	0.00147769
leaf vs stem	228	GO:0044436	CC	thylakoid part	228/14968	0.00159326
leaf vs stem	102	GO:0006098	BP	pentose-phosphate shunt	102/14968	0.00161422
leaf vs stem	313	GO:0008610	BP	lipid biosynthetic process	313/14968	0.0017129
leaf vs stem	474	GO:0044435	CC	plastid part	474/14968	0.00180585
leaf vs stem	347	GO:0003924	MF	GTPase activity	347/14968	0.00192894
leaf vs stem	245	GO:0046034	BP	ATP metabolic process	245/14968	0.00208804
leaf vs stem	469	GO:0044434	CC	chloroplast part	469/14968	0.00208804
leaf vs stem	41	GO:0004451	MF	isocitrate lyase activity	41/14968	0.00208804
leaf vs stem	126	GO:0015985	BP	energy coupled proton transport, down electrochemical gradient	126/14968	0.00219491
leaf vs stem	126	GO:0015986	BP	ATP synthesis coupled proton transport	126/14968	0.00219491
leaf vs stem	145	GO:0048878	BP	chemical homeostasis	145/14968	0.00226721
leaf vs stem	126	GO:0006754	BP	ATP biosynthetic process	126/14968	0.00227304
leaf vs stem	214	GO:0006732	BP	coenzyme metabolic process	214/14968	0.00227644
leaf vs stem	39	GO:0055088	BP	lipid homeostasis	39/14968	0.00229109
leaf vs stem	103	GO:0006740	BP	NADPH regeneration	103/14968	0.00232348
leaf vs stem	106	GO:0050801	BP	ion homeostasis	106/14968	0.00243684
leaf vs stem	250	GO:0051082	MF	unfolded protein binding	250/14968	0.00245378
leaf vs stem	68	GO:0042133	BP	neurotransmitter metabolic process	68/14968	0.00245594
leaf vs stem	68	GO:0001505	BP	regulation of neurotransmitter levels	68/14968	0.00245594
leaf vs stem	113	GO:0033178	CC	proton-transporting two-sector ATPase complex, catalytic domain	113/14968	0.00246264
leaf vs stem	167	GO:0016684	MF	oxidoreductase activity, acting on peroxide as acceptor	167/14968	0.0025021
leaf vs stem	24	GO:0055081	BP	anion homeostasis	24/14968	0.00271788
leaf vs stem	92	GO:0033290	CC	eukaryotic 48S preinitiation complex	92/14968	0.00287637
leaf vs stem	92	GO:0070993	CC	translation preinitiation complex	92/14968	0.00287637
leaf vs stem	484	GO:0055086	BP	nucleobase-containing small molecule metabolic process	484/14968	0.00293478
leaf vs stem	588	GO:0015318	MF	inorganic molecular entity transmembrane transporter activity	588/14968	0.00298667
leaf vs stem	150	GO:0009142	BP	nucleoside triphosphate biosynthetic process	150/14968	0.00300441
leaf vs stem	349	GO:0015077	MF	monovalent inorganic cation transmembrane transporter activity	349/14968	0.0030075
leaf vs stem	147	GO:0009199	BP	ribonucleoside triphosphate metabolic process	147/14968	0.00314592
leaf vs stem	147	GO:0009201	BP	ribonucleoside triphosphate biosynthetic process	147/14968	0.00314592
leaf vs stem	204	GO:0004497	MF	monooxygenase activity	204/14968	0.00326805
leaf vs stem	427	GO:0032549	MF	ribonucleoside binding	427/14968	0.00329147
leaf vs stem	427	GO:0001882	MF	nucleoside binding	427/14968	0.00331797
leaf vs stem	603	GO:0015075	MF	ion transmembrane transporter activity	603/14968	0.00358027
leaf vs stem	137	GO:0009145	BP	purine nucleoside triphosphate biosynthetic process	137/14968	0.003675
leaf vs stem	137	GO:0009206	BP	purine ribonucleoside triphosphate biosynthetic process	137/14968	0.003675
leaf vs stem	137	GO:0009205	BP	purine ribonucleoside triphosphate metabolic process	137/14968	0.003675
leaf vs stem	65	GO:0042446	BP	hormone biosynthetic process	65/14968	0.00371008
leaf vs stem	11	GO:0048443	BP	stamen development	11/14968	0.00374283
leaf vs stem	1021	GO:0022857	MF	transmembrane transporter activity	1021/14968	0.00377114
leaf vs stem	17	GO:2000022	BP	regulation of jasmonic acid mediated signaling pathway	17/14968	0.0043729
leaf vs stem	90	GO:0045261	CC	proton-transporting ATP synthase complex, catalytic core F(1)	90/14968	0.0043729
leaf vs stem	402	GO:0009117	BP	nucleotide metabolic process	402/14968	0.0043767
leaf vs stem	111	GO:0006739	BP	NADP metabolic process	111/14968	0.00459648
leaf vs stem	138	GO:0009144	BP	purine nucleoside triphosphate metabolic process	138/14968	0.00478742
leaf vs stem	9377	GO:0008150	BP	biological_process	9377/14968	0.00478742
leaf vs stem	585	GO:0005739	CC	mitochondrion	585/14968	0.00522413
leaf vs stem	614	GO:1901135	BP	carbohydrate derivative metabolic process	614/14968	0.00540502
leaf vs stem	106	GO:0051156	BP	glucose 6-phosphate metabolic process	106/14968	0.00570016
leaf vs stem	87	GO:0000470	BP	maturation of LSU-rRNA	87/14968	0.00609329
leaf vs stem	184	GO:0051540	MF	metal cluster binding	184/14968	0.00665789
leaf vs stem	184	GO:0051536	MF	iron-sulfur cluster binding	184/14968	0.00665789
leaf vs stem	64	GO:0140115	BP	export across plasma membrane	64/14968	0.00700043
leaf vs stem	64	GO:0120029	BP	proton export across plasma membrane	64/14968	0.00700043
leaf vs stem	39	GO:0004612	MF	phosphoenolpyruvate carboxykinase (ATP) activity	39/14968	0.00707738
leaf vs stem	7	GO:0044572	BP	[4Fe-4S] cluster assembly	7/14968	0.0074489
leaf vs stem	193	GO:0006970	BP	response to osmotic stress	193/14968	0.00773987
leaf vs stem	89	GO:0016655	MF	oxidoreductase activity, acting on NAD(P)H, quinone or similar compound as acceptor	89/14968	0.00781232
leaf vs stem	16	GO:0008802	MF	betaine-aldehyde dehydrogenase activity	16/14968	0.00806568
leaf vs stem	71	GO:0070469	CC	respirasome	71/14968	0.00809675
leaf vs stem	29	GO:0009654	CC	photosystem II oxygen evolving complex	29/14968	0.00870233
leaf vs stem	268	GO:1901293	BP	nucleoside phosphate biosynthetic process	268/14968	0.00871815
leaf vs stem	133	GO:0006006	BP	glucose metabolic process	133/14968	0.00900731
leaf vs stem	403	GO:0006753	BP	nucleoside phosphate metabolic process	403/14968	0.00909933
leaf vs stem	265	GO:0009165	BP	nucleotide biosynthetic process	265/14968	0.00935006
leaf vs stem	126	GO:0051187	BP	cofactor catabolic process	126/14968	0.00958795
leaf vs stem	53	GO:0070180	MF	large ribosomal subunit rRNA binding	53/14968	0.0096966
leaf vs stem	152	GO:0005507	MF	copper ion binding	152/14968	0.00974417
leaf vs stem	18	GO:0003938	MF	IMP dehydrogenase activity	18/14968	0.0101885
leaf vs stem	11	GO:0048437	BP	floral organ development	11/14968	0.010425
leaf vs stem	129	GO:0019748	BP	secondary metabolic process	129/14968	0.0114219
leaf vs stem	21	GO:0009450	BP	gamma-aminobutyric acid catabolic process	21/14968	0.0119366
leaf vs stem	72	GO:0072350	BP	tricarboxylic acid metabolic process	72/14968	0.0122991
leaf vs stem	186	GO:0042737	BP	drug catabolic process	186/14968	0.0123946
leaf vs stem	5544	GO:0044238	BP	primary metabolic process	5544/14968	0.0128084
leaf vs stem	203	GO:0051188	BP	cofactor biosynthetic process	203/14968	0.0129608
leaf vs stem	1057	GO:0005215	MF	transporter activity	1057/14968	0.0131773
leaf vs stem	1264	GO:0050896	BP	response to stimulus	1264/14968	0.0138924
leaf vs stem	83	GO:0042445	BP	hormone metabolic process	83/14968	0.013907
leaf vs stem	18	GO:0004070	MF	aspartate carbamoyltransferase activity	18/14968	0.013907
leaf vs stem	20	GO:0016743	MF	carboxyl- or carbamoyltransferase activity	20/14968	0.0147544
leaf vs stem	114	GO:0042744	BP	hydrogen peroxide catabolic process	114/14968	0.015286
leaf vs stem	448	GO:0055085	BP	transmembrane transport	448/14968	0.0153808
leaf vs stem	36	GO:1902652	BP	secondary alcohol metabolic process	36/14968	0.0181914
leaf vs stem	46	GO:0008097	MF	5S rRNA binding	46/14968	0.01869
leaf vs stem	73	GO:0035383	BP	thioester metabolic process	73/14968	0.0189636
leaf vs stem	73	GO:0006637	BP	acyl-CoA metabolic process	73/14968	0.0189636
leaf vs stem	304	GO:0006457	BP	protein folding	304/14968	0.019094
leaf vs stem	9	GO:0033542	BP	fatty acid beta-oxidation, unsaturated, even number	9/14968	0.019094
leaf vs stem	9	GO:0080023	MF	3R-hydroxyacyl-CoA dehydratase activity	9/14968	0.019094
leaf vs stem	6	GO:0080110	BP	sporopollenin biosynthetic process	6/14968	0.0191623
leaf vs stem	6	GO:0047746	MF	chlorophyllase activity	6/14968	0.0191623
leaf vs stem	39	GO:0015942	BP	formate metabolic process	39/14968	0.0192383
leaf vs stem	39	GO:0008863	MF	formate dehydrogenase (NAD+) activity	39/14968	0.0192383
leaf vs stem	30	GO:0006102	BP	isocitrate metabolic process	30/14968	0.0193137
leaf vs stem	115	GO:0042743	BP	hydrogen peroxide metabolic process	115/14968	0.0210119
leaf vs stem	152	GO:0009141	BP	nucleoside triphosphate metabolic process	152/14968	0.0211114
leaf vs stem	59	GO:0016668	MF	oxidoreductase activity, acting on a sulfur group of donors, NAD(P) as acceptor	59/14968	0.0229251
leaf vs stem	159	GO:1901615	BP	organic hydroxy compound metabolic process	159/14968	0.022974
leaf vs stem	159	GO:0044272	BP	sulfur compound biosynthetic process	159/14968	0.0235375
leaf vs stem	21	GO:0009013	MF	succinate-semialdehyde dehydrogenase [NAD(P)+] activity	21/14968	0.0236378
leaf vs stem	38	GO:0042183	BP	formate catabolic process	38/14968	0.0240595
leaf vs stem	151	GO:0004601	MF	peroxidase activity	151/14968	0.0243832
leaf vs stem	180	GO:0009651	BP	response to salt stress	180/14968	0.0273222
leaf vs stem	41	GO:0004611	MF	phosphoenolpyruvate carboxykinase activity	41/14968	0.0273222
leaf vs stem	21	GO:0009448	BP	gamma-aminobutyric acid metabolic process	21/14968	0.0292531
leaf vs stem	18	GO:0015718	BP	monocarboxylic acid transport	18/14968	0.0300516
leaf vs stem	98	GO:0010817	BP	regulation of hormone levels	98/14968	0.0304655
leaf vs stem	441	GO:0008324	MF	cation transmembrane transporter activity	441/14968	0.0304655
leaf vs stem	616	GO:0019637	BP	organophosphate metabolic process	616/14968	0.030765
leaf vs stem	34	GO:0030515	MF	snoRNA binding	34/14968	0.030849
leaf vs stem	62	GO:0042558	BP	pteridine-containing compound metabolic process	62/14968	0.0308981
leaf vs stem	19	GO:0004777	MF	succinate-semialdehyde dehydrogenase (NAD+) activity	19/14968	0.0314601
leaf vs stem	7	GO:0030371	MF	translation repressor activity	7/14968	0.0321077
leaf vs stem	3138	GO:0044446	CC	intracellular organelle part	3138/14968	0.0332549
leaf vs stem	3141	GO:0044422	CC	organelle part	3141/14968	0.0332549
leaf vs stem	182	GO:0055035	CC	plastid thylakoid membrane	182/14968	0.0334947
leaf vs stem	182	GO:0009535	CC	chloroplast thylakoid membrane	182/14968	0.0334947
leaf vs stem	22	GO:0009052	BP	pentose-phosphate shunt, non-oxidative branch	22/14968	0.0344379
leaf vs stem	30	GO:0051920	MF	peroxiredoxin activity	30/14968	0.0350302
leaf vs stem	77	GO:0006081	BP	cellular aldehyde metabolic process	77/14968	0.0358085
leaf vs stem	48	GO:0000275	CC	mitochondrial proton-transporting ATP synthase complex, catalytic core F(1)	48/14968	0.0361103
leaf vs stem	18	GO:2001057	BP	reactive nitrogen species metabolic process	18/14968	0.0368759
leaf vs stem	18	GO:0042128	BP	nitrate assimilation	18/14968	0.0368759
leaf vs stem	18	GO:0042126	BP	nitrate metabolic process	18/14968	0.0368759
leaf vs stem	298	GO:0098805	CC	whole membrane	298/14968	0.0377395
leaf vs stem	8	GO:0008410	MF	CoA-transferase activity	8/14968	0.0398867
leaf vs stem	22	GO:0004499	MF	N,N-dimethylaniline monooxygenase activity	22/14968	0.0399752
leaf vs stem	234	GO:0016747	MF	transferase activity, transferring acyl groups other than amino-acyl groups	234/14968	0.0410819
leaf vs stem	59	GO:0006760	BP	folic acid-containing compound metabolic process	59/14968	0.0418934
leaf vs stem	283	GO:0006790	BP	sulfur compound metabolic process	283/14968	0.0420282
leaf vs stem	132	GO:1990204	CC	oxidoreductase complex	132/14968	0.042163
leaf vs stem	9	GO:0046189	BP	phenol-containing compound biosynthetic process	9/14968	0.04389
leaf vs stem	44	GO:0016833	MF	oxo-acid-lyase activity	44/14968	0.0444839
leaf vs stem	15	GO:0030497	BP	fatty acid elongation	15/14968	0.0452621
leaf vs stem	13	GO:0048481	BP	plant ovule development	13/14968	0.0452621
leaf vs stem	17	GO:0004088	MF	carbamoyl-phosphate synthase (glutamine-hydrolyzing) activity	17/14968	0.0453157
leaf vs stem	568	GO:0042221	BP	response to chemical	568/14968	0.0453666
leaf vs stem	5	GO:0102293	MF	pheophytinase b activity	5/14968	0.0461857
leaf vs stem	48	GO:0006085	BP	acetyl-CoA biosynthetic process	48/14968	0.0473358
leaf vs stem	48	GO:0016878	MF	acid-thiol ligase activity	48/14968	0.0473358
leaf vs stem	68	GO:0031386	MF	protein tag	68/14968	0.0511905
leaf vs stem	184	GO:0042651	CC	thylakoid membrane	184/14968	0.0523888
leaf vs stem	184	GO:0034357	CC	photosynthetic membrane	184/14968	0.0523888
leaf vs stem	35	GO:0004448	MF	isocitrate dehydrogenase activity	35/14968	0.0523888
leaf vs stem	66	GO:0008553	MF	proton-exporting ATPase activity, phosphorylative mechanism	66/14968	0.0562139
leaf vs stem	485	GO:0009628	BP	response to abiotic stimulus	485/14968	0.056738
leaf vs stem	17	GO:0010207	BP	photosystem II assembly	17/14968	0.0573578
leaf vs stem	21	GO:0071941	BP	nitrogen cycle metabolic process	21/14968	0.0586776
leaf vs stem	8152	GO:0003824	MF	catalytic activity	8152/14968	0.0616621
leaf vs stem	50	GO:0035384	BP	thioester biosynthetic process	50/14968	0.0626168
leaf vs stem	50	GO:0071616	BP	acyl-CoA biosynthetic process	50/14968	0.0626168
leaf vs stem	42	GO:0006635	BP	fatty acid beta-oxidation	42/14968	0.0643363
leaf vs stem	235	GO:0005506	MF	iron ion binding	235/14968	0.0666225
leaf vs stem	410	GO:0022890	MF	inorganic cation transmembrane transporter activity	410/14968	0.0682523
leaf vs stem	42	GO:0009611	BP	response to wounding	42/14968	0.0685371
leaf vs stem	6	GO:0047196	MF	long-chain-alcohol O-fatty-acyltransferase activity	6/14968	0.0692344
leaf vs stem	6	GO:0102311	MF	8-hydroxygeraniol dehydrogenase activity	6/14968	0.0692344
leaf vs stem	55	GO:0006084	BP	acetyl-CoA metabolic process	55/14968	0.0699213
leaf vs stem	29	GO:0009060	BP	aerobic respiration	29/14968	0.0708945
leaf vs stem	40	GO:0006778	BP	porphyrin-containing compound metabolic process	40/14968	0.0735872
leaf vs stem	27	GO:0004033	MF	aldo-keto reductase (NADP) activity	27/14968	0.0737071
leaf vs stem	329	GO:0016746	MF	transferase activity, transferring acyl groups	329/14968	0.0743258
leaf vs stem	34	GO:0016405	MF	CoA-ligase activity	34/14968	0.0763167
leaf vs stem	92	GO:0003755	MF	peptidyl-prolyl cis-trans isomerase activity	92/14968	0.0763167
leaf vs stem	116	GO:0051539	MF	4 iron, 4 sulfur cluster binding	116/14968	0.0781092
leaf vs stem	18	GO:0005853	CC	eukaryotic translation elongation factor 1 complex	18/14968	0.0791544
leaf vs stem	7	GO:0017014	BP	protein nitrosylation	7/14968	0.0796953
leaf vs stem	7	GO:0080142	BP	regulation of salicylic acid biosynthetic process	7/14968	0.0796953
leaf vs stem	7	GO:0033484	BP	nitric oxide homeostasis	7/14968	0.0796953
leaf vs stem	7	GO:0033483	BP	gas homeostasis	7/14968	0.0796953
leaf vs stem	32	GO:0005347	MF	ATP transmembrane transporter activity	32/14968	0.0796953
leaf vs stem	7	GO:0015181	MF	arginine transmembrane transporter activity	7/14968	0.0796953
leaf vs stem	61	GO:0046942	BP	carboxylic acid transport	61/14968	0.0820443
leaf vs stem	61	GO:0015849	BP	organic acid transport	61/14968	0.0820443
leaf vs stem	25	GO:0008106	MF	alcohol dehydrogenase (NADP+) activity	25/14968	0.0820443
leaf vs stem	23	GO:0010200	BP	response to chitin	23/14968	0.0836965
leaf vs stem	8	GO:0010023	BP	proanthocyanidin biosynthetic process	8/14968	0.0836965
leaf vs stem	8	GO:0046885	BP	regulation of hormone biosynthetic process	8/14968	0.0836965
leaf vs stem	8	GO:0036456	MF	L-methionine-(S)-S-oxide reductase activity	8/14968	0.0836965
leaf vs stem	8	GO:0047215	MF	indole-3-acetate beta-glucosyltransferase activity	8/14968	0.0836965
leaf vs stem	8	GO:0033744	MF	L-methionine:thioredoxin-disulfide S-oxidoreductase activity	8/14968	0.0836965
leaf vs stem	11	GO:0009298	BP	GDP-mannose biosynthetic process	11/14968	0.0850188
leaf vs stem	658	GO:1901362	BP	organic cyclic compound biosynthetic process	658/14968	0.0854625
leaf vs stem	13	GO:0016656	MF	monodehydroascorbate reductase (NADH) activity	13/14968	0.0854625
leaf vs stem	13	GO:0034513	MF	box H/ACA snoRNA binding	13/14968	0.0854625
leaf vs stem	934	GO:0006950	BP	response to stress	934/14968	0.0870303
leaf vs stem	19	GO:0006177	BP	GMP biosynthetic process	19/14968	0.0891344
leaf vs stem	19	GO:0047484	BP	regulation of response to osmotic stress	19/14968	0.0891344
leaf vs stem	19	GO:1901000	BP	regulation of response to salt stress	19/14968	0.0891344
leaf vs stem	19	GO:0046037	BP	GMP metabolic process	19/14968	0.0891344
leaf vs stem	42	GO:0009062	BP	fatty acid catabolic process	42/14968	0.0895981
leaf vs stem	42	GO:0019395	BP	fatty acid oxidation	42/14968	0.0895981
leaf vs stem	21	GO:1902074	BP	response to salt	21/14968	0.0910964
leaf vs stem	92	GO:0016859	MF	cis-trans isomerase activity	92/14968	0.091516
leaf vs stem	42	GO:0042594	BP	response to starvation	42/14968	0.0960595
leaf vs stem	102	GO:0016831	MF	carboxy-lyase activity	102/14968	0.0961551
leaf vs stem	17	GO:0008028	MF	monocarboxylic acid transmembrane transporter activity	17/14968	0.0962429
leaf vs stem	10	GO:1901001	BP	negative regulation of response to salt stress	10/14968	0.098271
leaf vs stem	49	GO:0000463	BP	maturation of LSU-rRNA from tricistronic rRNA transcript (SSU-rRNA, 5.8S rRNA, LSU-rRNA)	49/14968	0.0993066
leaf vs stem	46	GO:0016226	BP	iron-sulfur cluster assembly	46/14968	0.0993066
leaf vs stem	46	GO:0006986	BP	response to unfolded protein	46/14968	0.0993066
leaf vs stem	46	GO:0034620	BP	cellular response to unfolded protein	46/14968	0.0993066
leaf vs stem	46	GO:0031163	BP	metallo-sulfur cluster assembly	46/14968	0.0993066
leaf vs stem	147	GO:0009617	BP	response to bacterium	147/14968	0.100131
leaf vs stem	24	GO:0003995	MF	acyl-CoA dehydrogenase activity	24/14968	0.1022
leaf vs stem	29	GO:0005471	MF	ATP:ADP antiporter activity	29/14968	0.102486
leaf vs stem	90	GO:0006066	BP	alcohol metabolic process	90/14968	0.102894
leaf vs stem	40	GO:0006551	BP	leucine metabolic process	40/14968	0.102894
leaf vs stem	15	GO:0004069	MF	L-aspartate:2-oxoglutarate aminotransferase activity	15/14968	0.102894
leaf vs stem	15	GO:0043546	MF	molybdopterin cofactor binding	15/14968	0.102894
leaf vs stem	126	GO:0098800	CC	inner mitochondrial membrane protein complex	126/14968	0.103286
leaf vs stem	57	GO:0031667	BP	response to nutrient levels	57/14968	0.103635
leaf vs stem	21	GO:0004791	MF	thioredoxin-disulfide reductase activity	21/14968	0.103938
leaf vs stem	50	GO:0035966	BP	response to topologically incorrect protein	50/14968	0.1049
leaf vs stem	47	GO:0035967	BP	cellular response to topologically incorrect protein	47/14968	0.105774
leaf vs stem	12	GO:0071540	CC	eukaryotic translation initiation factor 3 complex, eIF3e	12/14968	0.105774
leaf vs stem	4	GO:0045038	BP	protein import into chloroplast thylakoid membrane	4/14968	0.106401
leaf vs stem	4	GO:0051307	BP	meiotic chromosome separation	4/14968	0.106401
leaf vs stem	4	GO:0008825	MF	cyclopropane-fatty-acyl-phospholipid synthase activity	4/14968	0.106401
leaf vs stem	4	GO:0120091	MF	jasmonic acid hydrolase	4/14968	0.106401
leaf vs stem	66	GO:0006730	BP	one-carbon metabolic process	66/14968	0.107698
leaf vs stem	38	GO:0000104	MF	succinate dehydrogenase activity	38/14968	0.10937
leaf vs stem	79	GO:0033865	BP	nucleoside bisphosphate metabolic process	79/14968	0.110611
leaf vs stem	79	GO:0033875	BP	ribonucleoside bisphosphate metabolic process	79/14968	0.110611
leaf vs stem	79	GO:0034032	BP	purine nucleoside bisphosphate metabolic process	79/14968	0.110611
leaf vs stem	9	GO:0048825	BP	cotyledon development	9/14968	0.117708
leaf vs stem	39	GO:0042803	MF	protein homodimerization activity	39/14968	0.120968
leaf vs stem	45	GO:0009119	BP	ribonucleoside metabolic process	45/14968	0.12121
leaf vs stem	30	GO:0015217	MF	ADP transmembrane transporter activity	30/14968	0.123112
leaf vs stem	14	GO:0001731	BP	formation of translation preinitiation complex	14/14968	0.126202
leaf vs stem	82	GO:0055080	BP	cation homeostasis	82/14968	0.12635
leaf vs stem	585	GO:0019438	BP	aromatic compound biosynthetic process	585/14968	0.13142
leaf vs stem	33	GO:1990748	BP	cellular detoxification	33/14968	0.131544
leaf vs stem	47	GO:0034440	BP	lipid oxidation	47/14968	0.13804
leaf vs stem	10	GO:0034663	CC	endoplasmic reticulum chaperone complex	10/14968	0.142237
leaf vs stem	10	GO:0004575	MF	sucrose alpha-glucosidase activity	10/14968	0.142237
leaf vs stem	31	GO:0043891	MF	glyceraldehyde-3-phosphate dehydrogenase (NAD(P)+) (phosphorylating) activity	31/14968	0.142237
leaf vs stem	31	GO:0004365	MF	glyceraldehyde-3-phosphate dehydrogenase (NAD+) (phosphorylating) activity	31/14968	0.142237
leaf vs stem	376	GO:0044255	BP	cellular lipid metabolic process	376/14968	0.142684
leaf vs stem	47	GO:0080044	MF	quercetin 7-O-glucosyltransferase activity	47/14968	0.144297
leaf vs stem	47	GO:0080043	MF	quercetin 3-O-glucosyltransferase activity	47/14968	0.144297
leaf vs stem	5	GO:0015204	MF	urea transmembrane transporter activity	5/14968	0.144394
leaf vs stem	5	GO:0000170	MF	sphingosine hydroxylase activity	5/14968	0.144394
leaf vs stem	5	GO:0000293	MF	ferric-chelate reductase activity	5/14968	0.144394
leaf vs stem	5	GO:0016723	MF	oxidoreductase activity, oxidizing metal ions, NAD or NADP as acceptor	5/14968	0.144394
leaf vs stem	34	GO:0016671	MF	oxidoreductase activity, acting on a sulfur group of donors, disulfide as acceptor	34/14968	0.147368
leaf vs stem	313	GO:0016853	MF	isomerase activity	313/14968	0.148651
leaf vs stem	81	GO:0009735	BP	response to cytokinin	81/14968	0.149517
leaf vs stem	2607	GO:0035639	MF	purine ribonucleoside triphosphate binding	2607/14968	0.150824
leaf vs stem	261	GO:0016705	MF	oxidoreductase activity, acting on paired donors, with incorporation or reduction of molecular oxygen	261/14968	0.151526
leaf vs stem	26	GO:0016408	MF	C-acyltransferase activity	26/14968	0.152565
leaf vs stem	41	GO:0033013	BP	tetrapyrrole metabolic process	41/14968	0.154579
leaf vs stem	7	GO:0072321	BP	chaperone-mediated protein transport	7/14968	0.154579
leaf vs stem	6	GO:0015812	BP	gamma-aminobutyric acid transport	6/14968	0.154579
leaf vs stem	21	GO:0009331	CC	glycerol-3-phosphate dehydrogenase complex	21/14968	0.154579
leaf vs stem	7	GO:0102078	MF	methyl jasmonate methylesterase activity	7/14968	0.154579
leaf vs stem	7	GO:0004623	MF	phospholipase A2 activity	7/14968	0.154579
leaf vs stem	6	GO:0022858	MF	alanine transmembrane transporter activity	6/14968	0.154579
leaf vs stem	6	GO:0015128	MF	gluconate transmembrane transporter activity	6/14968	0.154579
leaf vs stem	6	GO:0015185	MF	gamma-aminobutyric acid transmembrane transporter activity	6/14968	0.154579
leaf vs stem	6	GO:0015180	MF	L-alanine transmembrane transporter activity	6/14968	0.154579
leaf vs stem	6	GO:0010279	MF	indole-3-acetic acid amido synthetase activity	6/14968	0.154579
leaf vs stem	6	GO:0015175	MF	neutral amino acid transmembrane transporter activity	6/14968	0.154579
leaf vs stem	14	GO:0015179	MF	L-amino acid transmembrane transporter activity	14/14968	0.155544
leaf vs stem	87	GO:0009063	BP	cellular amino acid catabolic process	87/14968	0.156321
leaf vs stem	32	GO:0000295	MF	adenine nucleotide transmembrane transporter activity	32/14968	0.156764
leaf vs stem	32	GO:0015216	MF	purine nucleotide transmembrane transporter activity	32/14968	0.156764
leaf vs stem	32	GO:0005346	MF	purine ribonucleotide transmembrane transporter activity	32/14968	0.156764
leaf vs stem	19	GO:0005310	MF	dicarboxylic acid transmembrane transporter activity	19/14968	0.156969
leaf vs stem	9	GO:0006123	BP	mitochondrial electron transport, cytochrome c to oxygen	9/14968	0.159297
leaf vs stem	9	GO:0000454	BP	snoRNA guided rRNA pseudouridine synthesis	9/14968	0.159297
leaf vs stem	9	GO:0010214	BP	seed coat development	9/14968	0.159297
leaf vs stem	9	GO:0004476	MF	mannose-6-phosphate isomerase activity	9/14968	0.159297
leaf vs stem	9	GO:0045485	MF	omega-6 fatty acid desaturase activity	9/14968	0.159297
leaf vs stem	11	GO:0009640	BP	photomorphogenesis	11/14968	0.161902
leaf vs stem	100	GO:0140352	BP	export from cell	100/14968	0.167307
leaf vs stem	15	GO:0019427	BP	acetyl-CoA biosynthetic process from acetate	15/14968	0.171381
leaf vs stem	15	GO:0006083	BP	acetate metabolic process	15/14968	0.171381
leaf vs stem	27	GO:0046916	BP	cellular transition metal ion homeostasis	27/14968	0.171381
leaf vs stem	58	GO:0009991	BP	response to extracellular stimulus	58/14968	0.171836
leaf vs stem	71	GO:0006541	BP	glutamine metabolic process	71/14968	0.174214
leaf vs stem	36	GO:0008177	MF	succinate dehydrogenase (ubiquinone) activity	36/14968	0.175059
leaf vs stem	36	GO:0015215	MF	nucleotide transmembrane transporter activity	36/14968	0.175059
leaf vs stem	17	GO:0016229	MF	steroid dehydrogenase activity	17/14968	0.175364
leaf vs stem	63	GO:0004364	MF	glutathione transferase activity	63/14968	0.176082
leaf vs stem	298	GO:1901137	BP	carbohydrate derivative biosynthetic process	298/14968	0.179117
leaf vs stem	115	GO:0006820	BP	anion transport	115/14968	0.182468
leaf vs stem	44	GO:0046128	BP	purine ribonucleoside metabolic process	44/14968	0.183253
leaf vs stem	82	GO:0098771	BP	inorganic ion homeostasis	82/14968	0.183451
leaf vs stem	13	GO:0019673	BP	GDP-mannose metabolic process	13/14968	0.187149
leaf vs stem	48	GO:0044183	MF	protein folding chaperone	48/14968	0.189057
leaf vs stem	83	GO:0009081	BP	branched-chain amino acid metabolic process	83/14968	0.189604
leaf vs stem	64	GO:0006458	BP	'de novo' protein folding	64/14968	0.189743
leaf vs stem	60	GO:0034605	BP	cellular response to heat	60/14968	0.189751
leaf vs stem	1824	GO:0016020	CC	membrane	1824/14968	0.193879
leaf vs stem	8	GO:0009943	BP	adaxial/abaxial axis specification	8/14968	0.194257
leaf vs stem	8	GO:0006540	BP	glutamate decarboxylation to succinate	8/14968	0.194257
leaf vs stem	8	GO:0010337	BP	regulation of salicylic acid metabolic process	8/14968	0.194257
leaf vs stem	8	GO:0030795	MF	jasmonate O-methyltransferase activity	8/14968	0.194257
leaf vs stem	980	GO:0016462	MF	pyrophosphatase activity	980/14968	0.194516
leaf vs stem	45	GO:0042278	BP	purine nucleoside metabolic process	45/14968	0.19523
leaf vs stem	45	GO:0051787	MF	misfolded protein binding	45/14968	0.19523
leaf vs stem	38	GO:0006334	BP	nucleosome assembly	38/14968	0.19737
leaf vs stem	65	GO:0030003	BP	cellular cation homeostasis	65/14968	0.19737
leaf vs stem	25	GO:0009767	BP	photosynthetic electron transport chain	25/14968	0.19737
leaf vs stem	25	GO:0042135	BP	neurotransmitter catabolic process	25/14968	0.19737
leaf vs stem	65	GO:0046912	MF	transferase activity, transferring acyl groups, acyl groups converted into alkyl on transfer	65/14968	0.19737
leaf vs stem	31	GO:1901068	BP	guanosine-containing compound metabolic process	31/14968	0.197624
leaf vs stem	15	GO:0019430	BP	removal of superoxide radicals	15/14968	0.197624
leaf vs stem	15	GO:0006801	BP	superoxide metabolic process	15/14968	0.197624
leaf vs stem	15	GO:0016208	MF	AMP binding	15/14968	0.197624
leaf vs stem	86	GO:0008514	MF	organic anion transmembrane transporter activity	86/14968	0.20076
leaf vs stem	2501	GO:0043169	MF	cation binding	2501/14968	0.204362
leaf vs stem	26	GO:0043023	MF	ribosomal large subunit binding	26/14968	0.205638
leaf vs stem	940	GO:0017111	MF	nucleoside-triphosphatase activity	940/14968	0.206934
leaf vs stem	39	GO:0006885	BP	regulation of pH	39/14968	0.210102
leaf vs stem	18	GO:0006552	BP	leucine catabolic process	18/14968	0.211598
leaf vs stem	58	GO:0005516	MF	calmodulin binding	58/14968	0.211678
leaf vs stem	59	GO:0000302	BP	response to reactive oxygen species	59/14968	0.213857
leaf vs stem	59	GO:0044242	BP	cellular lipid catabolic process	59/14968	0.213857
leaf vs stem	16	GO:1903409	BP	reactive oxygen species biosynthetic process	16/14968	0.214467
leaf vs stem	143	GO:0009416	BP	response to light stimulus	143/14968	0.215048
leaf vs stem	213	GO:0009570	CC	chloroplast stroma	213/14968	0.216617
leaf vs stem	213	GO:0009532	CC	plastid stroma	213/14968	0.216617
leaf vs stem	26	GO:0006452	BP	translational frameshifting	26/14968	0.218
leaf vs stem	26	GO:0045905	BP	positive regulation of translational termination	26/14968	0.218
leaf vs stem	26	GO:0045901	BP	positive regulation of translational elongation	26/14968	0.218
leaf vs stem	26	GO:0016597	MF	amino acid binding	26/14968	0.218
leaf vs stem	36	GO:0009267	BP	cellular response to starvation	36/14968	0.220177
leaf vs stem	36	GO:0005315	MF	inorganic phosphate transmembrane transporter activity	36/14968	0.220177
leaf vs stem	826	GO:0005829	CC	cytosol	826/14968	0.222483
leaf vs stem	207	GO:0006364	BP	rRNA processing	207/14968	0.222689
leaf vs stem	33	GO:0045333	BP	cellular respiration	33/14968	0.222689
leaf vs stem	33	GO:0009705	CC	plant-type vacuole membrane	33/14968	0.222689
leaf vs stem	40	GO:0006817	BP	phosphate ion transport	40/14968	0.22377
leaf vs stem	40	GO:0016635	MF	oxidoreductase activity, acting on the CH-CH group of donors, quinone or related compound as acceptor	40/14968	0.22377
leaf vs stem	981	GO:0016818	MF	hydrolase activity, acting on acid anhydrides, in phosphorus-containing anhydrides	981/14968	0.224272
leaf vs stem	79	GO:0015662	MF	ion transmembrane transporter activity, phosphorylative mechanism	79/14968	0.224915
leaf vs stem	43	GO:0098754	BP	detoxification	43/14968	0.224927
leaf vs stem	65	GO:0006873	BP	cellular ion homeostasis	65/14968	0.227211
leaf vs stem	27	GO:0006449	BP	regulation of translational termination	27/14968	0.227211
leaf vs stem	44	GO:0006101	BP	citrate metabolic process	44/14968	0.227211
leaf vs stem	3703	GO:1901265	MF	nucleoside phosphate binding	3703/14968	0.227211
leaf vs stem	3703	GO:0000166	MF	nucleotide binding	3703/14968	0.227211
leaf vs stem	71	GO:0015711	BP	organic anion transport	71/14968	0.231416
leaf vs stem	14	GO:0044571	BP	[2Fe-2S] cluster assembly	14/14968	0.232982
leaf vs stem	41	GO:0046129	BP	purine ribonucleoside biosynthetic process	41/14968	0.233055
leaf vs stem	41	GO:0042451	BP	purine nucleoside biosynthetic process	41/14968	0.233055
leaf vs stem	41	GO:0042455	BP	ribonucleoside biosynthetic process	41/14968	0.233055
leaf vs stem	41	GO:0009163	BP	nucleoside biosynthetic process	41/14968	0.233055
leaf vs stem	44	GO:1990542	BP	mitochondrial transmembrane transport	44/14968	0.233055
leaf vs stem	92	GO:0016709	MF	oxidoreductase activity, acting on paired donors, with incorporation or reduction of molecular oxygen, NAD(P)H as one donor, and incorporation of one atom of oxygen	92/14968	0.233055
leaf vs stem	34	GO:0042542	BP	response to hydrogen peroxide	34/14968	0.233155
leaf vs stem	27	GO:0009083	BP	branched-chain amino acid catabolic process	27/14968	0.233155
leaf vs stem	10	GO:0008216	BP	spermidine metabolic process	10/14968	0.233155
leaf vs stem	10	GO:0008295	BP	spermidine biosynthetic process	10/14968	0.233155
leaf vs stem	10	GO:0009773	BP	photosynthetic electron transport in photosystem I	10/14968	0.233155
leaf vs stem	3	GO:0007349	BP	cellularization	3/14968	0.233155
leaf vs stem	3	GO:0009558	BP	embryo sac cellularization	3/14968	0.233155
leaf vs stem	3	GO:0007112	BP	male meiosis cytokinesis	3/14968	0.233155
leaf vs stem	3	GO:0090379	BP	secondary cell wall biogenesis involved in seed trichome differentiation	3/14968	0.233155
leaf vs stem	3	GO:0045962	BP	positive regulation of development, heterochronic	3/14968	0.233155
leaf vs stem	3	GO:0033206	BP	meiotic cytokinesis	3/14968	0.233155
leaf vs stem	10	GO:0003960	MF	NADPH:quinone reductase activity	10/14968	0.233155
leaf vs stem	10	GO:0004019	MF	adenylosuccinate synthase activity	10/14968	0.233155
leaf vs stem	3	GO:0004043	MF	L-aminoadipate-semialdehyde dehydrogenase activity	3/14968	0.233155
leaf vs stem	3	GO:0070401	MF	NADP+ binding	3/14968	0.233155
leaf vs stem	3	GO:0047655	MF	allyl-alcohol dehydrogenase activity	3/14968	0.233155
leaf vs stem	3	GO:0008920	MF	lipopolysaccharide heptosyltransferase activity	3/14968	0.233155
leaf vs stem	3	GO:0047209	MF	coniferyl-alcohol glucosyltransferase activity	3/14968	0.233155
leaf vs stem	3	GO:0009977	MF	proton motive force dependent protein transmembrane transporter activity	3/14968	0.233155
leaf vs stem	3864	GO:0036094	MF	small molecule binding	3864/14968	0.234039
leaf vs stem	22	GO:0004449	MF	isocitrate dehydrogenase (NAD+) activity	22/14968	0.239658
leaf vs stem	45	GO:0009636	BP	response to toxic substance	45/14968	0.241
leaf vs stem	8	GO:0006105	BP	succinate metabolic process	8/14968	0.244782
leaf vs stem	8	GO:0006935	BP	chemotaxis	8/14968	0.244782
leaf vs stem	8	GO:0010183	BP	pollen tube guidance	8/14968	0.244782
leaf vs stem	8	GO:0050918	BP	positive chemotaxis	8/14968	0.244782
leaf vs stem	8	GO:0042330	BP	taxis	8/14968	0.244782
leaf vs stem	814	GO:0005886	CC	plasma membrane	814/14968	0.244782
leaf vs stem	8	GO:0045282	CC	plasma membrane succinate dehydrogenase complex	8/14968	0.244782
leaf vs stem	8	GO:0015288	MF	porin activity	8/14968	0.244782
leaf vs stem	8	GO:0015149	MF	hexose transmembrane transporter activity	8/14968	0.244782
leaf vs stem	8	GO:0015189	MF	L-lysine transmembrane transporter activity	8/14968	0.244782
leaf vs stem	8	GO:0022829	MF	wide pore channel activity	8/14968	0.244782
leaf vs stem	42	GO:1901659	BP	glycosyl compound biosynthetic process	42/14968	0.249508
leaf vs stem	28	GO:0016742	MF	hydroxymethyl-, formyl- and related transferase activity	28/14968	0.255104
leaf vs stem	12	GO:0019646	BP	aerobic electron transport chain	12/14968	0.256608
leaf vs stem	22	GO:0052646	BP	alditol phosphate metabolic process	22/14968	0.256608
leaf vs stem	22	GO:0006072	BP	glycerol-3-phosphate metabolic process	22/14968	0.256608
leaf vs stem	22	GO:0005854	CC	nascent polypeptide-associated complex	22/14968	0.256608
leaf vs stem	2465	GO:0046872	MF	metal ion binding	2465/14968	0.258135
leaf vs stem	39	GO:0015605	MF	organophosphate ester transmembrane transporter activity	39/14968	0.258436
leaf vs stem	1160	GO:0005737	CC	cytoplasm	1160/14968	0.262101
leaf vs stem	32	GO:0016624	MF	oxidoreductase activity, acting on the aldehyde or oxo group of donors, disulfide as acceptor	32/14968	0.262661
leaf vs stem	92	GO:0042493	BP	response to drug	92/14968	0.265381
leaf vs stem	36	GO:0015301	MF	anion:anion antiporter activity	36/14968	0.26772
leaf vs stem	36	GO:0140323	MF	solute:anion antiporter activity	36/14968	0.26772
leaf vs stem	4	GO:0033212	BP	iron import into cell	4/14968	0.268336
leaf vs stem	4	GO:0035494	BP	SNARE complex disassembly	4/14968	0.268336
leaf vs stem	4	GO:0033215	BP	reductive iron assimilation	4/14968	0.268336
leaf vs stem	17	GO:0010193	BP	response to ozone	17/14968	0.268336
leaf vs stem	5	GO:0098552	CC	side of membrane	5/14968	0.268336
leaf vs stem	4	GO:0042719	CC	mitochondrial intermembrane space protein transporter complex	4/14968	0.268336
leaf vs stem	4	GO:0072686	CC	mitotic spindle	4/14968	0.268336
leaf vs stem	23	GO:0031977	CC	thylakoid lumen	23/14968	0.268336
leaf vs stem	5	GO:0047061	MF	glucose-fructose oxidoreductase activity	5/14968	0.268336
leaf vs stem	5	GO:0016987	MF	sigma factor activity	5/14968	0.268336
leaf vs stem	5	GO:0003913	MF	DNA photolyase activity	5/14968	0.268336
leaf vs stem	5	GO:0030749	MF	loganate O-methyltransferase activity	5/14968	0.268336
leaf vs stem	5	GO:0004803	MF	transposase activity	5/14968	0.268336
leaf vs stem	5	GO:0000064	MF	L-ornithine transmembrane transporter activity	5/14968	0.268336
leaf vs stem	5	GO:0004303	MF	estradiol 17-beta-dehydrogenase activity	5/14968	0.268336
leaf vs stem	4	GO:0004853	MF	uroporphyrinogen decarboxylase activity	4/14968	0.268336
leaf vs stem	4	GO:0050645	MF	limonoid glucosyltransferase activity	4/14968	0.268336
leaf vs stem	4	GO:0010277	MF	chlorophyllide a oxygenase [overall] activity	4/14968	0.268336
leaf vs stem	4	GO:0004366	MF	glycerol-3-phosphate O-acyltransferase activity	4/14968	0.268336
leaf vs stem	4	GO:0102420	MF	sn-1-glycerol-3-phosphate C16:0-DCA-CoA acyl transferase activity	4/14968	0.268336
leaf vs stem	17	GO:0019209	MF	kinase activator activity	17/14968	0.268336
leaf vs stem	17	GO:0030295	MF	protein kinase activator activity	17/14968	0.268336
leaf vs stem	57	GO:0051084	BP	'de novo' posttranslational protein folding	57/14968	0.268511
leaf vs stem	57	GO:0051085	BP	chaperone cofactor-dependent protein refolding	57/14968	0.268511
leaf vs stem	20	GO:0031428	CC	box C/D snoRNP complex	20/14968	0.268511
leaf vs stem	77	GO:0030247	MF	polysaccharide binding	77/14968	0.268511
leaf vs stem	20	GO:0004032	MF	alditol:NADP+ 1-oxidoreductase activity	20/14968	0.268511
leaf vs stem	40	GO:0055067	BP	monovalent inorganic cation homeostasis	40/14968	0.269584
leaf vs stem	72	GO:0055082	BP	cellular chemical homeostasis	72/14968	0.272481
leaf vs stem	29	GO:0032440	MF	2-alkenal reductase [NAD(P)] activity	29/14968	0.273055
leaf vs stem	256	GO:0005623	CC	cell	256/14968	0.275902
leaf vs stem	33	GO:0006662	BP	glycerol ether metabolic process	33/14968	0.277025
leaf vs stem	33	GO:0018904	BP	ether metabolic process	33/14968	0.277025
leaf vs stem	67	GO:0009521	CC	photosystem	67/14968	0.277025
leaf vs stem	128	GO:0016765	MF	transferase activity, transferring alkyl or aryl (other than methyl) groups	128/14968	0.277025
leaf vs stem	158	GO:0000287	MF	magnesium ion binding	158/14968	0.277025
leaf vs stem	78	GO:1901617	BP	organic hydroxy compound biosynthetic process	78/14968	0.278138
leaf vs stem	13	GO:0042256	BP	mature ribosome assembly	13/14968	0.278658
leaf vs stem	13	GO:0008470	MF	isovaleryl-CoA dehydrogenase activity	13/14968	0.278658
leaf vs stem	85	GO:0006417	BP	regulation of translation	85/14968	0.285636
leaf vs stem	7	GO:1902644	BP	tertiary alcohol metabolic process	7/14968	0.286626
leaf vs stem	7	GO:0043200	BP	response to amino acid	7/14968	0.286626
leaf vs stem	7	GO:0009682	BP	induced systemic resistance	7/14968	0.286626
leaf vs stem	7	GO:0009687	BP	abscisic acid metabolic process	7/14968	0.286626
leaf vs stem	7	GO:0043288	BP	apocarotenoid metabolic process	7/14968	0.286626
leaf vs stem	984	GO:0016817	MF	hydrolase activity, acting on acid anhydrides	984/14968	0.286626
leaf vs stem	7	GO:0008957	MF	phenylacetaldehyde dehydrogenase activity	7/14968	0.286626
leaf vs stem	7	GO:0015150	MF	fucose transmembrane transporter activity	7/14968	0.286626
leaf vs stem	37	GO:0005732	CC	small nucleolar ribonucleoprotein complex	37/14968	0.286859
leaf vs stem	26	GO:0030976	MF	thiamine pyrophosphate binding	26/14968	0.286859
leaf vs stem	9	GO:0010229	BP	inflorescence development	9/14968	0.287355
leaf vs rootⅠ	24	GO:0010336	BP	gibberellic acid homeostasis	24/15700	0.000277982
leaf vs rootⅠ	50	GO:0009695	BP	jasmonic acid biosynthetic process	50/15700	0.000277982
leaf vs rootⅠ	59	GO:0009809	BP	lignin biosynthetic process	59/15700	0.000277982
leaf vs rootⅠ	75	GO:0009699	BP	phenylpropanoid biosynthetic process	75/15700	0.000277982
leaf vs rootⅠ	99	GO:0044550	BP	secondary metabolite biosynthetic process	99/15700	0.000277982
leaf vs rootⅠ	54	GO:0009694	BP	jasmonic acid metabolic process	54/15700	0.000277982
leaf vs rootⅠ	104	GO:0000028	BP	ribosomal small subunit assembly	104/15700	0.000277982
leaf vs rootⅠ	155	GO:0006633	BP	fatty acid biosynthetic process	155/15700	0.000277982
leaf vs rootⅠ	163	GO:0002181	BP	cytoplasmic translation	163/15700	0.000277982
leaf vs rootⅠ	209	GO:0022613	BP	ribonucleoprotein complex biogenesis	209/15700	0.000277982
leaf vs rootⅠ	213	GO:0006631	BP	fatty acid metabolic process	213/15700	0.000277982
leaf vs rootⅠ	117	GO:0072329	BP	monocarboxylic acid catabolic process	117/15700	0.000277982
leaf vs rootⅠ	152	GO:0000027	BP	ribosomal large subunit assembly	152/15700	0.000277982
leaf vs rootⅠ	165	GO:0006414	BP	translational elongation	165/15700	0.000277982
leaf vs rootⅠ	73	GO:0120029	BP	proton export across plasma membrane	73/15700	0.000277982
leaf vs rootⅠ	73	GO:0140115	BP	export across plasma membrane	73/15700	0.000277982
leaf vs rootⅠ	131	GO:0042254	BP	ribosome biogenesis	131/15700	0.000277982
leaf vs rootⅠ	249	GO:0016999	BP	antibiotic metabolic process	249/15700	0.000277982
leaf vs rootⅠ	194	GO:0072330	BP	monocarboxylic acid biosynthetic process	194/15700	0.000277982
leaf vs rootⅠ	70	GO:0042273	BP	ribosomal large subunit biogenesis	70/15700	0.000277982
leaf vs rootⅠ	254	GO:1902600	BP	proton transmembrane transport	254/15700	0.000277982
leaf vs rootⅠ	225	GO:0006099	BP	tricarboxylic acid cycle	225/15700	0.000277982
leaf vs rootⅠ	278	GO:0098655	BP	cation transmembrane transport	278/15700	0.000277982
leaf vs rootⅠ	318	GO:0034220	BP	ion transmembrane transport	318/15700	0.000277982
leaf vs rootⅠ	272	GO:0098662	BP	inorganic cation transmembrane transport	272/15700	0.000277982
leaf vs rootⅠ	282	GO:0098660	BP	inorganic ion transmembrane transport	282/15700	0.000277982
leaf vs rootⅠ	270	GO:0015672	BP	monovalent inorganic cation transport	270/15700	0.000277982
leaf vs rootⅠ	194	GO:0045454	BP	cell redox homeostasis	194/15700	0.000277982
leaf vs rootⅠ	106	GO:0001732	BP	formation of cytoplasmic translation initiation complex	106/15700	0.000277982
leaf vs rootⅠ	415	GO:0022618	BP	ribonucleoprotein complex assembly	415/15700	0.000277982
leaf vs rootⅠ	429	GO:0006091	BP	generation of precursor metabolites and energy	429/15700	0.000277982
leaf vs rootⅠ	417	GO:0071826	BP	ribonucleoprotein complex subunit organization	417/15700	0.000277982
leaf vs rootⅠ	482	GO:0055114	BP	oxidation-reduction process	482/15700	0.000277982
leaf vs rootⅠ	104	GO:0042026	BP	protein refolding	104/15700	0.000277982
leaf vs rootⅠ	448	GO:0051186	BP	cofactor metabolic process	448/15700	0.000277982
leaf vs rootⅠ	68	GO:0009808	BP	lignin metabolic process	68/15700	0.000277982
leaf vs rootⅠ	471	GO:0006811	BP	ion transport	471/15700	0.000277982
leaf vs rootⅠ	43	GO:0055088	BP	lipid homeostasis	43/15700	0.000277982
leaf vs rootⅠ	545	GO:0032787	BP	monocarboxylic acid metabolic process	545/15700	0.000277982
leaf vs rootⅠ	67	GO:0005758	CC	mitochondrial intermembrane space	67/15700	0.000277982
leaf vs rootⅠ	67	GO:0031970	CC	organelle envelope lumen	67/15700	0.000277982
leaf vs rootⅠ	139	GO:0042788	CC	polysomal ribosome	139/15700	0.000277982
leaf vs rootⅠ	64	GO:0009514	CC	glyoxysome	64/15700	0.000277982
leaf vs rootⅠ	146	GO:0022626	CC	cytosolic ribosome	146/15700	0.000277982
leaf vs rootⅠ	196	GO:0005777	CC	peroxisome	196/15700	0.000277982
leaf vs rootⅠ	195	GO:0031974	CC	membrane-enclosed lumen	195/15700	0.000277982
leaf vs rootⅠ	195	GO:0070013	CC	intracellular organelle lumen	195/15700	0.000277982
leaf vs rootⅠ	195	GO:0043233	CC	organelle lumen	195/15700	0.000277982
leaf vs rootⅠ	224	GO:0031966	CC	mitochondrial membrane	224/15700	0.000277982
leaf vs rootⅠ	204	GO:0042579	CC	microbody	204/15700	0.000277982
leaf vs rootⅠ	182	GO:0005743	CC	mitochondrial inner membrane	182/15700	0.000277982
leaf vs rootⅠ	433	GO:0022627	CC	cytosolic small ribosomal subunit	433/15700	0.000277982
leaf vs rootⅠ	259	GO:0005774	CC	vacuolar membrane	259/15700	0.000277982
leaf vs rootⅠ	585	GO:0015935	CC	small ribosomal subunit	585/15700	0.000277982
leaf vs rootⅠ	597	GO:0022625	CC	cytosolic large ribosomal subunit	597/15700	0.000277982
leaf vs rootⅠ	711	GO:0015934	CC	large ribosomal subunit	711/15700	0.000277982
leaf vs rootⅠ	42	GO:0004022	MF	alcohol dehydrogenase (NAD) activity	42/15700	0.000277982
leaf vs rootⅠ	49	GO:0052747	MF	sinapyl alcohol dehydrogenase activity	49/15700	0.000277982
leaf vs rootⅠ	60	GO:0016832	MF	aldehyde-lyase activity	60/15700	0.000277982
leaf vs rootⅠ	43	GO:0102132	MF	3-oxo-pimeloyl-[acp] methyl ester reductase activity	43/15700	0.000277982
leaf vs rootⅠ	43	GO:0102131	MF	3-oxo-glutaryl-[acp] methyl ester reductase activity	43/15700	0.000277982
leaf vs rootⅠ	59	GO:0004316	MF	3-oxoacyl-[acyl-carrier-protein] reductase (NADPH) activity	59/15700	0.000277982
leaf vs rootⅠ	75	GO:0045551	MF	cinnamyl-alcohol dehydrogenase activity	75/15700	0.000277982
leaf vs rootⅠ	43	GO:0016629	MF	12-oxophytodienoate reductase activity	43/15700	0.000277982
leaf vs rootⅠ	30	GO:0004150	MF	dihydroneopterin aldolase activity	30/15700	0.000277982
leaf vs rootⅠ	66	GO:0004312	MF	fatty acid synthase activity	66/15700	0.000277982
leaf vs rootⅠ	77	GO:0051537	MF	2 iron, 2 sulfur cluster binding	77/15700	0.000277982
leaf vs rootⅠ	66	GO:0016717	MF	oxidoreductase activity, acting on paired donors, with oxidation of a pair of donors resulting in the reduction of molecular oxygen to two molecules of water	66/15700	0.000277982
leaf vs rootⅠ	144	GO:0010181	MF	FMN binding	144/15700	0.000277982
leaf vs rootⅠ	38	GO:0003959	MF	NADPH dehydrogenase activity	38/15700	0.000277982
leaf vs rootⅠ	38	GO:0018548	MF	pentaerythritol trinitrate reductase activity	38/15700	0.000277982
leaf vs rootⅠ	38	GO:0052690	MF	trichloro-p-hydroquinone reductive dehalogenase activity	38/15700	0.000277982
leaf vs rootⅠ	51	GO:0016661	MF	oxidoreductase activity, acting on other nitrogenous compounds as donors	51/15700	0.000277982
leaf vs rootⅠ	98	GO:0016628	MF	oxidoreductase activity, acting on the CH-CH group of donors, NAD or NADP as acceptor	98/15700	0.000277982
leaf vs rootⅠ	215	GO:0016627	MF	oxidoreductase activity, acting on the CH-CH group of donors	215/15700	0.000277982
leaf vs rootⅠ	185	GO:0050661	MF	NADP binding	185/15700	0.000277982
leaf vs rootⅠ	207	GO:0016667	MF	oxidoreductase activity, acting on a sulfur group of donors	207/15700	0.000277982
leaf vs rootⅠ	239	GO:0019829	MF	ATPase-coupled cation transmembrane transporter activity	239/15700	0.000277982
leaf vs rootⅠ	223	GO:0016830	MF	carbon-carbon lyase activity	223/15700	0.000277982
leaf vs rootⅠ	117	GO:0046933	MF	proton-transporting ATP synthase activity, rotational mechanism	117/15700	0.000277982
leaf vs rootⅠ	242	GO:0009055	MF	electron transfer activity	242/15700	0.000277982
leaf vs rootⅠ	242	GO:0042625	MF	ATPase-coupled ion transmembrane transporter activity	242/15700	0.000277982
leaf vs rootⅠ	56	GO:0004029	MF	aldehyde dehydrogenase (NAD) activity	56/15700	0.000277982
leaf vs rootⅠ	233	GO:0016651	MF	oxidoreductase activity, acting on NAD(P)H	233/15700	0.000277982
leaf vs rootⅠ	304	GO:0019843	MF	rRNA binding	304/15700	0.000277982
leaf vs rootⅠ	264	GO:0051287	MF	NAD binding	264/15700	0.000277982
leaf vs rootⅠ	87	GO:0016744	MF	transferase activity, transferring aldehyde or ketonic groups	87/15700	0.000277982
leaf vs rootⅠ	43	GO:0004801	MF	sedoheptulose-7-phosphate:D-glyceraldehyde-3-phosphate glyceronetransferase activity	43/15700	0.000277982
leaf vs rootⅠ	278	GO:0003746	MF	translation elongation factor activity	278/15700	0.000277982
leaf vs rootⅠ	357	GO:0015078	MF	proton transmembrane transporter activity	357/15700	0.000277982
leaf vs rootⅠ	254	GO:0003729	MF	mRNA binding	254/15700	0.000277982
leaf vs rootⅠ	17	GO:0046029	MF	mannitol dehydrogenase activity	17/15700	0.000277982
leaf vs rootⅠ	17	GO:0031320	MF	hexitol dehydrogenase activity	17/15700	0.000277982
leaf vs rootⅠ	546	GO:0016616	MF	oxidoreductase activity, acting on the CH-OH group of donors, NAD or NADP as acceptor	546/15700	0.000277982
leaf vs rootⅠ	385	GO:0015077	MF	monovalent inorganic cation transmembrane transporter activity	385/15700	0.000277982
leaf vs rootⅠ	141	GO:0044769	MF	ATPase activity, coupled to transmembrane movement of ions, rotational mechanism	141/15700	0.000277982
leaf vs rootⅠ	392	GO:0020037	MF	heme binding	392/15700	0.000277982
leaf vs rootⅠ	533	GO:0008135	MF	translation factor activity, RNA binding	533/15700	0.000277982
leaf vs rootⅠ	447	GO:0046906	MF	tetrapyrrole binding	447/15700	0.000277982
leaf vs rootⅠ	529	GO:0034622	BP	cellular protein-containing complex assembly	529/15700	0.000281626
leaf vs rootⅠ	534	GO:0090079	MF	translation regulator activity, nucleic acid binding	534/15700	0.000281626
leaf vs rootⅠ	534	GO:0045182	MF	translation regulator activity	534/15700	0.000281626
leaf vs rootⅠ	517	GO:0044429	CC	mitochondrial part	517/15700	0.000287677
leaf vs rootⅠ	595	GO:0016614	MF	oxidoreductase activity, acting on CH-OH group of donors	595/15700	0.000287677
leaf vs rootⅠ	554	GO:0065003	BP	protein-containing complex assembly	554/15700	0.000291199
leaf vs rootⅠ	623	GO:0022607	BP	cellular component assembly	623/15700	0.000291199
leaf vs rootⅠ	572	GO:0017144	BP	drug metabolic process	572/15700	0.000291199
leaf vs rootⅠ	650	GO:0015318	MF	inorganic molecular entity transmembrane transporter activity	650/15700	0.000292928
leaf vs rootⅠ	598	GO:0043933	BP	protein-containing complex subunit organization	598/15700	0.000298372
leaf vs rootⅠ	659	GO:0015075	MF	ion transmembrane transporter activity	659/15700	0.000298372
leaf vs rootⅠ	910	GO:0050662	MF	coenzyme binding	910/15700	0.000298372
leaf vs rootⅠ	573	GO:0065008	BP	regulation of biological quality	573/15700	0.00029893
leaf vs rootⅠ	293	GO:0005730	CC	nucleolus	293/15700	0.000305331
leaf vs rootⅠ	1113	GO:0044445	CC	cytosolic part	1113/15700	0.00031318
leaf vs rootⅠ	193	GO:0019866	CC	organelle inner membrane	193/15700	0.000322852
leaf vs rootⅠ	347	GO:0010035	BP	response to inorganic substance	347/15700	0.00032328
leaf vs rootⅠ	244	GO:0044436	CC	thylakoid part	244/15700	0.000329865
leaf vs rootⅠ	48	GO:0031408	BP	oxylipin biosynthetic process	48/15700	0.000330029
leaf vs rootⅠ	48	GO:0031407	BP	oxylipin metabolic process	48/15700	0.000330029
leaf vs rootⅠ	1155	GO:0005215	MF	transporter activity	1155/15700	0.000330029
leaf vs rootⅠ	1190	GO:0043436	BP	oxoacid metabolic process	1190/15700	0.00033022
leaf vs rootⅠ	1296	GO:0044391	CC	ribosomal subunit	1296/15700	0.00033022
leaf vs rootⅠ	1154	GO:0019752	BP	carboxylic acid metabolic process	1154/15700	0.000333394
leaf vs rootⅠ	1119	GO:0022857	MF	transmembrane transporter activity	1119/15700	0.000333394
leaf vs rootⅠ	13	GO:0047681	MF	aryl-alcohol dehydrogenase (NADP+) activity	13/15700	0.000333394
leaf vs rootⅠ	13	GO:0008812	MF	choline dehydrogenase activity	13/15700	0.000333394
leaf vs rootⅠ	1196	GO:0006082	BP	organic acid metabolic process	1196/15700	0.000334202
leaf vs rootⅠ	487	GO:0008324	MF	cation transmembrane transporter activity	487/15700	0.000334202
leaf vs rootⅠ	1559	GO:0048037	MF	cofactor binding	1559/15700	0.000363271
leaf vs rootⅠ	275	GO:0003743	MF	translation initiation factor activity	275/15700	0.000366394
leaf vs rootⅠ	369	GO:0009150	BP	purine ribonucleotide metabolic process	369/15700	0.000368812
leaf vs rootⅠ	2150	GO:0006412	BP	translation	2150/15700	0.000372457
leaf vs rootⅠ	2100	GO:0005840	CC	ribosome	2100/15700	0.000372457
leaf vs rootⅠ	359	GO:0042592	BP	homeostatic process	359/15700	0.000375546
leaf vs rootⅠ	376	GO:0006163	BP	purine nucleotide metabolic process	376/15700	0.000375546
leaf vs rootⅠ	1803	GO:0003723	MF	RNA binding	1803/15700	0.000376178
leaf vs rootⅠ	2338	GO:0043603	BP	cellular amide metabolic process	2338/15700	0.000376507
leaf vs rootⅠ	1785	GO:0044281	BP	small molecule metabolic process	1785/15700	0.000381597
leaf vs rootⅠ	2184	GO:0006518	BP	peptide metabolic process	2184/15700	0.000381597
leaf vs rootⅠ	2372	GO:0043228	CC	non-membrane-bounded organelle	2372/15700	0.000381597
leaf vs rootⅠ	2372	GO:0043232	CC	intracellular non-membrane-bounded organelle	2372/15700	0.000381597
leaf vs rootⅠ	2254	GO:0003735	MF	structural constituent of ribosome	2254/15700	0.000381597
leaf vs rootⅠ	2225	GO:0043604	BP	amide biosynthetic process	2225/15700	0.000381776
leaf vs rootⅠ	231	GO:0050660	MF	flavin adenine dinucleotide binding	231/15700	0.000381776
leaf vs rootⅠ	2155	GO:0043043	BP	peptide biosynthetic process	2155/15700	0.000383076
leaf vs rootⅠ	189	GO:0016054	BP	organic acid catabolic process	189/15700	0.000385714
leaf vs rootⅠ	189	GO:0046395	BP	carboxylic acid catabolic process	189/15700	0.000385714
leaf vs rootⅠ	2302	GO:0005198	MF	structural molecule activity	2302/15700	0.000385714
leaf vs rootⅠ	2402	GO:0034645	BP	cellular macromolecule biosynthetic process	2402/15700	0.000386683
leaf vs rootⅠ	2456	GO:0009059	BP	macromolecule biosynthetic process	2456/15700	0.000387989
leaf vs rootⅠ	241	GO:0006164	BP	purine nucleotide biosynthetic process	241/15700	0.000394747
leaf vs rootⅠ	71	GO:0042446	BP	hormone biosynthetic process	71/15700	0.000394747
leaf vs rootⅠ	2730	GO:0044271	BP	cellular nitrogen compound biosynthetic process	2730/15700	0.000394747
leaf vs rootⅠ	2831	GO:1901566	BP	organonitrogen compound biosynthetic process	2831/15700	0.000394747
leaf vs rootⅠ	14144	GO:0003674	MF	molecular_function	14144/15700	0.000394747
leaf vs rootⅠ	2721	GO:1990904	CC	ribonucleoprotein complex	2721/15700	0.000394851
leaf vs rootⅠ	237	GO:0009152	BP	purine ribonucleotide biosynthetic process	237/15700	0.000395213
leaf vs rootⅠ	2658	GO:0016491	MF	oxidoreductase activity	2658/15700	0.000396279
leaf vs rootⅠ	203	GO:0046686	BP	response to cadmium ion	203/15700	0.000400572
leaf vs rootⅠ	2863	GO:0019538	BP	protein metabolic process	2863/15700	0.000403486
leaf vs rootⅠ	400	GO:0072521	BP	purine-containing compound metabolic process	400/15700	0.000403888
leaf vs rootⅠ	2654	GO:0044267	BP	cellular protein metabolic process	2654/15700	0.000403888
leaf vs rootⅠ	262	GO:0072522	BP	purine-containing compound biosynthetic process	262/15700	0.000416552
leaf vs rootⅠ	3645	GO:0044249	BP	cellular biosynthetic process	3645/15700	0.000431641
leaf vs rootⅠ	3857	GO:0009058	BP	biosynthetic process	3857/15700	0.000446832
leaf vs rootⅠ	3694	GO:1901576	BP	organic substance biosynthetic process	3694/15700	0.000446832
leaf vs rootⅠ	3750	GO:0034641	BP	cellular nitrogen compound metabolic process	3750/15700	0.000448228
leaf vs rootⅠ	3985	GO:1901564	BP	organonitrogen compound metabolic process	3985/15700	0.000452255
leaf vs rootⅠ	38	GO:0016018	MF	cyclosporin A binding	38/15700	0.000452255
leaf vs rootⅠ	3804	GO:0032991	CC	protein-containing complex	3804/15700	0.000453772
leaf vs rootⅠ	80	GO:0031386	MF	protein tag	80/15700	0.000455392
leaf vs rootⅠ	470	GO:0016829	MF	lyase activity	470/15700	0.000464126
leaf vs rootⅠ	108	GO:0006098	BP	pentose-phosphate shunt	108/15700	0.000465999
leaf vs rootⅠ	134	GO:0015985	BP	energy coupled proton transport, down electrochemical gradient	134/15700	0.000468785
leaf vs rootⅠ	134	GO:0015986	BP	ATP synthesis coupled proton transport	134/15700	0.000468785
leaf vs rootⅠ	5527	GO:0044444	CC	cytoplasmic part	5527/15700	0.000482636
leaf vs rootⅠ	4968	GO:0043229	CC	intracellular organelle	4968/15700	0.000482636
leaf vs rootⅠ	4970	GO:0043226	CC	organelle	4970/15700	0.000482636
leaf vs rootⅠ	199	GO:0051540	MF	metal cluster binding	199/15700	0.000482636
leaf vs rootⅠ	199	GO:0051536	MF	iron-sulfur cluster binding	199/15700	0.000482636
leaf vs rootⅠ	454	GO:0022890	MF	inorganic cation transmembrane transporter activity	454/15700	0.000482636
leaf vs rootⅠ	6243	GO:0044237	BP	cellular metabolic process	6243/15700	0.00050571
leaf vs rootⅠ	86	GO:0009698	BP	phenylpropanoid metabolic process	86/15700	0.00050571
leaf vs rootⅠ	7072	GO:0008152	BP	metabolic process	7072/15700	0.00050571
leaf vs rootⅠ	6406	GO:0071704	BP	organic substance metabolic process	6406/15700	0.00050571
leaf vs rootⅠ	7640	GO:0044424	CC	intracellular part	7640/15700	0.00050571
leaf vs rootⅠ	8246	GO:0044464	CC	cell part	8246/15700	0.00050571
leaf vs rootⅠ	349	GO:0006812	BP	cation transport	349/15700	0.000516534
leaf vs rootⅠ	485	GO:0055085	BP	transmembrane transport	485/15700	0.000522732
leaf vs rootⅠ	59	GO:0070180	MF	large ribosomal subunit rRNA binding	59/15700	0.00053288
leaf vs rootⅠ	7853	GO:0009987	BP	cellular process	7853/15700	0.000534189
leaf vs rootⅠ	107	GO:0005759	CC	mitochondrial matrix	107/15700	0.00053687
leaf vs rootⅠ	579	GO:0006629	BP	lipid metabolic process	579/15700	0.000542381
leaf vs rootⅠ	170	GO:0017001	BP	antibiotic catabolic process	170/15700	0.000557668
leaf vs rootⅠ	381	GO:0009259	BP	ribonucleotide metabolic process	381/15700	0.000566993
leaf vs rootⅠ	134	GO:0006754	BP	ATP biosynthetic process	134/15700	0.000584414
leaf vs rootⅠ	384	GO:0019693	BP	ribose phosphate metabolic process	384/15700	0.000614789
leaf vs rootⅠ	9871	GO:0008150	BP	biological_process	9871/15700	0.000618275
leaf vs rootⅠ	96	GO:0016282	CC	eukaryotic 43S preinitiation complex	96/15700	0.000634815
leaf vs rootⅠ	109	GO:0006740	BP	NADPH regeneration	109/15700	0.000672793
leaf vs rootⅠ	97	GO:0005852	CC	eukaryotic translation initiation factor 3 complex	97/15700	0.000674726
leaf vs rootⅠ	47	GO:0004611	MF	phosphoenolpyruvate carboxykinase activity	47/15700	0.000793339
leaf vs rootⅠ	320	GO:0016903	MF	oxidoreductase activity, acting on the aldehyde or oxo group of donors	320/15700	0.000830593
leaf vs rootⅠ	263	GO:0044437	CC	vacuolar part	263/15700	0.000846263
leaf vs rootⅠ	258	GO:0019725	BP	cellular homeostasis	258/15700	0.000853765
leaf vs rootⅠ	146	GO:0009145	BP	purine nucleoside triphosphate biosynthetic process	146/15700	0.000863631
leaf vs rootⅠ	146	GO:0009206	BP	purine ribonucleoside triphosphate biosynthetic process	146/15700	0.000863631
leaf vs rootⅠ	146	GO:0009205	BP	purine ribonucleoside triphosphate metabolic process	146/15700	0.000863631
leaf vs rootⅠ	105	GO:0043022	MF	ribosome binding	105/15700	0.000873605
leaf vs rootⅠ	94	GO:0000470	BP	maturation of LSU-rRNA	94/15700	0.000939934
leaf vs rootⅠ	137	GO:0043021	MF	ribonucleoprotein complex binding	137/15700	0.000971202
leaf vs rootⅠ	72	GO:0004096	MF	catalase activity	72/15700	0.00102309
leaf vs rootⅠ	44	GO:0015942	BP	formate metabolic process	44/15700	0.00103134
leaf vs rootⅠ	44	GO:0008863	MF	formate dehydrogenase (NAD+) activity	44/15700	0.00103134
leaf vs rootⅠ	245	GO:0044282	BP	small molecule catabolic process	245/15700	0.00107158
leaf vs rootⅠ	626	GO:0044283	BP	small molecule biosynthetic process	626/15700	0.00107158
leaf vs rootⅠ	250	GO:0009260	BP	ribonucleotide biosynthetic process	250/15700	0.00107316
leaf vs rootⅠ	147	GO:0009144	BP	purine nucleoside triphosphate metabolic process	147/15700	0.00117638
leaf vs rootⅠ	1343	GO:0050896	BP	response to stimulus	1343/15700	0.00119342
leaf vs rootⅠ	96	GO:0045261	CC	proton-transporting ATP synthase complex, catalytic core F(1)	96/15700	0.00119342
leaf vs rootⅠ	197	GO:0009651	BP	response to salt stress	197/15700	0.00125222
leaf vs rootⅠ	225	GO:0010038	BP	response to metal ion	225/15700	0.00125712
leaf vs rootⅠ	43	GO:0042183	BP	formate catabolic process	43/15700	0.0013151
leaf vs rootⅠ	43	GO:0004451	MF	isocitrate lyase activity	43/15700	0.0013151
leaf vs rootⅠ	256	GO:0046034	BP	ATP metabolic process	256/15700	0.00134844
leaf vs rootⅠ	252	GO:0046390	BP	ribose phosphate biosynthetic process	252/15700	0.00137506
leaf vs rootⅠ	424	GO:0009117	BP	nucleotide metabolic process	424/15700	0.0014634
leaf vs rootⅠ	25	GO:0055081	BP	anion homeostasis	25/15700	0.00148155
leaf vs rootⅠ	14	GO:0019285	BP	glycine betaine biosynthetic process from choline	14/15700	0.00151802
leaf vs rootⅠ	14	GO:0006577	BP	amino-acid betaine metabolic process	14/15700	0.00151802
leaf vs rootⅠ	14	GO:0006578	BP	amino-acid betaine biosynthetic process	14/15700	0.00151802
leaf vs rootⅠ	14	GO:0019695	BP	choline metabolic process	14/15700	0.00151802
leaf vs rootⅠ	14	GO:0031455	BP	glycine betaine metabolic process	14/15700	0.00151802
leaf vs rootⅠ	14	GO:0031456	BP	glycine betaine biosynthetic process	14/15700	0.00151802
leaf vs rootⅠ	235	GO:0044085	BP	cellular component biogenesis	235/15700	0.00153887
leaf vs rootⅠ	442	GO:0001883	MF	purine nucleoside binding	442/15700	0.0015561
leaf vs rootⅠ	442	GO:0005525	MF	GTP binding	442/15700	0.0015561
leaf vs rootⅠ	442	GO:0032561	MF	guanyl ribonucleotide binding	442/15700	0.0015561
leaf vs rootⅠ	442	GO:0019001	MF	guanyl nucleotide binding	442/15700	0.0015561
leaf vs rootⅠ	442	GO:0032550	MF	purine ribonucleoside binding	442/15700	0.0015561
leaf vs rootⅠ	508	GO:0055086	BP	nucleobase-containing small molecule metabolic process	508/15700	0.00159633
leaf vs rootⅠ	157	GO:0009142	BP	nucleoside triphosphate biosynthetic process	157/15700	0.00171469
leaf vs rootⅠ	205	GO:0006970	BP	response to osmotic stress	205/15700	0.00174424
leaf vs rootⅠ	5839	GO:0044238	BP	primary metabolic process	5839/15700	0.00175729
leaf vs rootⅠ	154	GO:0009199	BP	ribonucleoside triphosphate metabolic process	154/15700	0.00176
leaf vs rootⅠ	154	GO:0009201	BP	ribonucleoside triphosphate biosynthetic process	154/15700	0.00176
leaf vs rootⅠ	288	GO:0016620	MF	oxidoreductase activity, acting on the aldehyde or oxo group of donors, NAD or NADP as acceptor	288/15700	0.00183918
leaf vs rootⅠ	42	GO:0004612	MF	phosphoenolpyruvate carboxykinase (ATP) activity	42/15700	0.00184458
leaf vs rootⅠ	117	GO:0006739	BP	NADP metabolic process	117/15700	0.0018559
leaf vs rootⅠ	361	GO:0003924	MF	GTPase activity	361/15700	0.00192113
leaf vs rootⅠ	96	GO:0033290	CC	eukaryotic 48S preinitiation complex	96/15700	0.00225707
leaf vs rootⅠ	96	GO:0070993	CC	translation preinitiation complex	96/15700	0.00225707
leaf vs rootⅠ	112	GO:0051156	BP	glucose 6-phosphate metabolic process	112/15700	0.00225966
leaf vs rootⅠ	75	GO:0008553	MF	proton-exporting ATPase activity, phosphorylative mechanism	75/15700	0.00229534
leaf vs rootⅠ	116	GO:0140352	BP	export from cell	116/15700	0.00233614
leaf vs rootⅠ	222	GO:0006732	BP	coenzyme metabolic process	222/15700	0.00233614
leaf vs rootⅠ	113	GO:0015036	MF	disulfide oxidoreductase activity	113/15700	0.00244739
leaf vs rootⅠ	117	GO:0033178	CC	proton-transporting two-sector ATPase complex, catalytic domain	117/15700	0.00253616
leaf vs rootⅠ	426	GO:0006753	BP	nucleoside phosphate metabolic process	426/15700	0.00279257
leaf vs rootⅠ	150	GO:0048878	BP	chemical homeostasis	150/15700	0.00282107
leaf vs rootⅠ	610	GO:0042221	BP	response to chemical	610/15700	0.0029449
leaf vs rootⅠ	31	GO:0009654	CC	photosystem II oxygen evolving complex	31/15700	0.00294871
leaf vs rootⅠ	89	GO:0042445	BP	hormone metabolic process	89/15700	0.00297272
leaf vs rootⅠ	240	GO:0006979	BP	response to oxidative stress	240/15700	0.00300234
leaf vs rootⅠ	216	GO:0051188	BP	cofactor biosynthetic process	216/15700	0.00319978
leaf vs rootⅠ	107	GO:0010817	BP	regulation of hormone levels	107/15700	0.00331449
leaf vs rootⅠ	137	GO:0019748	BP	secondary metabolic process	137/15700	0.00341471
leaf vs rootⅠ	447	GO:0016053	BP	organic acid biosynthetic process	447/15700	0.0034557
leaf vs rootⅠ	447	GO:0046394	BP	carboxylic acid biosynthetic process	447/15700	0.0034557
leaf vs rootⅠ	444	GO:0032549	MF	ribonucleoside binding	444/15700	0.00376924
leaf vs rootⅠ	282	GO:1901293	BP	nucleoside phosphate biosynthetic process	282/15700	0.00393438
leaf vs rootⅠ	444	GO:0001882	MF	nucleoside binding	444/15700	0.00422126
leaf vs rootⅠ	279	GO:0009165	BP	nucleotide biosynthetic process	279/15700	0.00422683
leaf vs rootⅠ	258	GO:0051082	MF	unfolded protein binding	258/15700	0.00447162
leaf vs rootⅠ	69	GO:0042133	BP	neurotransmitter metabolic process	69/15700	0.0047198
leaf vs rootⅠ	69	GO:0001505	BP	regulation of neurotransmitter levels	69/15700	0.0047198
leaf vs rootⅠ	11	GO:0048443	BP	stamen development	11/15700	0.00505017
leaf vs rootⅠ	484	GO:0044434	CC	chloroplast part	484/15700	0.0053836
leaf vs rootⅠ	321	GO:0008610	BP	lipid biosynthetic process	321/15700	0.00559776
leaf vs rootⅠ	640	GO:1901135	BP	carbohydrate derivative metabolic process	640/15700	0.00599342
leaf vs rootⅠ	94	GO:0015035	MF	protein disulfide oxidoreductase activity	94/15700	0.00653881
leaf vs rootⅠ	107	GO:0042493	BP	response to drug	107/15700	0.00773849
leaf vs rootⅠ	487	GO:0044435	CC	plastid part	487/15700	0.00773849
leaf vs rootⅠ	162	GO:0009617	BP	response to bacterium	162/15700	0.00798858
leaf vs rootⅠ	7	GO:0044572	BP	[4Fe-4S] cluster assembly	7/15700	0.00886477
leaf vs rootⅠ	194	GO:0009535	CC	chloroplast thylakoid membrane	194/15700	0.00910287
leaf vs rootⅠ	194	GO:0055035	CC	plastid thylakoid membrane	194/15700	0.00910287
leaf vs rootⅠ	91	GO:0015662	MF	ion transmembrane transporter activity, phosphorylative mechanism	91/15700	0.00952305
leaf vs rootⅠ	16	GO:0008802	MF	betaine-aldehyde dehydrogenase activity	16/15700	0.0108563
leaf vs rootⅠ	160	GO:0009141	BP	nucleoside triphosphate metabolic process	160/15700	0.0109942
leaf vs rootⅠ	3304	GO:0044422	CC	organelle part	3304/15700	0.01109
leaf vs rootⅠ	23	GO:0005385	MF	zinc ion transmembrane transporter activity	23/15700	0.0112857
leaf vs rootⅠ	3301	GO:0044446	CC	intracellular organelle part	3301/15700	0.0114905
leaf vs rootⅠ	197	GO:0042651	CC	thylakoid membrane	197/15700	0.0119883
leaf vs rootⅠ	197	GO:0034357	CC	photosynthetic membrane	197/15700	0.0119883
leaf vs rootⅠ	18	GO:0003938	MF	IMP dehydrogenase activity	18/15700	0.0121741
leaf vs rootⅠ	144	GO:0072593	BP	reactive oxygen species metabolic process	144/15700	0.0126711
leaf vs rootⅠ	106	GO:0050801	BP	ion homeostasis	106/15700	0.0127583
leaf vs rootⅠ	74	GO:0072350	BP	tricarboxylic acid metabolic process	74/15700	0.0128707
leaf vs rootⅠ	48	GO:0008097	MF	5S rRNA binding	48/15700	0.0133026
leaf vs rootⅠ	137	GO:0006006	BP	glucose metabolic process	137/15700	0.0135035
leaf vs rootⅠ	11	GO:0048437	BP	floral organ development	11/15700	0.0140447
leaf vs rootⅠ	167	GO:1901615	BP	organic hydroxy compound metabolic process	167/15700	0.0143083
leaf vs rootⅠ	515	GO:0009628	BP	response to abiotic stimulus	515/15700	0.0146045
leaf vs rootⅠ	163	GO:0022853	MF	active ion transmembrane transporter activity	163/15700	0.014863
leaf vs rootⅠ	46	GO:0009611	BP	response to wounding	46/15700	0.0151648
leaf vs rootⅠ	156	GO:0005507	MF	copper ion binding	156/15700	0.0168524
leaf vs rootⅠ	47	GO:0016833	MF	oxo-acid-lyase activity	47/15700	0.0177831
leaf vs rootⅠ	51	GO:0000275	CC	mitochondrial proton-transporting ATP synthase complex, catalytic core F(1)	51/15700	0.0193327
leaf vs rootⅠ	127	GO:0006820	BP	anion transport	127/15700	0.01962
leaf vs rootⅠ	66	GO:0046942	BP	carboxylic acid transport	66/15700	0.0207333
leaf vs rootⅠ	66	GO:0015849	BP	organic acid transport	66/15700	0.0207333
leaf vs rootⅠ	23	GO:0009052	BP	pentose-phosphate shunt, non-oxidative branch	23/15700	0.0210627
leaf vs rootⅠ	646	GO:0019637	BP	organophosphate metabolic process	646/15700	0.0210709
leaf vs rootⅠ	19	GO:2001057	BP	reactive nitrogen species metabolic process	19/15700	0.0210709
leaf vs rootⅠ	19	GO:0042128	BP	nitrate assimilation	19/15700	0.0210709
leaf vs rootⅠ	19	GO:0042126	BP	nitrate metabolic process	19/15700	0.0210709
leaf vs rootⅠ	21	GO:0009450	BP	gamma-aminobutyric acid catabolic process	21/15700	0.0211482
leaf vs rootⅠ	311	GO:0009605	BP	response to external stimulus	311/15700	0.0215148
leaf vs rootⅠ	6	GO:0080110	BP	sporopollenin biosynthetic process	6/15700	0.0215912
leaf vs rootⅠ	298	GO:0006790	BP	sulfur compound metabolic process	298/15700	0.0220355
leaf vs rootⅠ	313	GO:0098805	CC	whole membrane	313/15700	0.0221601
leaf vs rootⅠ	625	GO:0019438	BP	aromatic compound biosynthetic process	625/15700	0.0225157
leaf vs rootⅠ	16	GO:2000022	BP	regulation of jasmonic acid mediated signaling pathway	16/15700	0.0231017
leaf vs rootⅠ	9	GO:0033542	BP	fatty acid beta-oxidation, unsaturated, even number	9/15700	0.023206
leaf vs rootⅠ	9	GO:0080023	MF	3R-hydroxyacyl-CoA dehydratase activity	9/15700	0.023206
leaf vs rootⅠ	75	GO:0035383	BP	thioester metabolic process	75/15700	0.0235239
leaf vs rootⅠ	75	GO:0006637	BP	acyl-CoA metabolic process	75/15700	0.0235239
leaf vs rootⅠ	71	GO:0070469	CC	respirasome	71/15700	0.0238287
leaf vs rootⅠ	18	GO:0004070	MF	aspartate carbamoyltransferase activity	18/15700	0.025217
leaf vs rootⅠ	3447	GO:0044260	BP	cellular macromolecule metabolic process	3447/15700	0.0252286
leaf vs rootⅠ	76	GO:0046677	BP	response to antibiotic	76/15700	0.0253701
leaf vs rootⅠ	600	GO:0005739	CC	mitochondrion	600/15700	0.027472
leaf vs rootⅠ	35	GO:0030515	MF	snoRNA binding	35/15700	0.0304626
leaf vs rootⅠ	30	GO:0006102	BP	isocitrate metabolic process	30/15700	0.031542
leaf vs rootⅠ	7	GO:0019419	BP	sulfate reduction	7/15700	0.0379315
leaf vs rootⅠ	7	GO:0030371	MF	translation repressor activity	7/15700	0.0379315
leaf vs rootⅠ	694	GO:1901362	BP	organic cyclic compound biosynthetic process	694/15700	0.0389208
leaf vs rootⅠ	21	GO:0009013	MF	succinate-semialdehyde dehydrogenase [NAD(P)+] activity	21/15700	0.0400757
leaf vs rootⅠ	203	GO:0004497	MF	monooxygenase activity	203/15700	0.0403334
leaf vs rootⅠ	217	GO:0016209	MF	antioxidant activity	217/15700	0.0407671
leaf vs rootⅠ	79	GO:0015711	BP	organic anion transport	79/15700	0.0411545
leaf vs rootⅠ	37	GO:0009705	CC	plant-type vacuole membrane	37/15700	0.0445278
leaf vs rootⅠ	21	GO:0009448	BP	gamma-aminobutyric acid metabolic process	21/15700	0.0481106
leaf vs rootⅠ	49	GO:0016226	BP	iron-sulfur cluster assembly	49/15700	0.0489558
leaf vs rootⅠ	49	GO:0031163	BP	metallo-sulfur cluster assembly	49/15700	0.0489558
leaf vs rootⅠ	8	GO:0102078	MF	methyl jasmonate methylesterase activity	8/15700	0.0489558
leaf vs rootⅠ	8	GO:0008410	MF	CoA-transferase activity	8/15700	0.0489558
leaf vs rootⅠ	41	GO:0000104	MF	succinate dehydrogenase activity	41/15700	0.0493769
leaf vs rootⅠ	132	GO:0042742	BP	defense response to bacterium	132/15700	0.0504673
leaf vs rootⅠ	1930	GO:0016020	CC	membrane	1930/15700	0.0504673
leaf vs rootⅠ	63	GO:0042558	BP	pteridine-containing compound metabolic process	63/15700	0.0506585
leaf vs rootⅠ	19	GO:0004777	MF	succinate-semialdehyde dehydrogenase (NAD+) activity	19/15700	0.0511521
leaf vs rootⅠ	19	GO:0016743	MF	carboxyl- or carbamoyltransferase activity	19/15700	0.0511521
leaf vs rootⅠ	38	GO:0042542	BP	response to hydrogen peroxide	38/15700	0.0522514
leaf vs rootⅠ	5	GO:0010277	MF	chlorophyllide a oxygenase [overall] activity	5/15700	0.0526521
leaf vs rootⅠ	312	GO:0006457	BP	protein folding	312/15700	0.0529414
leaf vs rootⅠ	232	GO:0051707	BP	response to other organism	232/15700	0.0544417
leaf vs rootⅠ	9	GO:0030795	MF	jasmonate O-methyltransferase activity	9/15700	0.0547601
leaf vs rootⅠ	868	GO:0005886	CC	plasma membrane	868/15700	0.0548538
leaf vs rootⅠ	22	GO:0071941	BP	nitrogen cycle metabolic process	22/15700	0.055921
leaf vs rootⅠ	42	GO:0006334	BP	nucleosome assembly	42/15700	0.0559804
leaf vs rootⅠ	42	GO:0006778	BP	porphyrin-containing compound metabolic process	42/15700	0.0559804
leaf vs rootⅠ	136	GO:1990204	CC	oxidoreductase complex	136/15700	0.0579968
leaf vs rootⅠ	155	GO:0009416	BP	response to light stimulus	155/15700	0.0606215
leaf vs rootⅠ	108	GO:0016831	MF	carboxy-lyase activity	108/15700	0.0606215
leaf vs rootⅠ	52	GO:0000463	BP	maturation of LSU-rRNA from tricistronic rRNA transcript (SSU-rRNA, 5.8S rRNA, LSU-rRNA)	52/15700	0.061575
leaf vs rootⅠ	59	GO:0016668	MF	oxidoreductase activity, acting on a sulfur group of donors, NAD(P) as acceptor	59/15700	0.0620011
leaf vs rootⅠ	248	GO:0009607	BP	response to biotic stimulus	248/15700	0.0627017
leaf vs rootⅠ	16	GO:0004069	MF	L-aspartate:2-oxoglutarate aminotransferase activity	16/15700	0.0627017
leaf vs rootⅠ	16	GO:0043546	MF	molybdopterin cofactor binding	16/15700	0.0627017
leaf vs rootⅠ	91	GO:0004713	MF	protein tyrosine kinase activity	91/15700	0.0631843
leaf vs rootⅠ	14	GO:0010089	BP	xylem development	14/15700	0.0632424
leaf vs rootⅠ	22	GO:1902074	BP	response to salt	22/15700	0.0634408
leaf vs rootⅠ	22	GO:0004499	MF	N,N-dimethylaniline monooxygenase activity	22/15700	0.0634408
leaf vs rootⅠ	87	GO:0016655	MF	oxidoreductase activity, acting on NAD(P)H, quinone or similar compound as acceptor	87/15700	0.066342
leaf vs rootⅠ	121	GO:0051539	MF	4 iron, 4 sulfur cluster binding	121/15700	0.0680444
leaf vs rootⅠ	40	GO:0015301	MF	anion:anion antiporter activity	40/15700	0.0681453
leaf vs rootⅠ	40	GO:0140323	MF	solute:anion antiporter activity	40/15700	0.0681453
leaf vs rootⅠ	50	GO:0009636	BP	response to toxic substance	50/15700	0.0703711
leaf vs rootⅠ	133	GO:0098800	CC	inner mitochondrial membrane protein complex	133/15700	0.0703711
leaf vs rootⅠ	35	GO:1902652	BP	secondary alcohol metabolic process	35/15700	0.0709385
leaf vs rootⅠ	30	GO:0009060	BP	aerobic respiration	30/15700	0.0713075
leaf vs rootⅠ	187	GO:0042737	BP	drug catabolic process	187/15700	0.0716811
leaf vs rootⅠ	23	GO:0009331	CC	glycerol-3-phosphate dehydrogenase complex	23/15700	0.0726971
leaf vs rootⅠ	222	GO:0006364	BP	rRNA processing	222/15700	0.0739346
leaf vs rootⅠ	10	GO:0010214	BP	seed coat development	10/15700	0.0767155
leaf vs rootⅠ	17	GO:0004088	MF	carbamoyl-phosphate synthase (glutamine-hydrolyzing) activity	17/15700	0.0776529
leaf vs rootⅠ	78	GO:0006081	BP	cellular aldehyde metabolic process	78/15700	0.0785797
leaf vs rootⅠ	74	GO:0009521	CC	photosystem	74/15700	0.0793367
leaf vs rootⅠ	96	GO:0016859	MF	cis-trans isomerase activity	96/15700	0.0799387
leaf vs rootⅠ	6	GO:0016987	MF	sigma factor activity	6/15700	0.0805147
leaf vs rootⅠ	6	GO:0102311	MF	8-hydroxygeraniol dehydrogenase activity	6/15700	0.0805147
leaf vs rootⅠ	290	GO:0009506	CC	plasmodesma	290/15700	0.0806704
leaf vs rootⅠ	290	GO:0005911	CC	cell-cell junction	290/15700	0.0806704
leaf vs rootⅠ	290	GO:0030054	CC	cell junction	290/15700	0.0813201
leaf vs rootⅠ	39	GO:0008177	MF	succinate dehydrogenase (ubiquinone) activity	39/15700	0.0814812
leaf vs rootⅠ	224	GO:0016072	BP	rRNA metabolic process	224/15700	0.0858991
leaf vs rootⅠ	232	GO:0043207	BP	response to external biotic stimulus	232/15700	0.087007
leaf vs rootⅠ	124	GO:0051187	BP	cofactor catabolic process	124/15700	0.0878452
leaf vs rootⅠ	94	GO:0006066	BP	alcohol metabolic process	94/15700	0.0896399
leaf vs rootⅠ	17	GO:0015718	BP	monocarboxylic acid transport	17/15700	0.0913863
leaf vs rootⅠ	17	GO:0010207	BP	photosystem II assembly	17/15700	0.0913863
leaf vs rootⅠ	95	GO:0003755	MF	peptidyl-prolyl cis-trans isomerase activity	95/15700	0.0914186
leaf vs rootⅠ	37	GO:0004616	MF	phosphogluconate dehydrogenase (decarboxylating) activity	37/15700	0.093323
leaf vs rootⅠ	7	GO:0017014	BP	protein nitrosylation	7/15700	0.0950955
leaf vs rootⅠ	7	GO:0033484	BP	nitric oxide homeostasis	7/15700	0.0950955
leaf vs rootⅠ	7	GO:0033483	BP	gas homeostasis	7/15700	0.0950955
leaf vs rootⅠ	61	GO:0009522	CC	photosystem I	61/15700	0.0950955
leaf vs rootⅠ	7	GO:0015181	MF	arginine transmembrane transporter activity	7/15700	0.0950955
leaf vs rootⅠ	15	GO:0046168	BP	glycerol-3-phosphate catabolic process	15/15700	0.0960199
leaf vs rootⅠ	15	GO:0004367	MF	glycerol-3-phosphate dehydrogenase [NAD+] activity	15/15700	0.0960199
leaf vs rootⅠ	15	GO:0015179	MF	L-amino acid transmembrane transporter activity	15/15700	0.0960199
leaf vs rootⅠ	35	GO:0004448	MF	isocitrate dehydrogenase activity	35/15700	0.0974703
leaf vs rootⅠ	22	GO:0004791	MF	thioredoxin-disulfide reductase activity	22/15700	0.0991042
leaf vs rootⅠ	13	GO:0034513	MF	box H/ACA snoRNA binding	13/15700	0.0998975
leaf vs rootⅠ	59	GO:0006760	BP	folic acid-containing compound metabolic process	59/15700	0.102128
leaf vs rootⅠ	48	GO:0006085	BP	acetyl-CoA biosynthetic process	48/15700	0.102156
leaf vs rootⅠ	38	GO:0019520	BP	aldonic acid metabolic process	38/15700	0.102291
leaf vs rootⅠ	161	GO:0016684	MF	oxidoreductase activity, acting on peroxide as acceptor	161/15700	0.102871
leaf vs rootⅠ	27	GO:0004033	MF	aldo-keto reductase (NADP) activity	27/15700	0.105374
leaf vs rootⅠ	56	GO:0006084	BP	acetyl-CoA metabolic process	56/15700	0.107646
leaf vs rootⅠ	39	GO:0005315	MF	inorganic phosphate transmembrane transporter activity	39/15700	0.10773
leaf vs rootⅠ	36	GO:0016671	MF	oxidoreductase activity, acting on a sulfur group of donors, disulfide as acceptor	36/15700	0.109735
leaf vs rootⅠ	42	GO:0006635	BP	fatty acid beta-oxidation	42/15700	0.110592
leaf vs rootⅠ	10	GO:1901001	BP	negative regulation of response to salt stress	10/15700	0.111758
leaf vs rootⅠ	68	GO:0006730	BP	one-carbon metabolic process	68/15700	0.112446
leaf vs rootⅠ	22	GO:0031428	CC	box C/D snoRNP complex	22/15700	0.11285
leaf vs rootⅠ	82	GO:0033865	BP	nucleoside bisphosphate metabolic process	82/15700	0.113334
leaf vs rootⅠ	82	GO:0033875	BP	ribonucleoside bisphosphate metabolic process	82/15700	0.113334
leaf vs rootⅠ	82	GO:0034032	BP	purine nucleoside bisphosphate metabolic process	82/15700	0.113334
leaf vs rootⅠ	12	GO:0071540	CC	eukaryotic translation initiation factor 3 complex, eIF3e	12/15700	0.11606
leaf vs rootⅠ	43	GO:0006817	BP	phosphate ion transport	43/15700	0.116307
leaf vs rootⅠ	43	GO:0016635	MF	oxidoreductase activity, acting on the CH-CH group of donors, quinone or related compound as acceptor	43/15700	0.116307
leaf vs rootⅠ	274	GO:0016705	MF	oxidoreductase activity, acting on paired donors, with incorporation or reduction of molecular oxygen	274/15700	0.117506
leaf vs rootⅠ	4	GO:0045038	BP	protein import into chloroplast thylakoid membrane	4/15700	0.118911
leaf vs rootⅠ	4	GO:0051307	BP	meiotic chromosome separation	4/15700	0.118911
leaf vs rootⅠ	4	GO:0034035	BP	purine ribonucleoside bisphosphate metabolic process	4/15700	0.118911
leaf vs rootⅠ	4	GO:0015969	BP	guanosine tetraphosphate metabolic process	4/15700	0.118911
leaf vs rootⅠ	4	GO:0033281	CC	TAT protein transport complex	4/15700	0.118911
leaf vs rootⅠ	4	GO:0008825	MF	cyclopropane-fatty-acyl-phospholipid synthase activity	4/15700	0.118911
leaf vs rootⅠ	242	GO:0005506	MF	iron ion binding	242/15700	0.118911
leaf vs rootⅠ	18	GO:0005853	CC	eukaryotic translation elongation factor 1 complex	18/15700	0.120133
leaf vs rootⅠ	25	GO:0008106	MF	alcohol dehydrogenase (NADP+) activity	25/15700	0.120358
leaf vs rootⅠ	156	GO:0009314	BP	response to radiation	156/15700	0.121639
leaf vs rootⅠ	47	GO:0009119	BP	ribonucleoside metabolic process	47/15700	0.121639
leaf vs rootⅠ	43	GO:0033013	BP	tetrapyrrole metabolic process	43/15700	0.121753
leaf vs rootⅠ	244	GO:0051704	BP	multi-organism process	244/15700	0.122012
leaf vs rootⅠ	37	GO:0019521	BP	D-gluconate metabolic process	37/15700	0.122822
leaf vs rootⅠ	62	GO:0009523	CC	photosystem II	62/15700	0.123355
leaf vs rootⅠ	58	GO:0018298	BP	protein-chromophore linkage	58/15700	0.123384
leaf vs rootⅠ	9	GO:0048825	BP	cotyledon development	9/15700	0.125899
leaf vs rootⅠ	9	GO:0045282	CC	plasma membrane succinate dehydrogenase complex	9/15700	0.125899
leaf vs rootⅠ	9	GO:0015189	MF	L-lysine transmembrane transporter activity	9/15700	0.125899
leaf vs rootⅠ	159	GO:0044272	BP	sulfur compound biosynthetic process	159/15700	0.127369
leaf vs rootⅠ	19	GO:0046037	BP	GMP metabolic process	19/15700	0.137141
leaf vs rootⅠ	19	GO:0006177	BP	GMP biosynthetic process	19/15700	0.137141
leaf vs rootⅠ	19	GO:0047484	BP	regulation of response to osmotic stress	19/15700	0.137141
leaf vs rootⅠ	19	GO:1901000	BP	regulation of response to salt stress	19/15700	0.137141
leaf vs rootⅠ	238	GO:0015291	MF	secondary active transmembrane transporter activity	238/15700	0.138067
leaf vs rootⅠ	45	GO:0006865	BP	amino acid transport	45/15700	0.138145
leaf vs rootⅠ	137	GO:0016765	MF	transferase activity, transferring alkyl or aryl (other than methyl) groups	137/15700	0.138197
leaf vs rootⅠ	41	GO:0006885	BP	regulation of pH	41/15700	0.13891
leaf vs rootⅠ	11	GO:0009298	BP	GDP-mannose biosynthetic process	11/15700	0.139977
leaf vs rootⅠ	32	GO:0043891	MF	glyceraldehyde-3-phosphate dehydrogenase (NAD(P)+) (phosphorylating) activity	32/15700	0.140151
leaf vs rootⅠ	32	GO:0004365	MF	glyceraldehyde-3-phosphate dehydrogenase (NAD+) (phosphorylating) activity	32/15700	0.140151
leaf vs rootⅠ	29	GO:0005471	MF	ATP:ADP antiporter activity	29/15700	0.141136
leaf vs rootⅠ	14	GO:0001731	BP	formation of translation preinitiation complex	14/15700	0.14219
leaf vs rootⅠ	14	GO:0030497	BP	fatty acid elongation	14/15700	0.14219
leaf vs rootⅠ	24	GO:0052646	BP	alditol phosphate metabolic process	24/15700	0.143131
leaf vs rootⅠ	24	GO:0006072	BP	glycerol-3-phosphate metabolic process	24/15700	0.143131
leaf vs rootⅠ	24	GO:0005854	CC	nascent polypeptide-associated complex	24/15700	0.143131
leaf vs rootⅠ	99	GO:0031625	MF	ubiquitin protein ligase binding	99/15700	0.143131
leaf vs rootⅠ	17	GO:1903409	BP	reactive oxygen species biosynthetic process	17/15700	0.145646
leaf vs rootⅠ	17	GO:0008028	MF	monocarboxylic acid transmembrane transporter activity	17/15700	0.145646
leaf vs rootⅠ	46	GO:0046128	BP	purine ribonucleoside metabolic process	46/15700	0.146048
leaf vs rootⅠ	111	GO:0042744	BP	hydrogen peroxide catabolic process	111/15700	0.146245
leaf vs rootⅠ	27	GO:0006020	BP	inositol metabolic process	27/15700	0.148228
leaf vs rootⅠ	33	GO:1901068	BP	guanosine-containing compound metabolic process	33/15700	0.148566
leaf vs rootⅠ	50	GO:0035384	BP	thioester biosynthetic process	50/15700	0.148825
leaf vs rootⅠ	50	GO:0071616	BP	acyl-CoA biosynthetic process	50/15700	0.148825
leaf vs rootⅠ	42	GO:0009062	BP	fatty acid catabolic process	42/15700	0.148904
leaf vs rootⅠ	42	GO:0019395	BP	fatty acid oxidation	42/15700	0.148904
leaf vs rootⅠ	971	GO:0006950	BP	response to stress	971/15700	0.149044
leaf vs rootⅠ	8	GO:0010023	BP	proanthocyanidin biosynthetic process	8/15700	0.152371
leaf vs rootⅠ	8	GO:0036456	MF	L-methionine-(S)-S-oxide reductase activity	8/15700	0.152371
leaf vs rootⅠ	8	GO:0008957	MF	phenylacetaldehyde dehydrogenase activity	8/15700	0.152371
leaf vs rootⅠ	8	GO:0033744	MF	L-methionine:thioredoxin-disulfide S-oxidoreductase activity	8/15700	0.152371
leaf vs rootⅠ	62	GO:0000302	BP	response to reactive oxygen species	62/15700	0.152536
leaf vs rootⅠ	15	GO:0044571	BP	[2Fe-2S] cluster assembly	15/15700	0.158002
leaf vs rootⅠ	5	GO:0010598	CC	NAD(P)H dehydrogenase complex (plastoquinone)	5/15700	0.158777
leaf vs rootⅠ	5	GO:0015204	MF	urea transmembrane transporter activity	5/15700	0.158777
leaf vs rootⅠ	5	GO:0000170	MF	sphingosine hydroxylase activity	5/15700	0.158777
leaf vs rootⅠ	5	GO:0000293	MF	ferric-chelate reductase activity	5/15700	0.158777
leaf vs rootⅠ	5	GO:0016723	MF	oxidoreductase activity, oxidizing metal ions, NAD or NADP as acceptor	5/15700	0.158777
leaf vs rootⅠ	5	GO:0004604	MF	phosphoadenylyl-sulfate reductase (thioredoxin) activity	5/15700	0.158777
leaf vs rootⅠ	5	GO:0047746	MF	chlorophyllase activity	5/15700	0.158777
leaf vs rootⅠ	40	GO:0005732	CC	small nucleolar ribonucleoprotein complex	40/15700	0.160858
leaf vs rootⅠ	55	GO:0016168	MF	chlorophyll binding	55/15700	0.166103
leaf vs rootⅠ	334	GO:0022804	MF	active transmembrane transporter activity	334/15700	0.167836
leaf vs rootⅠ	13	GO:1902626	BP	assembly of large subunit precursor of preribosome	13/15700	0.169478
leaf vs rootⅠ	13	GO:0019646	BP	aerobic electron transport chain	13/15700	0.169478
leaf vs rootⅠ	6	GO:0051291	BP	protein heterooligomerization	6/15700	0.176071
leaf vs rootⅠ	6	GO:0015812	BP	gamma-aminobutyric acid transport	6/15700	0.176071
leaf vs rootⅠ	6	GO:0022858	MF	alanine transmembrane transporter activity	6/15700	0.176071
leaf vs rootⅠ	6	GO:0015128	MF	gluconate transmembrane transporter activity	6/15700	0.176071
leaf vs rootⅠ	6	GO:0015185	MF	gamma-aminobutyric acid transmembrane transporter activity	6/15700	0.176071
leaf vs rootⅠ	6	GO:0015180	MF	L-alanine transmembrane transporter activity	6/15700	0.176071
leaf vs rootⅠ	6	GO:0010279	MF	indole-3-acetic acid amido synthetase activity	6/15700	0.176071
leaf vs rootⅠ	6	GO:0015175	MF	neutral amino acid transmembrane transporter activity	6/15700	0.176071
leaf vs rootⅠ	90	GO:0008514	MF	organic anion transmembrane transporter activity	90/15700	0.176446
leaf vs rootⅠ	11	GO:0009640	BP	photomorphogenesis	11/15700	0.179188
leaf vs rootⅠ	31	GO:0004715	MF	non-membrane spanning protein tyrosine kinase activity	31/15700	0.181334
leaf vs rootⅠ	101	GO:0044389	MF	ubiquitin-like protein ligase binding	101/15700	0.181611
leaf vs rootⅠ	9	GO:0006123	BP	mitochondrial electron transport, cytochrome c to oxygen	9/15700	0.183461
leaf vs rootⅠ	9	GO:0000454	BP	snoRNA guided rRNA pseudouridine synthesis	9/15700	0.183461
leaf vs rootⅠ	9	GO:0000979	MF	RNA polymerase II core promoter sequence-specific DNA binding	9/15700	0.183461
leaf vs rootⅠ	9	GO:0004476	MF	mannose-6-phosphate isomerase activity	9/15700	0.183461
leaf vs rootⅠ	9	GO:0001047	MF	core promoter binding	9/15700	0.183461
leaf vs rootⅠ	9	GO:0001046	MF	core promoter sequence-specific DNA binding	9/15700	0.183461
leaf vs rootⅠ	9	GO:0045485	MF	omega-6 fatty acid desaturase activity	9/15700	0.183461
leaf vs rootⅠ	28	GO:0006449	BP	regulation of translational termination	28/15700	0.184019
leaf vs rootⅠ	50	GO:0009765	BP	photosynthesis, light harvesting	50/15700	0.192748
leaf vs rootⅠ	68	GO:0046364	BP	monosaccharide biosynthetic process	68/15700	0.197138
leaf vs rootⅠ	59	GO:0046943	MF	carboxylic acid transmembrane transporter activity	59/15700	0.19764
leaf vs rootⅠ	59	GO:0005342	MF	organic acid transmembrane transporter activity	59/15700	0.19764
leaf vs rootⅠ	39	GO:0042803	MF	protein homodimerization activity	39/15700	0.198719
leaf vs rootⅠ	112	GO:0042743	BP	hydrogen peroxide metabolic process	112/15700	0.199159
leaf vs rootⅠ	43	GO:0048588	BP	developmental cell growth	43/15700	0.202615
leaf vs rootⅠ	8	GO:0009704	BP	de-etiolation	8/15700	0.205409
leaf vs rootⅠ	8	GO:0009943	BP	adaxial/abaxial axis specification	8/15700	0.205409
leaf vs rootⅠ	8	GO:0046189	BP	phenol-containing compound biosynthetic process	8/15700	0.205409
leaf vs rootⅠ	8	GO:0006540	BP	glutamate decarboxylation to succinate	8/15700	0.205409
leaf vs rootⅠ	8	GO:0006836	BP	neurotransmitter transport	8/15700	0.205409
leaf vs rootⅠ	8	GO:0005313	MF	L-glutamate transmembrane transporter activity	8/15700	0.205409
leaf vs rootⅠ	8	GO:0015172	MF	acidic amino acid transmembrane transporter activity	8/15700	0.205409
leaf vs rootⅠ	18	GO:0043878	MF	glyceraldehyde-3-phosphate dehydrogenase (NAD+) (non-phosphorylating) activity	18/15700	0.207151
leaf vs rootⅠ	30	GO:0015217	MF	ADP transmembrane transporter activity	30/15700	0.208069
leaf vs rootⅠ	148	GO:0004601	MF	peroxidase activity	148/15700	0.208199
leaf vs rootⅠ	10	GO:0034663	CC	endoplasmic reticulum chaperone complex	10/15700	0.208329
leaf vs rootⅠ	4818	GO:0006807	BP	nitrogen compound metabolic process	4818/15700	0.211128
leaf vs rootⅠ	27	GO:0006452	BP	translational frameshifting	27/15700	0.21232
leaf vs rootⅠ	27	GO:0045905	BP	positive regulation of translational termination	27/15700	0.21232
leaf vs rootⅠ	27	GO:0045901	BP	positive regulation of translational elongation	27/15700	0.21232
leaf vs rootⅠ	33	GO:1990748	BP	cellular detoxification	33/15700	0.213798
leaf vs rootⅠ	57	GO:0031667	BP	response to nutrient levels	57/15700	0.218371
leaf vs rootⅠ	19	GO:0005310	MF	dicarboxylic acid transmembrane transporter activity	19/15700	0.219006
leaf vs rootⅠ	166	GO:0000287	MF	magnesium ion binding	166/15700	0.220062
leaf vs rootⅠ	34	GO:0045333	BP	cellular respiration	34/15700	0.221689
leaf vs rootⅠ	67	GO:0046912	MF	transferase activity, transferring acyl groups, acyl groups converted into alkyl on transfer	67/15700	0.226461
leaf vs rootⅠ	22	GO:0051903	MF	S-(hydroxymethyl)glutathione dehydrogenase activity	22/15700	0.228553
leaf vs rootⅠ	31	GO:0005347	MF	ATP transmembrane transporter activity	31/15700	0.23141
leaf vs rootⅠ	42	GO:0055067	BP	monovalent inorganic cation homeostasis	42/15700	0.233393
leaf vs rootⅠ	46	GO:0042278	BP	purine nucleoside metabolic process	46/15700	0.233714
leaf vs rootⅠ	59	GO:0009991	BP	response to extracellular stimulus	59/15700	0.242787
leaf vs rootⅠ	10961	GO:0005575	CC	cellular_component	10961/15700	0.244213
leaf vs rootⅠ	42	GO:0046129	BP	purine ribonucleoside biosynthetic process	42/15700	0.244523
leaf vs rootⅠ	42	GO:0042451	BP	purine nucleoside biosynthetic process	42/15700	0.244523
leaf vs rootⅠ	42	GO:0042455	BP	ribonucleoside biosynthetic process	42/15700	0.244523
leaf vs rootⅠ	42	GO:0009163	BP	nucleoside biosynthetic process	42/15700	0.244523
leaf vs rootⅠ	19	GO:0006556	BP	S-adenosylmethionine biosynthetic process	19/15700	0.245283
leaf vs rootⅠ	7	GO:0072321	BP	chaperone-mediated protein transport	7/15700	0.245283
leaf vs rootⅠ	7	GO:0042372	BP	phylloquinone biosynthetic process	7/15700	0.245283
leaf vs rootⅠ	7	GO:0042374	BP	phylloquinone metabolic process	7/15700	0.245283
leaf vs rootⅠ	7	GO:0009368	CC	endopeptidase Clp complex	7/15700	0.245283
leaf vs rootⅠ	12	GO:0009566	BP	fertilization	12/15700	0.2453
leaf vs rootⅠ	25	GO:0043649	BP	dicarboxylic acid catabolic process	25/15700	0.2453
leaf vs rootⅠ	12	GO:0016656	MF	monodehydroascorbate reductase (NADH) activity	12/15700	0.2453
leaf vs rootⅠ	137	GO:0008509	MF	anion transmembrane transporter activity	137/15700	0.246353
leaf vs rootⅠ	47	GO:0034440	BP	lipid oxidation	47/15700	0.247344
leaf vs rootⅠ	17	GO:0016229	MF	steroid dehydrogenase activity	17/15700	0.247344
leaf vs rootⅠ	15	GO:0019427	BP	acetyl-CoA biosynthetic process from acetate	15/15700	0.253227
leaf vs rootⅠ	15	GO:0006083	BP	acetate metabolic process	15/15700	0.253227
leaf vs rootⅠ	3	GO:0060263	BP	regulation of respiratory burst	3/15700	0.2538
leaf vs rootⅠ	3	GO:0060267	BP	positive regulation of respiratory burst	3/15700	0.2538
leaf vs rootⅠ	3	GO:0007349	BP	cellularization	3/15700	0.2538
leaf vs rootⅠ	3	GO:0009558	BP	embryo sac cellularization	3/15700	0.2538
leaf vs rootⅠ	3	GO:0007112	BP	male meiosis cytokinesis	3/15700	0.2538
leaf vs rootⅠ	3	GO:0072351	BP	tricarboxylic acid biosynthetic process	3/15700	0.2538
leaf vs rootⅠ	3	GO:0016123	BP	xanthophyll biosynthetic process	3/15700	0.2538
leaf vs rootⅠ	3	GO:0030417	BP	nicotianamine metabolic process	3/15700	0.2538
leaf vs rootⅠ	3	GO:0030418	BP	nicotianamine biosynthetic process	3/15700	0.2538
leaf vs rootⅠ	3	GO:0061687	BP	detoxification of inorganic compound	3/15700	0.2538
leaf vs rootⅠ	3	GO:0090379	BP	secondary cell wall biogenesis involved in seed trichome differentiation	3/15700	0.2538
leaf vs rootⅠ	3	GO:0045962	BP	positive regulation of development, heterochronic	3/15700	0.2538
leaf vs rootⅠ	3	GO:0071585	BP	detoxification of cadmium ion	3/15700	0.2538
leaf vs rootⅠ	3	GO:0033206	BP	meiotic cytokinesis	3/15700	0.2538
leaf vs rootⅠ	26	GO:0016408	MF	C-acyltransferase activity	26/15700	0.2538
leaf vs rootⅠ	3	GO:0004043	MF	L-aminoadipate-semialdehyde dehydrogenase activity	3/15700	0.2538
leaf vs rootⅠ	3	GO:0070401	MF	NADP+ binding	3/15700	0.2538
leaf vs rootⅠ	3	GO:0047655	MF	allyl-alcohol dehydrogenase activity	3/15700	0.2538
leaf vs rootⅠ	3	GO:0030410	MF	nicotianamine synthase activity	3/15700	0.2538
leaf vs rootⅠ	3	GO:0004655	MF	porphobilinogen synthase activity	3/15700	0.2538
leaf vs rootⅠ	3	GO:0008920	MF	lipopolysaccharide heptosyltransferase activity	3/15700	0.2538
leaf vs rootⅠ	3	GO:0032441	MF	pheophorbide a oxygenase activity	3/15700	0.2538
leaf vs rootⅠ	3	GO:0009977	MF	proton motive force dependent protein transmembrane transporter activity	3/15700	0.2538
leaf vs rootⅠ	3	GO:0047209	MF	coniferyl-alcohol glucosyltransferase activity	3/15700	0.2538
leaf vs rootⅠ	23	GO:0003995	MF	acyl-CoA dehydrogenase activity	23/15700	0.255038
leaf vs rootⅠ	29	GO:0016742	MF	hydroxymethyl-, formyl- and related transferase activity	29/15700	0.258525
leaf vs rootⅠ	62	GO:0015295	MF	solute:proton symporter activity	62/15700	0.259705
leaf vs rootⅠ	10	GO:0009773	BP	photosynthetic electron transport in photosystem I	10/15700	0.261569
leaf vs rootⅠ	10	GO:0004024	MF	alcohol dehydrogenase activity, zinc-dependent	10/15700	0.261569
leaf vs rootⅠ	10	GO:0003960	MF	NADPH:quinone reductase activity	10/15700	0.261569
leaf vs rootⅠ	10	GO:0004019	MF	adenylosuccinate synthase activity	10/15700	0.261569
leaf vs rootⅠ	612	GO:0009536	CC	plastid	612/15700	0.263996
leaf vs rootⅠ	26	GO:0043023	MF	ribosomal large subunit binding	26/15700	0.265753
leaf vs rootⅠ	13	GO:0019673	BP	GDP-mannose metabolic process	13/15700	0.267681
leaf vs rootⅠ	30	GO:0006779	BP	porphyrin-containing compound biosynthetic process	30/15700	0.268677
leaf vs rootⅠ	15	GO:0016208	MF	AMP binding	15/15700	0.270867
leaf vs rootⅠ	45	GO:0006101	BP	citrate metabolic process	45/15700	0.270967
leaf vs rootⅠ	45	GO:0006986	BP	response to unfolded protein	45/15700	0.270967
leaf vs rootⅠ	45	GO:0034620	BP	cellular response to unfolded protein	45/15700	0.270967
leaf vs rootⅠ	91	GO:0000786	CC	nucleosome	91/15700	0.271571
leaf vs rootⅠ	41	GO:0042594	BP	response to starvation	41/15700	0.272643
leaf vs rootⅠ	64	GO:0004364	MF	glutathione transferase activity	64/15700	0.272832
leaf vs rootⅠ	20	GO:0051538	MF	3 iron, 4 sulfur cluster binding	20/15700	0.275178
leaf vs rootⅠ	64	GO:0006094	BP	gluconeogenesis	64/15700	0.27819
leaf vs rootⅠ	64	GO:0019319	BP	hexose biosynthetic process	64/15700	0.27819
leaf vs rootⅠ	30	GO:0032440	MF	2-alkenal reductase [NAD(P)] activity	30/15700	0.28132
leaf vs rootⅠ	18	GO:0004427	MF	inorganic diphosphatase activity	18/15700	0.286311
leaf vs rootⅠ	24	GO:0015994	BP	chlorophyll metabolic process	24/15700	0.286647
leaf vs rootⅡ	24	GO:0010336	BP	gibberellic acid homeostasis	24/15033	0.000314077
leaf vs rootⅡ	57	GO:0009809	BP	lignin biosynthetic process	57/15033	0.000314077
leaf vs rootⅡ	74	GO:0009699	BP	phenylpropanoid biosynthetic process	74/15033	0.000314077
leaf vs rootⅡ	54	GO:0009694	BP	jasmonic acid metabolic process	54/15033	0.000314077
leaf vs rootⅡ	50	GO:0009695	BP	jasmonic acid biosynthetic process	50/15033	0.000314077
leaf vs rootⅡ	94	GO:0044550	BP	secondary metabolite biosynthetic process	94/15033	0.000314077
leaf vs rootⅡ	71	GO:0042273	BP	ribosomal large subunit biogenesis	71/15033	0.000314077
leaf vs rootⅡ	101	GO:0000028	BP	ribosomal small subunit assembly	101/15033	0.000314077
leaf vs rootⅡ	48	GO:0031408	BP	oxylipin biosynthetic process	48/15033	0.000314077
leaf vs rootⅡ	48	GO:0031407	BP	oxylipin metabolic process	48/15033	0.000314077
leaf vs rootⅡ	43	GO:0055088	BP	lipid homeostasis	43/15033	0.000314077
leaf vs rootⅡ	149	GO:0000027	BP	ribosomal large subunit assembly	149/15033	0.000314077
leaf vs rootⅡ	117	GO:0072329	BP	monocarboxylic acid catabolic process	117/15033	0.000314077
leaf vs rootⅡ	67	GO:0009808	BP	lignin metabolic process	67/15033	0.000314077
leaf vs rootⅡ	126	GO:0042254	BP	ribosome biogenesis	126/15033	0.000314077
leaf vs rootⅡ	153	GO:0006633	BP	fatty acid biosynthetic process	153/15033	0.000314077
leaf vs rootⅡ	158	GO:0002181	BP	cytoplasmic translation	158/15033	0.000314077
leaf vs rootⅡ	86	GO:0009698	BP	phenylpropanoid metabolic process	86/15033	0.000314077
leaf vs rootⅡ	194	GO:0072330	BP	monocarboxylic acid biosynthetic process	194/15033	0.000314077
leaf vs rootⅡ	217	GO:0006099	BP	tricarboxylic acid cycle	217/15033	0.000314077
leaf vs rootⅡ	158	GO:0006414	BP	translational elongation	158/15033	0.000314077
leaf vs rootⅡ	205	GO:0022613	BP	ribonucleoprotein complex biogenesis	205/15033	0.000314077
leaf vs rootⅡ	212	GO:0006631	BP	fatty acid metabolic process	212/15033	0.000314077
leaf vs rootⅡ	103	GO:0001732	BP	formation of cytoplasmic translation initiation complex	103/15033	0.000314077
leaf vs rootⅡ	264	GO:0098655	BP	cation transmembrane transport	264/15033	0.000314077
leaf vs rootⅡ	242	GO:1902600	BP	proton transmembrane transport	242/15033	0.000314077
leaf vs rootⅡ	245	GO:0016999	BP	antibiotic metabolic process	245/15033	0.000314077
leaf vs rootⅡ	256	GO:0015672	BP	monovalent inorganic cation transport	256/15033	0.000314077
leaf vs rootⅡ	404	GO:0022618	BP	ribonucleoprotein complex assembly	404/15033	0.000314077
leaf vs rootⅡ	471	GO:0055114	BP	oxidation-reduction process	471/15033	0.000314077
leaf vs rootⅡ	406	GO:0071826	BP	ribonucleoprotein complex subunit organization	406/15033	0.000314077
leaf vs rootⅡ	259	GO:0098662	BP	inorganic cation transmembrane transport	259/15033	0.000314077
leaf vs rootⅡ	443	GO:0051186	BP	cofactor metabolic process	443/15033	0.000314077
leaf vs rootⅡ	542	GO:0032787	BP	monocarboxylic acid metabolic process	542/15033	0.000314077
leaf vs rootⅡ	186	GO:0016054	BP	organic acid catabolic process	186/15033	0.000314077
leaf vs rootⅡ	186	GO:0046395	BP	carboxylic acid catabolic process	186/15033	0.000314077
leaf vs rootⅡ	415	GO:0006091	BP	generation of precursor metabolites and energy	415/15033	0.000314077
leaf vs rootⅡ	574	GO:0006629	BP	lipid metabolic process	574/15033	0.000314077
leaf vs rootⅡ	564	GO:0017144	BP	drug metabolic process	564/15033	0.000314077
leaf vs rootⅡ	536	GO:0065003	BP	protein-containing complex assembly	536/15033	0.000314077
leaf vs rootⅡ	236	GO:0044085	BP	cellular component biogenesis	236/15033	0.000314077
leaf vs rootⅡ	70	GO:0140115	BP	export across plasma membrane	70/15033	0.000314077
leaf vs rootⅡ	70	GO:0120029	BP	proton export across plasma membrane	70/15033	0.000314077
leaf vs rootⅡ	578	GO:0043933	BP	protein-containing complex subunit organization	578/15033	0.000314077
leaf vs rootⅡ	66	GO:0031970	CC	organelle envelope lumen	66/15033	0.000314077
leaf vs rootⅡ	65	GO:0005758	CC	mitochondrial intermembrane space	65/15033	0.000314077
leaf vs rootⅡ	135	GO:0042788	CC	polysomal ribosome	135/15033	0.000314077
leaf vs rootⅡ	63	GO:0009514	CC	glyoxysome	63/15033	0.000314077
leaf vs rootⅡ	141	GO:0022626	CC	cytosolic ribosome	141/15033	0.000314077
leaf vs rootⅡ	188	GO:0031974	CC	membrane-enclosed lumen	188/15033	0.000314077
leaf vs rootⅡ	188	GO:0070013	CC	intracellular organelle lumen	188/15033	0.000314077
leaf vs rootⅡ	188	GO:0043233	CC	organelle lumen	188/15033	0.000314077
leaf vs rootⅡ	205	GO:0042579	CC	microbody	205/15033	0.000314077
leaf vs rootⅡ	196	GO:0005777	CC	peroxisome	196/15033	0.000314077
leaf vs rootⅡ	217	GO:0031966	CC	mitochondrial membrane	217/15033	0.000314077
leaf vs rootⅡ	179	GO:0005743	CC	mitochondrial inner membrane	179/15033	0.000314077
leaf vs rootⅡ	190	GO:0019866	CC	organelle inner membrane	190/15033	0.000314077
leaf vs rootⅡ	427	GO:0022627	CC	cytosolic small ribosomal subunit	427/15033	0.000314077
leaf vs rootⅡ	573	GO:0015935	CC	small ribosomal subunit	573/15033	0.000314077
leaf vs rootⅡ	578	GO:0022625	CC	cytosolic large ribosomal subunit	578/15033	0.000314077
leaf vs rootⅡ	250	GO:0005774	CC	vacuolar membrane	250/15033	0.000314077
leaf vs rootⅡ	238	GO:0044436	CC	thylakoid part	238/15033	0.000314077
leaf vs rootⅡ	492	GO:0044429	CC	mitochondrial part	492/15033	0.000314077
leaf vs rootⅡ	686	GO:0015934	CC	large ribosomal subunit	686/15033	0.000314077
leaf vs rootⅡ	48	GO:0052747	MF	sinapyl alcohol dehydrogenase activity	48/15033	0.000314077
leaf vs rootⅡ	73	GO:0045551	MF	cinnamyl-alcohol dehydrogenase activity	73/15033	0.000314077
leaf vs rootⅡ	42	GO:0016629	MF	12-oxophytodienoate reductase activity	42/15033	0.000314077
leaf vs rootⅡ	43	GO:0102132	MF	3-oxo-pimeloyl-[acp] methyl ester reductase activity	43/15033	0.000314077
leaf vs rootⅡ	43	GO:0102131	MF	3-oxo-glutaryl-[acp] methyl ester reductase activity	43/15033	0.000314077
leaf vs rootⅡ	30	GO:0004150	MF	dihydroneopterin aldolase activity	30/15033	0.000314077
leaf vs rootⅡ	67	GO:0004312	MF	fatty acid synthase activity	67/15033	0.000314077
leaf vs rootⅡ	40	GO:0004022	MF	alcohol dehydrogenase (NAD) activity	40/15033	0.000314077
leaf vs rootⅡ	77	GO:0051537	MF	2 iron, 2 sulfur cluster binding	77/15033	0.000314077
leaf vs rootⅡ	64	GO:0016717	MF	oxidoreductase activity, acting on paired donors, with oxidation of a pair of donors resulting in the reduction of molecular oxygen to two molecules of water	64/15033	0.000314077
leaf vs rootⅡ	59	GO:0016832	MF	aldehyde-lyase activity	59/15033	0.000314077
leaf vs rootⅡ	59	GO:0004316	MF	3-oxoacyl-[acyl-carrier-protein] reductase (NADPH) activity	59/15033	0.000314077
leaf vs rootⅡ	17	GO:0046029	MF	mannitol dehydrogenase activity	17/15033	0.000314077
leaf vs rootⅡ	17	GO:0031320	MF	hexitol dehydrogenase activity	17/15033	0.000314077
leaf vs rootⅡ	95	GO:0016628	MF	oxidoreductase activity, acting on the CH-CH group of donors, NAD or NADP as acceptor	95/15033	0.000314077
leaf vs rootⅡ	210	GO:0016627	MF	oxidoreductase activity, acting on the CH-CH group of donors	210/15033	0.000314077
leaf vs rootⅡ	140	GO:0010181	MF	FMN binding	140/15033	0.000314077
leaf vs rootⅡ	183	GO:0050661	MF	NADP binding	183/15033	0.000314077
leaf vs rootⅡ	198	GO:0016667	MF	oxidoreductase activity, acting on a sulfur group of donors	198/15033	0.000314077
leaf vs rootⅡ	217	GO:0016830	MF	carbon-carbon lyase activity	217/15033	0.000314077
leaf vs rootⅡ	242	GO:0009055	MF	electron transfer activity	242/15033	0.000314077
leaf vs rootⅡ	263	GO:0003746	MF	translation elongation factor activity	263/15033	0.000314077
leaf vs rootⅡ	225	GO:0016651	MF	oxidoreductase activity, acting on NAD(P)H	225/15033	0.000314077
leaf vs rootⅡ	289	GO:0019843	MF	rRNA binding	289/15033	0.000314077
leaf vs rootⅡ	259	GO:0051287	MF	NAD binding	259/15033	0.000314077
leaf vs rootⅡ	223	GO:0019829	MF	ATPase-coupled cation transmembrane transporter activity	223/15033	0.000314077
leaf vs rootⅡ	244	GO:0003729	MF	mRNA binding	244/15033	0.000314077
leaf vs rootⅡ	227	GO:0050660	MF	flavin adenine dinucleotide binding	227/15033	0.000314077
leaf vs rootⅡ	48	GO:0016661	MF	oxidoreductase activity, acting on other nitrogenous compounds as donors	48/15033	0.000314077
leaf vs rootⅡ	13	GO:0047681	MF	aryl-alcohol dehydrogenase (NADP+) activity	13/15033	0.000314077
leaf vs rootⅡ	13	GO:0008812	MF	choline dehydrogenase activity	13/15033	0.000314077
leaf vs rootⅡ	509	GO:0008135	MF	translation factor activity, RNA binding	509/15033	0.000314077
leaf vs rootⅡ	428	GO:0046906	MF	tetrapyrrole binding	428/15033	0.000314077
leaf vs rootⅡ	227	GO:0042625	MF	ATPase-coupled ion transmembrane transporter activity	227/15033	0.000314077
leaf vs rootⅡ	534	GO:0016616	MF	oxidoreductase activity, acting on the CH-OH group of donors, NAD or NADP as acceptor	534/15033	0.000314077
leaf vs rootⅡ	318	GO:0016903	MF	oxidoreductase activity, acting on the aldehyde or oxo group of donors	318/15033	0.000314077
leaf vs rootⅡ	510	GO:0090079	MF	translation regulator activity, nucleic acid binding	510/15033	0.000314077
leaf vs rootⅡ	510	GO:0045182	MF	translation regulator activity	510/15033	0.000314077
leaf vs rootⅡ	583	GO:0016614	MF	oxidoreductase activity, acting on CH-OH group of donors	583/15033	0.000314077
leaf vs rootⅡ	338	GO:0015078	MF	proton transmembrane transporter activity	338/15033	0.000314077
leaf vs rootⅡ	372	GO:0020037	MF	heme binding	372/15033	0.000314077
leaf vs rootⅡ	516	GO:0034622	BP	cellular protein-containing complex assembly	516/15033	0.00031494
leaf vs rootⅡ	231	GO:0009152	BP	purine ribonucleotide biosynthetic process	231/15033	0.00031494
leaf vs rootⅡ	268	GO:0098660	BP	inorganic ion transmembrane transport	268/15033	0.000315806
leaf vs rootⅡ	608	GO:0022607	BP	cellular component assembly	608/15033	0.000315806
leaf vs rootⅡ	359	GO:0009150	BP	purine ribonucleotide metabolic process	359/15033	0.000315806
leaf vs rootⅡ	298	GO:0034220	BP	ion transmembrane transport	298/15033	0.000315806
leaf vs rootⅡ	554	GO:0065008	BP	regulation of biological quality	554/15033	0.000315806
leaf vs rootⅡ	268	GO:0003743	MF	translation initiation factor activity	268/15033	0.000315806
leaf vs rootⅡ	287	GO:0016620	MF	oxidoreductase activity, acting on the aldehyde or oxo group of donors, NAD or NADP as acceptor	287/15033	0.000315806
leaf vs rootⅡ	364	GO:0015077	MF	monovalent inorganic cation transmembrane transporter activity	364/15033	0.000315806
leaf vs rootⅡ	888	GO:0050662	MF	coenzyme binding	888/15033	0.000315806
leaf vs rootⅡ	36	GO:0003959	MF	NADPH dehydrogenase activity	36/15033	0.000315806
leaf vs rootⅡ	36	GO:0018548	MF	pentaerythritol trinitrate reductase activity	36/15033	0.000315806
leaf vs rootⅡ	36	GO:0052690	MF	trichloro-p-hydroquinone reductive dehalogenase activity	36/15033	0.000315806
leaf vs rootⅡ	186	GO:0045454	BP	cell redox homeostasis	186/15033	0.000338636
leaf vs rootⅡ	363	GO:0006163	BP	purine nucleotide metabolic process	363/15033	0.000343551
leaf vs rootⅡ	1259	GO:0044391	CC	ribosomal subunit	1259/15033	0.000346006
leaf vs rootⅡ	1083	GO:0044445	CC	cytosolic part	1083/15033	0.000346006
leaf vs rootⅡ	1123	GO:0019752	BP	carboxylic acid metabolic process	1123/15033	0.000347774
leaf vs rootⅡ	1163	GO:0006082	BP	organic acid metabolic process	1163/15033	0.000347774
leaf vs rootⅡ	1157	GO:0043436	BP	oxoacid metabolic process	1157/15033	0.000363537
leaf vs rootⅡ	1506	GO:0048037	MF	cofactor binding	1506/15033	0.000368608
leaf vs rootⅡ	197	GO:0046686	BP	response to cadmium ion	197/15033	0.000396045
leaf vs rootⅡ	2107	GO:0006518	BP	peptide metabolic process	2107/15033	0.000396694
leaf vs rootⅡ	166	GO:0017001	BP	antibiotic catabolic process	166/15033	0.000396694
leaf vs rootⅡ	2073	GO:0006412	BP	translation	2073/15033	0.000396694
leaf vs rootⅡ	2147	GO:0043604	BP	amide biosynthetic process	2147/15033	0.000396694
leaf vs rootⅡ	2025	GO:0005840	CC	ribosome	2025/15033	0.000396694
leaf vs rootⅡ	2179	GO:0003735	MF	structural constituent of ribosome	2179/15033	0.000396694
leaf vs rootⅡ	387	GO:0072521	BP	purine-containing compound metabolic process	387/15033	0.000397399
leaf vs rootⅡ	2076	GO:0043043	BP	peptide biosynthetic process	2076/15033	0.000398065
leaf vs rootⅡ	2260	GO:0043603	BP	cellular amide metabolic process	2260/15033	0.000398065
leaf vs rootⅡ	370	GO:0009259	BP	ribonucleotide metabolic process	370/15033	0.000398065
leaf vs rootⅡ	1722	GO:0003723	MF	RNA binding	1722/15033	0.000398065
leaf vs rootⅡ	2223	GO:0005198	MF	structural molecule activity	2223/15033	0.000398065
leaf vs rootⅡ	82	GO:0016744	MF	transferase activity, transferring aldehyde or ketonic groups	82/15033	0.000398297
leaf vs rootⅡ	1728	GO:0044281	BP	small molecule metabolic process	1728/15033	0.000401076
leaf vs rootⅡ	2288	GO:0043228	CC	non-membrane-bounded organelle	2288/15033	0.000401076
leaf vs rootⅡ	2288	GO:0043232	CC	intracellular non-membrane-bounded organelle	2288/15033	0.000401076
leaf vs rootⅡ	605	GO:0015318	MF	inorganic molecular entity transmembrane transporter activity	605/15033	0.00040335
leaf vs rootⅡ	2319	GO:0034645	BP	cellular macromolecule biosynthetic process	2319/15033	0.000412117
leaf vs rootⅡ	620	GO:0015075	MF	ion transmembrane transporter activity	620/15033	0.000412117
leaf vs rootⅡ	2369	GO:0009059	BP	macromolecule biosynthetic process	2369/15033	0.000413063
leaf vs rootⅡ	2558	GO:0044267	BP	cellular protein metabolic process	2558/15033	0.000420351
leaf vs rootⅡ	2625	GO:0044271	BP	cellular nitrogen compound biosynthetic process	2625/15033	0.000420351
leaf vs rootⅡ	2725	GO:1901566	BP	organonitrogen compound biosynthetic process	2725/15033	0.000420351
leaf vs rootⅡ	13553	GO:0003674	MF	molecular_function	13553/15033	0.000420351
leaf vs rootⅡ	2620	GO:1990904	CC	ribonucleoprotein complex	2620/15033	0.000423012
leaf vs rootⅡ	220	GO:0006732	BP	coenzyme metabolic process	220/15033	0.000424079
leaf vs rootⅡ	2593	GO:0016491	MF	oxidoreductase activity	2593/15033	0.000424079
leaf vs rootⅡ	41	GO:0004801	MF	sedoheptulose-7-phosphate:D-glyceraldehyde-3-phosphate glyceronetransferase activity	41/15033	0.000431915
leaf vs rootⅡ	253	GO:0072522	BP	purine-containing compound biosynthetic process	253/15033	0.000443392
leaf vs rootⅡ	2764	GO:0019538	BP	protein metabolic process	2764/15033	0.000450605
leaf vs rootⅡ	3713	GO:0009058	BP	biosynthetic process	3713/15033	0.000463026
leaf vs rootⅡ	109	GO:0046933	MF	proton-transporting ATP synthase activity, rotational mechanism	109/15033	0.000463026
leaf vs rootⅡ	3560	GO:1901576	BP	organic substance biosynthetic process	3560/15033	0.000464064
leaf vs rootⅡ	3505	GO:0044249	BP	cellular biosynthetic process	3505/15033	0.000465612
leaf vs rootⅡ	3843	GO:1901564	BP	organonitrogen compound metabolic process	3843/15033	0.000465612
leaf vs rootⅡ	43	GO:0004451	MF	isocitrate lyase activity	43/15033	0.000465612
leaf vs rootⅡ	232	GO:0006164	BP	purine nucleotide biosynthetic process	232/15033	0.000466395
leaf vs rootⅡ	3649	GO:0032991	CC	protein-containing complex	3649/15033	0.000466395
leaf vs rootⅡ	3651	GO:0034641	BP	cellular nitrogen compound metabolic process	3651/15033	0.000469534
leaf vs rootⅡ	279	GO:0005730	CC	nucleolus	279/15033	0.000469534
leaf vs rootⅡ	3378	GO:0044260	BP	cellular macromolecule metabolic process	3378/15033	0.000494376
leaf vs rootⅡ	4718	GO:0043229	CC	intracellular organelle	4718/15033	0.000497233
leaf vs rootⅡ	372	GO:0019693	BP	ribose phosphate metabolic process	372/15033	0.000497481
leaf vs rootⅡ	4720	GO:0043226	CC	organelle	4720/15033	0.000497481
leaf vs rootⅡ	1042	GO:0022857	MF	transmembrane transporter activity	1042/15033	0.000500671
leaf vs rootⅡ	239	GO:0044282	BP	small molecule catabolic process	239/15033	0.000503379
leaf vs rootⅡ	5319	GO:0044444	CC	cytoplasmic part	5319/15033	0.000503379
leaf vs rootⅡ	452	GO:0016829	MF	lyase activity	452/15033	0.00051179
leaf vs rootⅡ	5691	GO:0044238	BP	primary metabolic process	5691/15033	0.000525378
leaf vs rootⅡ	6072	GO:0044237	BP	cellular metabolic process	6072/15033	0.000527262
leaf vs rootⅡ	6887	GO:0008152	BP	metabolic process	6887/15033	0.000527431
leaf vs rootⅡ	6242	GO:0071704	BP	organic substance metabolic process	6242/15033	0.000528048
leaf vs rootⅡ	9489	GO:0008150	BP	biological_process	9489/15033	0.000532139
leaf vs rootⅡ	7534	GO:0009987	BP	cellular process	7534/15033	0.000532139
leaf vs rootⅡ	7345	GO:0044424	CC	intracellular part	7345/15033	0.000532139
leaf vs rootⅡ	7913	GO:0044464	CC	cell part	7913/15033	0.000534659
leaf vs rootⅡ	255	GO:0044437	CC	vacuolar part	255/15033	0.000534925
leaf vs rootⅡ	237	GO:0006979	BP	response to oxidative stress	237/15033	0.000546119
leaf vs rootⅡ	606	GO:0044283	BP	small molecule biosynthetic process	606/15033	0.000575719
leaf vs rootⅡ	243	GO:0009260	BP	ribonucleotide biosynthetic process	243/15033	0.000582118
leaf vs rootⅡ	342	GO:0042592	BP	homeostatic process	342/15033	0.000630582
leaf vs rootⅡ	25	GO:0055081	BP	anion homeostasis	25/15033	0.000639116
leaf vs rootⅡ	52	GO:0004029	MF	aldehyde dehydrogenase (NAD) activity	52/15033	0.000686776
leaf vs rootⅡ	57	GO:0070180	MF	large ribosomal subunit rRNA binding	57/15033	0.000701461
leaf vs rootⅡ	93	GO:0016282	CC	eukaryotic 43S preinitiation complex	93/15033	0.000740565
leaf vs rootⅡ	102	GO:0043022	MF	ribosome binding	102/15033	0.000776852
leaf vs rootⅡ	3204	GO:0044446	CC	intracellular organelle part	3204/15033	0.000787077
leaf vs rootⅡ	3207	GO:0044422	CC	organelle part	3207/15033	0.000789601
leaf vs rootⅡ	132	GO:0044769	MF	ATPase activity, coupled to transmembrane movement of ions, rotational mechanism	132/15033	0.000821474
leaf vs rootⅡ	70	GO:0004096	MF	catalase activity	70/15033	0.000914024
leaf vs rootⅡ	436	GO:0006811	BP	ion transport	436/15033	0.00091697
leaf vs rootⅡ	14	GO:0019285	BP	glycine betaine biosynthetic process from choline	14/15033	0.00100494
leaf vs rootⅡ	14	GO:0006577	BP	amino-acid betaine metabolic process	14/15033	0.00100494
leaf vs rootⅡ	14	GO:0006578	BP	amino-acid betaine biosynthetic process	14/15033	0.00100494
leaf vs rootⅡ	14	GO:0019695	BP	choline metabolic process	14/15033	0.00100494
leaf vs rootⅡ	14	GO:0031455	BP	glycine betaine metabolic process	14/15033	0.00100494
leaf vs rootⅡ	14	GO:0031456	BP	glycine betaine biosynthetic process	14/15033	0.00100494
leaf vs rootⅡ	244	GO:0046390	BP	ribose phosphate biosynthetic process	244/15033	0.00105654
leaf vs rootⅡ	93	GO:0005852	CC	eukaryotic translation initiation factor 3 complex	93/15033	0.00107163
leaf vs rootⅡ	132	GO:0043021	MF	ribonucleoprotein complex binding	132/15033	0.00109973
leaf vs rootⅡ	36	GO:0016018	MF	cyclosporin A binding	36/15033	0.00112815
leaf vs rootⅡ	103	GO:0006098	BP	pentose-phosphate shunt	103/15033	0.00115374
leaf vs rootⅡ	67	GO:0042446	BP	hormone biosynthetic process	67/15033	0.00128866
leaf vs rootⅡ	104	GO:0006740	BP	NADPH regeneration	104/15033	0.00134636
leaf vs rootⅡ	111	GO:0015036	MF	disulfide oxidoreductase activity	111/15033	0.0013555
leaf vs rootⅡ	315	GO:0008610	BP	lipid biosynthetic process	315/15033	0.00139081
leaf vs rootⅡ	1078	GO:0005215	MF	transporter activity	1078/15033	0.00156191
leaf vs rootⅡ	127	GO:0015985	BP	energy coupled proton transport, down electrochemical gradient	127/15033	0.00167808
leaf vs rootⅡ	127	GO:0015986	BP	ATP synthesis coupled proton transport	127/15033	0.00167808
leaf vs rootⅡ	127	GO:0006754	BP	ATP biosynthetic process	127/15033	0.00174638
leaf vs rootⅡ	425	GO:0001883	MF	purine nucleoside binding	425/15033	0.0018356
leaf vs rootⅡ	425	GO:0005525	MF	GTP binding	425/15033	0.0018356
leaf vs rootⅡ	425	GO:0032561	MF	guanyl ribonucleotide binding	425/15033	0.0018356
leaf vs rootⅡ	425	GO:0019001	MF	guanyl nucleotide binding	425/15033	0.0018356
leaf vs rootⅡ	425	GO:0032550	MF	purine ribonucleoside binding	425/15033	0.0018356
leaf vs rootⅡ	325	GO:0010035	BP	response to inorganic substance	325/15033	0.00184247
leaf vs rootⅡ	488	GO:0055086	BP	nucleobase-containing small molecule metabolic process	488/15033	0.00184532
leaf vs rootⅡ	210	GO:0051188	BP	cofactor biosynthetic process	210/15033	0.0018479
leaf vs rootⅡ	433	GO:0016053	BP	organic acid biosynthetic process	433/15033	0.00186796
leaf vs rootⅡ	433	GO:0046394	BP	carboxylic acid biosynthetic process	433/15033	0.00186796
leaf vs rootⅡ	246	GO:0046034	BP	ATP metabolic process	246/15033	0.00194574
leaf vs rootⅡ	75	GO:0031386	MF	protein tag	75/15033	0.00195731
leaf vs rootⅡ	41	GO:0042183	BP	formate catabolic process	41/15033	0.00201503
leaf vs rootⅡ	93	GO:0033290	CC	eukaryotic 48S preinitiation complex	93/15033	0.00209157
leaf vs rootⅡ	93	GO:0070993	CC	translation preinitiation complex	93/15033	0.00209157
leaf vs rootⅡ	456	GO:0008324	MF	cation transmembrane transporter activity	456/15033	0.00221225
leaf vs rootⅡ	188	GO:0051540	MF	metal cluster binding	188/15033	0.00226117
leaf vs rootⅡ	188	GO:0051536	MF	iron-sulfur cluster binding	188/15033	0.00226117
leaf vs rootⅡ	42	GO:0015942	BP	formate metabolic process	42/15033	0.00228139
leaf vs rootⅡ	139	GO:0009145	BP	purine nucleoside triphosphate biosynthetic process	139/15033	0.00228139
leaf vs rootⅡ	139	GO:0009206	BP	purine ribonucleoside triphosphate biosynthetic process	139/15033	0.00228139
leaf vs rootⅡ	139	GO:0009205	BP	purine ribonucleoside triphosphate metabolic process	139/15033	0.00228139
leaf vs rootⅡ	42	GO:0008863	MF	formate dehydrogenase (NAD+) activity	42/15033	0.00228139
leaf vs rootⅡ	347	GO:0003924	MF	GTPase activity	347/15033	0.0023131
leaf vs rootⅡ	140	GO:0009144	BP	purine nucleoside triphosphate metabolic process	140/15033	0.00251224
leaf vs rootⅡ	195	GO:0042651	CC	thylakoid membrane	195/15033	0.00252714
leaf vs rootⅡ	195	GO:0034357	CC	photosynthetic membrane	195/15033	0.00252714
leaf vs rootⅡ	191	GO:0055035	CC	plastid thylakoid membrane	191/15033	0.00262328
leaf vs rootⅡ	191	GO:0009535	CC	chloroplast thylakoid membrane	191/15033	0.00262328
leaf vs rootⅡ	245	GO:0019725	BP	cellular homeostasis	245/15033	0.0026811
leaf vs rootⅡ	469	GO:0044434	CC	chloroplast part	469/15033	0.00270407
leaf vs rootⅡ	72	GO:0008553	MF	proton-exporting ATPase activity, phosphorylative mechanism	72/15033	0.0029708
leaf vs rootⅡ	143	GO:0072593	BP	reactive oxygen species metabolic process	143/15033	0.00299381
leaf vs rootⅡ	405	GO:0009117	BP	nucleotide metabolic process	405/15033	0.00299381
leaf vs rootⅡ	147	GO:0009199	BP	ribonucleoside triphosphate metabolic process	147/15033	0.00304322
leaf vs rootⅡ	147	GO:0009201	BP	ribonucleoside triphosphate biosynthetic process	147/15033	0.00304322
leaf vs rootⅡ	214	GO:0010038	BP	response to metal ion	214/15033	0.00307273
leaf vs rootⅡ	91	GO:0045261	CC	proton-transporting ATP synthase complex, catalytic core F(1)	91/15033	0.00316845
leaf vs rootⅡ	619	GO:1901135	BP	carbohydrate derivative metabolic process	619/15033	0.00326614
leaf vs rootⅡ	112	GO:0006739	BP	NADP metabolic process	112/15033	0.00348546
leaf vs rootⅡ	150	GO:0009142	BP	nucleoside triphosphate biosynthetic process	150/15033	0.00348546
leaf vs rootⅡ	293	GO:0009506	CC	plasmodesma	293/15033	0.00348546
leaf vs rootⅡ	293	GO:0005911	CC	cell-cell junction	293/15033	0.00348546
leaf vs rootⅡ	293	GO:0030054	CC	cell junction	293/15033	0.00353243
leaf vs rootⅡ	11	GO:0048443	BP	stamen development	11/15033	0.00366829
leaf vs rootⅡ	132	GO:0019748	BP	secondary metabolic process	132/15033	0.00394352
leaf vs rootⅡ	472	GO:0044435	CC	plastid part	472/15033	0.00394352
leaf vs rootⅡ	294	GO:0006790	BP	sulfur compound metabolic process	294/15033	0.00419848
leaf vs rootⅡ	40	GO:0004612	MF	phosphoenolpyruvate carboxykinase (ATP) activity	40/15033	0.00419848
leaf vs rootⅡ	67	GO:0042133	BP	neurotransmitter metabolic process	67/15033	0.00443766
leaf vs rootⅡ	67	GO:0001505	BP	regulation of neurotransmitter levels	67/15033	0.00443766
leaf vs rootⅡ	327	GO:0006812	BP	cation transport	327/15033	0.00443766
leaf vs rootⅡ	94	GO:0042026	BP	protein refolding	94/15033	0.00443957
leaf vs rootⅡ	99	GO:0005759	CC	mitochondrial matrix	99/15033	0.00500033
leaf vs rootⅡ	407	GO:0006753	BP	nucleoside phosphate metabolic process	407/15033	0.00506729
leaf vs rootⅡ	426	GO:0032549	MF	ribonucleoside binding	426/15033	0.00543885
leaf vs rootⅡ	426	GO:0001882	MF	nucleoside binding	426/15033	0.00548036
leaf vs rootⅡ	216	GO:0016209	MF	antioxidant activity	216/15033	0.00563897
leaf vs rootⅡ	629	GO:0019637	BP	organophosphate metabolic process	629/15033	0.00577665
leaf vs rootⅡ	23	GO:0005385	MF	zinc ion transmembrane transporter activity	23/15033	0.00579851
leaf vs rootⅡ	87	GO:0000470	BP	maturation of LSU-rRNA	87/15033	0.00585153
leaf vs rootⅡ	91	GO:0015035	MF	protein disulfide oxidoreductase activity	91/15033	0.00602971
leaf vs rootⅡ	43	GO:0004611	MF	phosphoenolpyruvate carboxykinase activity	43/15033	0.00602971
leaf vs rootⅡ	194	GO:0006970	BP	response to osmotic stress	194/15033	0.00611262
leaf vs rootⅡ	75	GO:0035383	BP	thioester metabolic process	75/15033	0.00613305
leaf vs rootⅡ	75	GO:0006637	BP	acyl-CoA metabolic process	75/15033	0.00613305
leaf vs rootⅡ	4681	GO:0006807	BP	nitrogen compound metabolic process	4681/15033	0.00634929
leaf vs rootⅡ	307	GO:0098805	CC	whole membrane	307/15033	0.00634929
leaf vs rootⅡ	73	GO:0072350	BP	tricarboxylic acid metabolic process	73/15033	0.00659939
leaf vs rootⅡ	7	GO:0044572	BP	[4Fe-4S] cluster assembly	7/15033	0.00699099
leaf vs rootⅡ	111	GO:0033178	CC	proton-transporting two-sector ATPase complex, catalytic domain	111/15033	0.00709272
leaf vs rootⅡ	153	GO:0005507	MF	copper ion binding	153/15033	0.00766187
leaf vs rootⅡ	19	GO:0010207	BP	photosystem II assembly	19/15033	0.00771695
leaf vs rootⅡ	47	GO:0016833	MF	oxo-acid-lyase activity	47/15033	0.00783581
leaf vs rootⅡ	84	GO:0042445	BP	hormone metabolic process	84/15033	0.0080368
leaf vs rootⅡ	423	GO:0022890	MF	inorganic cation transmembrane transporter activity	423/15033	0.0080388
leaf vs rootⅡ	32	GO:0009060	BP	aerobic respiration	32/15033	0.00855016
leaf vs rootⅡ	18	GO:0003938	MF	IMP dehydrogenase activity	18/15033	0.00956789
leaf vs rootⅡ	452	GO:0055085	BP	transmembrane transport	452/15033	0.00966711
leaf vs rootⅡ	101	GO:0010817	BP	regulation of hormone levels	101/15033	0.00989094
leaf vs rootⅡ	11	GO:0048437	BP	floral organ development	11/15033	0.00999677
leaf vs rootⅡ	80	GO:0006081	BP	cellular aldehyde metabolic process	80/15033	0.0101341
leaf vs rootⅡ	141	GO:0048878	BP	chemical homeostasis	141/15033	0.0101927
leaf vs rootⅡ	105	GO:0051156	BP	glucose 6-phosphate metabolic process	105/15033	0.0102156
leaf vs rootⅡ	184	GO:0009651	BP	response to salt stress	184/15033	0.0102429
leaf vs rootⅡ	126	GO:0051187	BP	cofactor catabolic process	126/15033	0.0108823
leaf vs rootⅡ	12	GO:0004575	MF	sucrose alpha-glucosidase activity	12/15033	0.0111895
leaf vs rootⅡ	21	GO:0009450	BP	gamma-aminobutyric acid catabolic process	21/15033	0.0112008
leaf vs rootⅡ	85	GO:0033865	BP	nucleoside bisphosphate metabolic process	85/15033	0.0112008
leaf vs rootⅡ	85	GO:0033875	BP	ribonucleoside bisphosphate metabolic process	85/15033	0.0112008
leaf vs rootⅡ	85	GO:0034032	BP	purine nucleoside bisphosphate metabolic process	85/15033	0.0112008
leaf vs rootⅡ	29	GO:0009654	CC	photosystem II oxygen evolving complex	29/15033	0.0115816
leaf vs rootⅡ	267	GO:1901293	BP	nucleoside phosphate biosynthetic process	267/15033	0.0117735
leaf vs rootⅡ	16	GO:2000022	BP	regulation of jasmonic acid mediated signaling pathway	16/15033	0.0124826
leaf vs rootⅡ	161	GO:1901615	BP	organic hydroxy compound metabolic process	161/15033	0.0129376
leaf vs rootⅡ	2553	GO:0043169	MF	cation binding	2553/15033	0.0129763
leaf vs rootⅡ	8	GO:0015181	MF	arginine transmembrane transporter activity	8/15033	0.0129763
leaf vs rootⅡ	35	GO:0030515	MF	snoRNA binding	35/15033	0.0134504
leaf vs rootⅡ	22	GO:0009448	BP	gamma-aminobutyric acid metabolic process	22/15033	0.0142453
leaf vs rootⅡ	264	GO:0009165	BP	nucleotide biosynthetic process	264/15033	0.0145216
leaf vs rootⅡ	132	GO:0006006	BP	glucose metabolic process	132/15033	0.0146292
leaf vs rootⅡ	1864	GO:0016020	CC	membrane	1864/15033	0.0170065
leaf vs rootⅡ	9	GO:0033542	BP	fatty acid beta-oxidation, unsaturated, even number	9/15033	0.0177397
leaf vs rootⅡ	6	GO:0000170	MF	sphingosine hydroxylase activity	6/15033	0.0177397
leaf vs rootⅡ	6	GO:0047746	MF	chlorophyllase activity	6/15033	0.0177397
leaf vs rootⅡ	9	GO:0080023	MF	3R-hydroxyacyl-CoA dehydratase activity	9/15033	0.0177397
leaf vs rootⅡ	2518	GO:0046872	MF	metal ion binding	2518/15033	0.0180539
leaf vs rootⅡ	37	GO:0009705	CC	plant-type vacuole membrane	37/15033	0.02074
leaf vs rootⅡ	10	GO:0015189	MF	L-lysine transmembrane transporter activity	10/15033	0.0208419
leaf vs rootⅡ	21	GO:0009013	MF	succinate-semialdehyde dehydrogenase [NAD(P)+] activity	21/15033	0.0219108
leaf vs rootⅡ	86	GO:0015662	MF	ion transmembrane transporter activity, phosphorylative mechanism	86/15033	0.0219108
leaf vs rootⅡ	152	GO:0009141	BP	nucleoside triphosphate metabolic process	152/15033	0.0228891
leaf vs rootⅡ	95	GO:0003755	MF	peptidyl-prolyl cis-trans isomerase activity	95/15033	0.0242589
leaf vs rootⅡ	49	GO:0000275	CC	mitochondrial proton-transporting ATP synthase complex, catalytic core F(1)	49/15033	0.0246056
leaf vs rootⅡ	96	GO:0016859	MF	cis-trans isomerase activity	96/15033	0.0247911
leaf vs rootⅡ	74	GO:0009521	CC	photosystem	74/15033	0.0261852
leaf vs rootⅡ	44	GO:0009611	BP	response to wounding	44/15033	0.026274
leaf vs rootⅡ	18	GO:0015718	BP	monocarboxylic acid transport	18/15033	0.0280234
leaf vs rootⅡ	13	GO:0004564	MF	beta-fructofuranosidase activity	13/15033	0.0280234
leaf vs rootⅡ	106	GO:0140352	BP	export from cell	106/15033	0.0286278
leaf vs rootⅡ	159	GO:0044272	BP	sulfur compound biosynthetic process	159/15033	0.0293555
leaf vs rootⅡ	1261	GO:0050896	BP	response to stimulus	1261/15033	0.0302959
leaf vs rootⅡ	7	GO:0015812	BP	gamma-aminobutyric acid transport	7/15033	0.0302959
leaf vs rootⅡ	160	GO:0016684	MF	oxidoreductase activity, acting on peroxide as acceptor	160/15033	0.0302959
leaf vs rootⅡ	7	GO:0022858	MF	alanine transmembrane transporter activity	7/15033	0.0302959
leaf vs rootⅡ	7	GO:0015185	MF	gamma-aminobutyric acid transmembrane transporter activity	7/15033	0.0302959
leaf vs rootⅡ	7	GO:0015180	MF	L-alanine transmembrane transporter activity	7/15033	0.0302959
leaf vs rootⅡ	7	GO:0030371	MF	translation repressor activity	7/15033	0.0302959
leaf vs rootⅡ	7	GO:0015175	MF	neutral amino acid transmembrane transporter activity	7/15033	0.0302959
leaf vs rootⅡ	183	GO:0042737	BP	drug catabolic process	183/15033	0.0315802
leaf vs rootⅡ	22	GO:0009052	BP	pentose-phosphate shunt, non-oxidative branch	22/15033	0.0321213
leaf vs rootⅡ	152	GO:0009617	BP	response to bacterium	152/15033	0.0321865
leaf vs rootⅡ	45	GO:0008097	MF	5S rRNA binding	45/15033	0.0322286
leaf vs rootⅡ	28	GO:0004033	MF	aldo-keto reductase (NADP) activity	28/15033	0.0325217
leaf vs rootⅡ	15	GO:0008802	MF	betaine-aldehyde dehydrogenase activity	15/15033	0.0325861
leaf vs rootⅡ	40	GO:0000104	MF	succinate dehydrogenase activity	40/15033	0.0343202
leaf vs rootⅡ	43	GO:0006635	BP	fatty acid beta-oxidation	43/15033	0.0343396
leaf vs rootⅡ	18	GO:0008028	MF	monocarboxylic acid transmembrane transporter activity	18/15033	0.0353923
leaf vs rootⅡ	58	GO:0016668	MF	oxidoreductase activity, acting on a sulfur group of donors, NAD(P) as acceptor	58/15033	0.0367274
leaf vs rootⅡ	26	GO:0008106	MF	alcohol dehydrogenase (NADP+) activity	26/15033	0.0370365
leaf vs rootⅡ	151	GO:0009416	BP	response to light stimulus	151/15033	0.0371101
leaf vs rootⅡ	59	GO:0018298	BP	protein-chromophore linkage	59/15033	0.0380669
leaf vs rootⅡ	41	GO:0006778	BP	porphyrin-containing compound metabolic process	41/15033	0.0397418
leaf vs rootⅡ	29	GO:0006102	BP	isocitrate metabolic process	29/15033	0.0408448
leaf vs rootⅡ	36	GO:0045333	BP	cellular respiration	36/15033	0.040985
leaf vs rootⅡ	47	GO:0046128	BP	purine ribonucleoside metabolic process	47/15033	0.041153
leaf vs rootⅡ	9	GO:0006836	BP	neurotransmitter transport	9/15033	0.0417321
leaf vs rootⅡ	9	GO:0005313	MF	L-glutamate transmembrane transporter activity	9/15033	0.0417321
leaf vs rootⅡ	9	GO:0015172	MF	acidic amino acid transmembrane transporter activity	9/15033	0.0417321
leaf vs rootⅡ	19	GO:0004777	MF	succinate-semialdehyde dehydrogenase (NAD+) activity	19/15033	0.0425144
leaf vs rootⅡ	17	GO:0004070	MF	aspartate carbamoyltransferase activity	17/15033	0.0426304
leaf vs rootⅡ	10	GO:0010214	BP	seed coat development	10/15033	0.0432979
leaf vs rootⅡ	5	GO:0102293	MF	pheophytinase b activity	5/15033	0.0436345
leaf vs rootⅡ	5	GO:0010277	MF	chlorophyllide a oxygenase [overall] activity	5/15033	0.0436345
leaf vs rootⅡ	61	GO:0009522	CC	photosystem I	61/15033	0.0447134
leaf vs rootⅡ	99	GO:0050801	BP	ion homeostasis	99/15033	0.0453935
leaf vs rootⅡ	132	GO:1990204	CC	oxidoreductase complex	132/15033	0.0456735
leaf vs rootⅡ	61	GO:0042558	BP	pteridine-containing compound metabolic process	61/15033	0.0469353
leaf vs rootⅡ	195	GO:0004497	MF	monooxygenase activity	195/15033	0.0480073
leaf vs rootⅡ	30	GO:0005471	MF	ATP:ADP antiporter activity	30/15033	0.0501466
leaf vs rootⅡ	43	GO:0009062	BP	fatty acid catabolic process	43/15033	0.0509274
leaf vs rootⅡ	43	GO:0019395	BP	fatty acid oxidation	43/15033	0.0509274
leaf vs rootⅡ	62	GO:0009523	CC	photosystem II	62/15033	0.0509274
leaf vs rootⅡ	63	GO:0044242	BP	cellular lipid catabolic process	63/15033	0.0533215
leaf vs rootⅡ	33	GO:0043891	MF	glyceraldehyde-3-phosphate dehydrogenase (NAD(P)+) (phosphorylating) activity	33/15033	0.0536752
leaf vs rootⅡ	33	GO:0004365	MF	glyceraldehyde-3-phosphate dehydrogenase (NAD+) (phosphorylating) activity	33/15033	0.0536752
leaf vs rootⅡ	56	GO:0016168	MF	chlorophyll binding	56/15033	0.0546015
leaf vs rootⅡ	47	GO:0009119	BP	ribonucleoside metabolic process	47/15033	0.0559109
leaf vs rootⅡ	67	GO:0070469	CC	respirasome	67/15033	0.0559109
leaf vs rootⅡ	833	GO:0005886	CC	plasma membrane	833/15033	0.0579618
leaf vs rootⅡ	47	GO:0016226	BP	iron-sulfur cluster assembly	47/15033	0.0595807
leaf vs rootⅡ	47	GO:0031163	BP	metallo-sulfur cluster assembly	47/15033	0.0595807
leaf vs rootⅡ	110	GO:0042744	BP	hydrogen peroxide catabolic process	110/15033	0.0596724
leaf vs rootⅡ	152	GO:0022853	MF	active ion transmembrane transporter activity	152/15033	0.0612229
leaf vs rootⅡ	153	GO:0009314	BP	response to radiation	153/15033	0.0629899
leaf vs rootⅡ	39	GO:0015301	MF	anion:anion antiporter activity	39/15033	0.0629899
leaf vs rootⅡ	39	GO:0140323	MF	solute:anion antiporter activity	39/15033	0.0629899
leaf vs rootⅡ	58	GO:0006760	BP	folic acid-containing compound metabolic process	58/15033	0.0642509
leaf vs rootⅡ	66	GO:0004364	MF	glutathione transferase activity	66/15033	0.0649397
leaf vs rootⅡ	31	GO:0015217	MF	ADP transmembrane transporter activity	31/15033	0.0658382
leaf vs rootⅡ	34	GO:1902652	BP	secondary alcohol metabolic process	34/15033	0.0660633
leaf vs rootⅡ	128	GO:0098800	CC	inner mitochondrial membrane protein complex	128/15033	0.0660633
leaf vs rootⅡ	6	GO:0102311	MF	8-hydroxygeraniol dehydrogenase activity	6/15033	0.0660633
leaf vs rootⅡ	55	GO:0006084	BP	acetyl-CoA metabolic process	55/15033	0.0669814
leaf vs rootⅡ	662	GO:1901362	BP	organic cyclic compound biosynthetic process	662/15033	0.0681416
leaf vs rootⅡ	20	GO:0005310	MF	dicarboxylic acid transmembrane transporter activity	20/15033	0.0681416
leaf vs rootⅡ	40	GO:0006334	BP	nucleosome assembly	40/15033	0.0700924
leaf vs rootⅡ	67	GO:0006730	BP	one-carbon metabolic process	67/15033	0.0712934
leaf vs rootⅡ	22	GO:0009331	CC	glycerol-3-phosphate dehydrogenase complex	22/15033	0.0721415
leaf vs rootⅡ	50	GO:0035384	BP	thioester biosynthetic process	50/15033	0.0733651
leaf vs rootⅡ	50	GO:0071616	BP	acyl-CoA biosynthetic process	50/15033	0.0733651
leaf vs rootⅡ	84	GO:0016655	MF	oxidoreductase activity, acting on NAD(P)H, quinone or similar compound as acceptor	84/15033	0.0733651
leaf vs rootⅡ	38	GO:0008177	MF	succinate dehydrogenase (ubiquinone) activity	38/15033	0.0755898
leaf vs rootⅡ	18	GO:0016743	MF	carboxyl- or carbamoyltransferase activity	18/15033	0.0761288
leaf vs rootⅡ	32	GO:0005347	MF	ATP transmembrane transporter activity	32/15033	0.0767916
leaf vs rootⅡ	47	GO:0042278	BP	purine nucleoside metabolic process	47/15033	0.0768216
leaf vs rootⅡ	47	GO:0006085	BP	acetyl-CoA biosynthetic process	47/15033	0.0768216
leaf vs rootⅡ	7	GO:0017014	BP	protein nitrosylation	7/15033	0.0768216
leaf vs rootⅡ	7	GO:0080142	BP	regulation of salicylic acid biosynthetic process	7/15033	0.0768216
leaf vs rootⅡ	7	GO:0033484	BP	nitric oxide homeostasis	7/15033	0.0768216
leaf vs rootⅡ	7	GO:0033483	BP	gas homeostasis	7/15033	0.0768216
leaf vs rootⅡ	134	GO:0016765	MF	transferase activity, transferring alkyl or aryl (other than methyl) groups	134/15033	0.0790557
leaf vs rootⅡ	58	GO:0031667	BP	response to nutrient levels	58/15033	0.0805271
leaf vs rootⅡ	8	GO:0010023	BP	proanthocyanidin biosynthetic process	8/15033	0.0805973
leaf vs rootⅡ	8	GO:0046885	BP	regulation of hormone biosynthetic process	8/15033	0.0805973
leaf vs rootⅡ	8	GO:0036456	MF	L-methionine-(S)-S-oxide reductase activity	8/15033	0.0805973
leaf vs rootⅡ	8	GO:0008957	MF	phenylacetaldehyde dehydrogenase activity	8/15033	0.0805973
leaf vs rootⅡ	8	GO:0047215	MF	indole-3-acetate beta-glucosyltransferase activity	8/15033	0.0805973
leaf vs rootⅡ	8	GO:0033744	MF	L-methionine:thioredoxin-disulfide S-oxidoreductase activity	8/15033	0.0805973
leaf vs rootⅡ	33	GO:1901068	BP	guanosine-containing compound metabolic process	33/15033	0.0807438
leaf vs rootⅡ	147	GO:0004601	MF	peroxidase activity	147/15033	0.0809818
leaf vs rootⅡ	11	GO:0009298	BP	GDP-mannose biosynthetic process	11/15033	0.0816631
leaf vs rootⅡ	15	GO:0015179	MF	L-amino acid transmembrane transporter activity	15/15033	0.0818299
leaf vs rootⅡ	13	GO:0016656	MF	monodehydroascorbate reductase (NADH) activity	13/15033	0.0819914
leaf vs rootⅡ	13	GO:0034513	MF	box H/ACA snoRNA binding	13/15033	0.0819914
leaf vs rootⅡ	48	GO:0034440	BP	lipid oxidation	48/15033	0.0832929
leaf vs rootⅡ	19	GO:0006177	BP	GMP biosynthetic process	19/15033	0.0853809
leaf vs rootⅡ	19	GO:0046037	BP	GMP metabolic process	19/15033	0.0853809
leaf vs rootⅡ	111	GO:0042743	BP	hydrogen peroxide metabolic process	111/15033	0.0857448
leaf vs rootⅡ	36	GO:0004616	MF	phosphogluconate dehydrogenase (decarboxylating) activity	36/15033	0.0857996
leaf vs rootⅡ	42	GO:0016635	MF	oxidoreductase activity, acting on the CH-CH group of donors, quinone or related compound as acceptor	42/15033	0.0862432
leaf vs rootⅡ	236	GO:0051082	MF	unfolded protein binding	236/15033	0.0868748
leaf vs rootⅡ	483	GO:0009628	BP	response to abiotic stimulus	483/15033	0.0871294
leaf vs rootⅡ	21	GO:1902074	BP	response to salt	21/15033	0.0875198
leaf vs rootⅡ	21	GO:0004499	MF	N,N-dimethylaniline monooxygenase activity	21/15033	0.0875198
leaf vs rootⅡ	17	GO:2001057	BP	reactive nitrogen species metabolic process	17/15033	0.0926749
leaf vs rootⅡ	17	GO:0042128	BP	nitrate assimilation	17/15033	0.0926749
leaf vs rootⅡ	17	GO:0042126	BP	nitrate metabolic process	17/15033	0.0926749
leaf vs rootⅡ	34	GO:0004448	MF	isocitrate dehydrogenase activity	34/15033	0.0926909
leaf vs rootⅡ	564	GO:0042221	BP	response to chemical	564/15033	0.0941738
leaf vs rootⅡ	10	GO:1901001	BP	negative regulation of response to salt stress	10/15033	0.094798
leaf vs rootⅡ	380	GO:0044255	BP	cellular lipid metabolic process	380/15033	0.0948144
leaf vs rootⅡ	43	GO:0046129	BP	purine ribonucleoside biosynthetic process	43/15033	0.0956091
leaf vs rootⅡ	43	GO:0042451	BP	purine nucleoside biosynthetic process	43/15033	0.0956091
leaf vs rootⅡ	43	GO:0042455	BP	ribonucleoside biosynthetic process	43/15033	0.0956091
leaf vs rootⅡ	43	GO:0009163	BP	nucleoside biosynthetic process	43/15033	0.0956091
leaf vs rootⅡ	37	GO:0019520	BP	aldonic acid metabolic process	37/15033	0.0969682
leaf vs rootⅡ	24	GO:0052646	BP	alditol phosphate metabolic process	24/15033	0.0978493
leaf vs rootⅡ	24	GO:0006072	BP	glycerol-3-phosphate metabolic process	24/15033	0.0978493
leaf vs rootⅡ	24	GO:0005854	CC	nascent polypeptide-associated complex	24/15033	0.0978493
leaf vs rootⅡ	50	GO:0009765	BP	photosynthesis, light harvesting	50/15033	0.0980659
leaf vs rootⅡ	15	GO:0004069	MF	L-aspartate:2-oxoglutarate aminotransferase activity	15/15033	0.099779
leaf vs rootⅡ	61	GO:0000302	BP	response to reactive oxygen species	61/15033	0.1005
leaf vs rootⅡ	12	GO:0009074	BP	aromatic amino acid family catabolic process	12/15033	0.102694
leaf vs rootⅡ	12	GO:0071540	CC	eukaryotic translation initiation factor 3 complex, eIF3e	12/15033	0.102694
leaf vs rootⅡ	12	GO:0015174	MF	basic amino acid transmembrane transporter activity	12/15033	0.102694
leaf vs rootⅡ	4	GO:0045038	BP	protein import into chloroplast thylakoid membrane	4/15033	0.104106
leaf vs rootⅡ	4	GO:0051307	BP	meiotic chromosome separation	4/15033	0.104106
leaf vs rootⅡ	4	GO:0034035	BP	purine ribonucleoside bisphosphate metabolic process	4/15033	0.104106
leaf vs rootⅡ	4	GO:0015969	BP	guanosine tetraphosphate metabolic process	4/15033	0.104106
leaf vs rootⅡ	4	GO:0120091	MF	jasmonic acid hydrolase	4/15033	0.104106
leaf vs rootⅡ	22	GO:0042537	BP	benzene-containing compound metabolic process	22/15033	0.108888
leaf vs rootⅡ	55	GO:0033866	BP	nucleoside bisphosphate biosynthetic process	55/15033	0.110401
leaf vs rootⅡ	55	GO:0034030	BP	ribonucleoside bisphosphate biosynthetic process	55/15033	0.110401
leaf vs rootⅡ	55	GO:0034033	BP	purine nucleoside bisphosphate biosynthetic process	55/15033	0.110401
leaf vs rootⅡ	67	GO:0046912	MF	transferase activity, transferring acyl groups, acyl groups converted into alkyl on transfer	67/15033	0.110401
leaf vs rootⅡ	588	GO:0019438	BP	aromatic compound biosynthetic process	588/15033	0.112086
leaf vs rootⅡ	42	GO:0033013	BP	tetrapyrrole metabolic process	42/15033	0.113298
leaf vs rootⅡ	90	GO:0006066	BP	alcohol metabolic process	90/15033	0.114
leaf vs rootⅡ	9	GO:0048825	BP	cotyledon development	9/15033	0.114
leaf vs rootⅡ	9	GO:0045282	CC	plasma membrane succinate dehydrogenase complex	9/15033	0.114
leaf vs rootⅡ	9	GO:0005326	MF	neurotransmitter transmembrane transporter activity	9/15033	0.114
leaf vs rootⅡ	219	GO:0051707	BP	response to other organism	219/15033	0.115593
leaf vs rootⅡ	49	GO:0000463	BP	maturation of LSU-rRNA from tricistronic rRNA transcript (SSU-rRNA, 5.8S rRNA, LSU-rRNA)	49/15033	0.115676
leaf vs rootⅡ	36	GO:0019521	BP	D-gluconate metabolic process	36/15033	0.115703
leaf vs rootⅡ	16	GO:0004088	MF	carbamoyl-phosphate synthase (glutamine-hydrolyzing) activity	16/15033	0.115703
leaf vs rootⅡ	60	GO:0046942	BP	carboxylic acid transport	60/15033	0.116548
leaf vs rootⅡ	60	GO:0015849	BP	organic acid transport	60/15033	0.116548
leaf vs rootⅡ	14	GO:0001731	BP	formation of translation preinitiation complex	14/15033	0.122797
leaf vs rootⅡ	14	GO:0030497	BP	fatty acid elongation	14/15033	0.122797
leaf vs rootⅡ	93	GO:0016042	BP	lipid catabolic process	93/15033	0.130765
leaf vs rootⅡ	114	GO:0051539	MF	4 iron, 4 sulfur cluster binding	114/15033	0.130984
leaf vs rootⅡ	44	GO:1901659	BP	glycosyl compound biosynthetic process	44/15033	0.136329
leaf vs rootⅡ	21	GO:0004791	MF	thioredoxin-disulfide reductase activity	21/15033	0.138262
leaf vs rootⅡ	59	GO:0009991	BP	response to extracellular stimulus	59/15033	0.138512
leaf vs rootⅡ	10	GO:0034663	CC	endoplasmic reticulum chaperone complex	10/15033	0.138717
leaf vs rootⅡ	5	GO:0015996	BP	chlorophyll catabolic process	5/15033	0.140145
leaf vs rootⅡ	5	GO:0006787	BP	porphyrin-containing compound catabolic process	5/15033	0.140145
leaf vs rootⅡ	5	GO:0046149	BP	pigment catabolic process	5/15033	0.140145
leaf vs rootⅡ	5	GO:0033015	BP	tetrapyrrole catabolic process	5/15033	0.140145
leaf vs rootⅡ	5	GO:0015204	MF	urea transmembrane transporter activity	5/15033	0.140145
leaf vs rootⅡ	5	GO:0000293	MF	ferric-chelate reductase activity	5/15033	0.140145
leaf vs rootⅡ	5	GO:0016723	MF	oxidoreductase activity, oxidizing metal ions, NAD or NADP as acceptor	5/15033	0.140145
leaf vs rootⅡ	101	GO:0016831	MF	carboxy-lyase activity	101/15033	0.141764
leaf vs rootⅡ	18	GO:0047484	BP	regulation of response to osmotic stress	18/15033	0.142012
leaf vs rootⅡ	18	GO:1901000	BP	regulation of response to salt stress	18/15033	0.142012
leaf vs rootⅡ	289	GO:0009605	BP	response to external stimulus	289/15033	0.145294
leaf vs rootⅡ	35	GO:0042542	BP	response to hydrogen peroxide	35/15033	0.147535
leaf vs rootⅡ	26	GO:0016408	MF	C-acyltransferase activity	26/15033	0.147535
leaf vs rootⅡ	87	GO:0008514	MF	organic anion transmembrane transporter activity	87/15033	0.148591
leaf vs rootⅡ	7	GO:0072321	BP	chaperone-mediated protein transport	7/15033	0.149134
leaf vs rootⅡ	7	GO:0042372	BP	phylloquinone biosynthetic process	7/15033	0.149134
leaf vs rootⅡ	7	GO:0042374	BP	phylloquinone metabolic process	7/15033	0.149134
leaf vs rootⅡ	21	GO:0031428	CC	box C/D snoRNP complex	21/15033	0.149134
leaf vs rootⅡ	21	GO:0004032	MF	alditol:NADP+ 1-oxidoreductase activity	21/15033	0.149134
leaf vs rootⅡ	6	GO:0090447	MF	glycerol-3-phosphate 2-O-acyltransferase activity	6/15033	0.149134
leaf vs rootⅡ	6	GO:0015128	MF	gluconate transmembrane transporter activity	6/15033	0.149134
leaf vs rootⅡ	6	GO:0010279	MF	indole-3-acetic acid amido synthetase activity	6/15033	0.149134
leaf vs rootⅡ	7	GO:0008410	MF	CoA-transferase activity	7/15033	0.149134
leaf vs rootⅡ	7	GO:0102078	MF	methyl jasmonate methylesterase activity	7/15033	0.149134
leaf vs rootⅡ	45	GO:0006101	BP	citrate metabolic process	45/15033	0.149896
leaf vs rootⅡ	14	GO:0046168	BP	glycerol-3-phosphate catabolic process	14/15033	0.150254
leaf vs rootⅡ	14	GO:0004367	MF	glycerol-3-phosphate dehydrogenase [NAD+] activity	14/15033	0.150254
leaf vs rootⅡ	32	GO:0000295	MF	adenine nucleotide transmembrane transporter activity	32/15033	0.150782
leaf vs rootⅡ	32	GO:0015216	MF	purine nucleotide transmembrane transporter activity	32/15033	0.150782
leaf vs rootⅡ	32	GO:0005346	MF	purine ribonucleotide transmembrane transporter activity	32/15033	0.150782
leaf vs rootⅡ	13	GO:1902626	BP	assembly of large subunit precursor of preribosome	13/15033	0.154042
leaf vs rootⅡ	13	GO:0019646	BP	aerobic electron transport chain	13/15033	0.154042
leaf vs rootⅡ	9	GO:0006123	BP	mitochondrial electron transport, cytochrome c to oxygen	9/15033	0.154042
leaf vs rootⅡ	9	GO:1900425	BP	negative regulation of defense response to bacterium	9/15033	0.154042
leaf vs rootⅡ	9	GO:0000454	BP	snoRNA guided rRNA pseudouridine synthesis	9/15033	0.154042
leaf vs rootⅡ	27	GO:0006452	BP	translational frameshifting	27/15033	0.154042
leaf vs rootⅡ	27	GO:0045905	BP	positive regulation of translational termination	27/15033	0.154042
leaf vs rootⅡ	27	GO:0045901	BP	positive regulation of translational elongation	27/15033	0.154042
leaf vs rootⅡ	9	GO:0004476	MF	mannose-6-phosphate isomerase activity	9/15033	0.154042
leaf vs rootⅡ	9	GO:0045485	MF	omega-6 fatty acid desaturase activity	9/15033	0.154042
leaf vs rootⅡ	11	GO:0009640	BP	photomorphogenesis	11/15033	0.155693
leaf vs rootⅡ	123	GO:0042742	BP	defense response to bacterium	123/15033	0.157044
leaf vs rootⅡ	833	GO:0005829	CC	cytosol	833/15033	0.158252
leaf vs rootⅡ	124	GO:0009108	BP	coenzyme biosynthetic process	124/15033	0.164218
leaf vs rootⅡ	15	GO:0019427	BP	acetyl-CoA biosynthetic process from acetate	15/15033	0.16508
leaf vs rootⅡ	15	GO:0006083	BP	acetate metabolic process	15/15033	0.16508
leaf vs rootⅡ	24	GO:0015994	BP	chlorophyll metabolic process	24/15033	0.16898
leaf vs rootⅡ	17	GO:0005853	CC	eukaryotic translation elongation factor 1 complex	17/15033	0.170138
leaf vs rootⅡ	17	GO:0016229	MF	steroid dehydrogenase activity	17/15033	0.170138
leaf vs rootⅡ	227	GO:0016747	MF	transferase activity, transferring acyl groups other than amino-acyl groups	227/15033	0.17018
leaf vs rootⅡ	36	GO:0015215	MF	nucleotide transmembrane transporter activity	36/15033	0.17018
leaf vs rootⅡ	19	GO:0006556	BP	S-adenosylmethionine biosynthetic process	19/15033	0.171174
leaf vs rootⅡ	87	GO:0009063	BP	cellular amino acid catabolic process	87/15033	0.171677
leaf vs rootⅡ	30	GO:0032440	MF	2-alkenal reductase [NAD(P)] activity	30/15033	0.175449
leaf vs rootⅡ	13	GO:0019673	BP	GDP-mannose metabolic process	13/15033	0.182891
leaf vs rootⅡ	94	GO:0042493	BP	response to drug	94/15033	0.184811
leaf vs rootⅡ	56	GO:0015980	BP	energy derivation by oxidation of organic compounds	56/15033	0.184811
leaf vs rootⅡ	8	GO:0009704	BP	de-etiolation	8/15033	0.188391
leaf vs rootⅡ	8	GO:0009943	BP	adaxial/abaxial axis specification	8/15033	0.188391
leaf vs rootⅡ	8	GO:0006540	BP	glutamate decarboxylation to succinate	8/15033	0.188391
leaf vs rootⅡ	8	GO:0046189	BP	phenol-containing compound biosynthetic process	8/15033	0.188391
leaf vs rootⅡ	8	GO:0030795	MF	jasmonate O-methyltransferase activity	8/15033	0.188391
leaf vs rootⅡ	219	GO:0043207	BP	response to external biotic stimulus	219/15033	0.188876
leaf vs rootⅡ	45	GO:0016878	MF	acid-thiol ligase activity	45/15033	0.189682
leaf vs rootⅡ	25	GO:0042135	BP	neurotransmitter catabolic process	25/15033	0.193365
leaf vs rootⅡ	15	GO:0019430	BP	removal of superoxide radicals	15/15033	0.193365
leaf vs rootⅡ	15	GO:0006801	BP	superoxide metabolic process	15/15033	0.193365
leaf vs rootⅡ	15	GO:0016208	MF	AMP binding	15/15033	0.193365
leaf vs rootⅡ	232	GO:0009607	BP	response to biotic stimulus	232/15033	0.197247
leaf vs rootⅡ	38	GO:0005732	CC	small nucleolar ribonucleoprotein complex	38/15033	0.199569
leaf vs rootⅡ	46	GO:0009636	BP	response to toxic substance	46/15033	0.200252
leaf vs rootⅡ	26	GO:0043023	MF	ribosomal large subunit binding	26/15033	0.201359
leaf vs rootⅡ	323	GO:0016746	MF	transferase activity, transferring acyl groups	323/15033	0.20494
leaf vs rootⅡ	10503	GO:0005575	CC	cellular_component	10503/15033	0.206498
leaf vs rootⅡ	29	GO:1901070	BP	guanosine-containing compound biosynthetic process	29/15033	0.206676
leaf vs rootⅡ	16	GO:1903409	BP	reactive oxygen species biosynthetic process	16/15033	0.209801
leaf vs rootⅡ	32	GO:0016405	MF	CoA-ligase activity	32/15033	0.210909
leaf vs rootⅡ	36	GO:0005315	MF	inorganic phosphate transmembrane transporter activity	36/15033	0.217161
leaf vs rootⅡ	869	GO:0006796	BP	phosphate-containing compound metabolic process	869/15033	0.220156
leaf vs rootⅡ	27	GO:0006449	BP	regulation of translational termination	27/15033	0.222053
leaf vs rootⅡ	27	GO:0051920	MF	peroxiredoxin activity	27/15033	0.222053
leaf vs rootⅡ	229	GO:0005506	MF	iron ion binding	229/15033	0.222106
leaf vs rootⅡ	40	GO:0042594	BP	response to starvation	40/15033	0.22513
leaf vs rootⅡ	330	GO:0090407	BP	organophosphate biosynthetic process	330/15033	0.226733
leaf vs rootⅡ	71	GO:0015711	BP	organic anion transport	71/15033	0.230241
leaf vs rootⅡ	14	GO:0044571	BP	[2Fe-2S] cluster assembly	14/15033	0.230483
leaf vs rootⅡ	10	GO:0008216	BP	spermidine metabolic process	10/15033	0.230483
leaf vs rootⅡ	10	GO:0008295	BP	spermidine biosynthetic process	10/15033	0.230483
leaf vs rootⅡ	3	GO:0060263	BP	regulation of respiratory burst	3/15033	0.230483
leaf vs rootⅡ	3	GO:0060267	BP	positive regulation of respiratory burst	3/15033	0.230483
leaf vs rootⅡ	3	GO:0007349	BP	cellularization	3/15033	0.230483
leaf vs rootⅡ	3	GO:0006531	BP	aspartate metabolic process	3/15033	0.230483
leaf vs rootⅡ	3	GO:0009558	BP	embryo sac cellularization	3/15033	0.230483
leaf vs rootⅡ	3	GO:0007112	BP	male meiosis cytokinesis	3/15033	0.230483
leaf vs rootⅡ	3	GO:0072351	BP	tricarboxylic acid biosynthetic process	3/15033	0.230483
leaf vs rootⅡ	3	GO:0030417	BP	nicotianamine metabolic process	3/15033	0.230483
leaf vs rootⅡ	3	GO:0030418	BP	nicotianamine biosynthetic process	3/15033	0.230483
leaf vs rootⅡ	3	GO:0090379	BP	secondary cell wall biogenesis involved in seed trichome differentiation	3/15033	0.230483
leaf vs rootⅡ	3	GO:0045962	BP	positive regulation of development, heterochronic	3/15033	0.230483
leaf vs rootⅡ	3	GO:0033206	BP	meiotic cytokinesis	3/15033	0.230483
leaf vs rootⅡ	21	GO:0051903	MF	S-(hydroxymethyl)glutathione dehydrogenase activity	21/15033	0.230483
leaf vs rootⅡ	14	GO:0043546	MF	molybdopterin cofactor binding	14/15033	0.230483
leaf vs rootⅡ	3	GO:0070401	MF	NADP+ binding	3/15033	0.230483
leaf vs rootⅡ	3	GO:0047655	MF	allyl-alcohol dehydrogenase activity	3/15033	0.230483
leaf vs rootⅡ	3	GO:0030410	MF	nicotianamine synthase activity	3/15033	0.230483
leaf vs rootⅡ	3	GO:0004655	MF	porphobilinogen synthase activity	3/15033	0.230483
leaf vs rootⅡ	3	GO:0008883	MF	glutamyl-tRNA reductase activity	3/15033	0.230483
leaf vs rootⅡ	3	GO:0008920	MF	lipopolysaccharide heptosyltransferase activity	3/15033	0.230483
leaf vs rootⅡ	3	GO:0032441	MF	pheophorbide a oxygenase activity	3/15033	0.230483
leaf vs rootⅡ	3	GO:0047209	MF	coniferyl-alcohol glucosyltransferase activity	3/15033	0.230483
leaf vs rootⅡ	100	GO:0006575	BP	cellular modified amino acid metabolic process	100/15033	0.232728
leaf vs rootⅡ	19	GO:0071941	BP	nitrogen cycle metabolic process	19/15033	0.233687
leaf vs rootⅡ	19	GO:0010224	BP	response to UV-B	19/15033	0.233687
leaf vs rootⅡ	22	GO:0004449	MF	isocitrate dehydrogenase (NAD+) activity	22/15033	0.236346
leaf vs rootⅡ	31	GO:0043243	BP	positive regulation of protein complex disassembly	31/15033	0.240029
leaf vs rootⅡ	38	GO:0006551	BP	leucine metabolic process	38/15033	0.240029
leaf vs rootⅡ	46	GO:0043244	BP	regulation of protein complex disassembly	46/15033	0.244428
leaf vs rootⅡ	8	GO:0006105	BP	succinate metabolic process	8/15033	0.244428
leaf vs rootⅡ	8	GO:0010275	BP	NAD(P)H dehydrogenase complex assembly	8/15033	0.244428
leaf vs rootⅡ	8	GO:0015288	MF	porin activity	8/15033	0.244428
leaf vs rootⅡ	8	GO:0010242	MF	oxygen evolving activity	8/15033	0.244428
leaf vs rootⅡ	8	GO:0004867	MF	serine-type endopeptidase inhibitor activity	8/15033	0.244428
leaf vs rootⅡ	8	GO:0022829	MF	wide pore channel activity	8/15033	0.244428
leaf vs rootⅡ	25	GO:0006020	BP	inositol metabolic process	25/15033	0.247533
leaf vs rootⅡ	925	GO:0006950	BP	response to stress	925/15033	0.247609
leaf vs rootⅡ	60	GO:0015295	MF	solute:proton symporter activity	60/15033	0.251558
leaf vs rootⅡ	12	GO:0010089	BP	xylem development	12/15033	0.255588
leaf vs rootⅡ	22	GO:0003995	MF	acyl-CoA dehydrogenase activity	22/15033	0.25581
leaf vs rootⅡ	39	GO:0015605	MF	organophosphate ester transmembrane transporter activity	39/15033	0.25673
leaf vs rootⅡ	29	GO:0006097	BP	glyoxylate cycle	29/15033	0.263814
leaf vs rootⅡ	23	GO:0046500	BP	S-adenosylmethionine metabolic process	23/15033	0.265897
leaf vs rootⅡ	4	GO:0033212	BP	iron import into cell	4/15033	0.265897
leaf vs rootⅡ	4	GO:0033215	BP	reductive iron assimilation	4/15033	0.265897
leaf vs rootⅡ	4	GO:0035494	BP	SNARE complex disassembly	4/15033	0.265897
leaf vs rootⅡ	5	GO:0005987	BP	sucrose catabolic process	5/15033	0.265897
leaf vs rootⅡ	5	GO:0046218	BP	indolalkylamine catabolic process	5/15033	0.265897
leaf vs rootⅡ	5	GO:0006569	BP	tryptophan catabolic process	5/15033	0.265897
leaf vs rootⅡ	5	GO:0070189	BP	kynurenine metabolic process	5/15033	0.265897
leaf vs rootⅡ	5	GO:0019441	BP	tryptophan catabolic process to kynurenine	5/15033	0.265897
leaf vs rootⅡ	113	GO:0006820	BP	anion transport	113/15033	0.265897
leaf vs rootⅡ	17	GO:0010193	BP	response to ozone	17/15033	0.265897
leaf vs rootⅡ	296	GO:1901137	BP	carbohydrate derivative biosynthetic process	296/15033	0.265897
leaf vs rootⅡ	4	GO:0042719	CC	mitochondrial intermembrane space protein transporter complex	4/15033	0.265897
leaf vs rootⅡ	4	GO:0072686	CC	mitotic spindle	4/15033	0.265897
leaf vs rootⅡ	5	GO:0098552	CC	side of membrane	5/15033	0.265897
leaf vs rootⅡ	23	GO:0004781	MF	sulfate adenylyltransferase (ATP) activity	23/15033	0.265897
leaf vs rootⅡ	23	GO:0004779	MF	sulfate adenylyltransferase activity	23/15033	0.265897
leaf vs rootⅡ	4	GO:0050645	MF	limonoid glucosyltransferase activity	4/15033	0.265897
leaf vs rootⅡ	4	GO:0008661	MF	1-deoxy-D-xylulose-5-phosphate synthase activity	4/15033	0.265897
leaf vs rootⅡ	4	GO:0004061	MF	arylformamidase activity	4/15033	0.265897
leaf vs rootⅡ	4	GO:0004366	MF	glycerol-3-phosphate O-acyltransferase activity	4/15033	0.265897
leaf vs rootⅡ	4	GO:0102420	MF	sn-1-glycerol-3-phosphate C16:0-DCA-CoA acyl transferase activity	4/15033	0.265897
leaf vs rootⅡ	5	GO:0047061	MF	glucose-fructose oxidoreductase activity	5/15033	0.265897
leaf vs rootⅡ	5	GO:0003913	MF	DNA photolyase activity	5/15033	0.265897
leaf vs rootⅡ	5	GO:0030749	MF	loganate O-methyltransferase activity	5/15033	0.265897
leaf vs rootⅡ	5	GO:0047196	MF	long-chain-alcohol O-fatty-acyltransferase activity	5/15033	0.265897
leaf vs rootⅡ	5	GO:0000064	MF	L-ornithine transmembrane transporter activity	5/15033	0.265897
leaf vs rootⅡ	5	GO:0004303	MF	estradiol 17-beta-dehydrogenase activity	5/15033	0.265897
leaf vs rootⅡ	17	GO:0019209	MF	kinase activator activity	17/15033	0.265897
leaf vs rootⅡ	17	GO:0043878	MF	glyceraldehyde-3-phosphate dehydrogenase (NAD+) (non-phosphorylating) activity	17/15033	0.265897
leaf vs rootⅡ	17	GO:0030295	MF	protein kinase activator activity	17/15033	0.265897
leaf vs rootⅡ	13	GO:0042256	BP	mature ribosome assembly	13/15033	0.27532
leaf vs rootⅡ	30	GO:0046487	BP	glyoxylate metabolic process	30/15033	0.278807
leaf vs rootⅡ	18	GO:0042255	BP	ribosome assembly	18/15033	0.282966
stem vs rootⅠ	48	GO:0008037	BP	cell recognition	48/4376	0.000511753
stem vs rootⅠ	12	GO:0019310	BP	inositol catabolic process	12/4376	0.000511753
stem vs rootⅠ	47	GO:0048544	BP	recognition of pollen	47/4376	0.000511753
stem vs rootⅠ	118	GO:0006468	BP	protein phosphorylation	118/4376	0.000511753
stem vs rootⅠ	52	GO:0031226	CC	intrinsic component of plasma membrane	52/4376	0.000511753
stem vs rootⅠ	22	GO:0004715	MF	non-membrane spanning protein tyrosine kinase activity	22/4376	0.000511753
stem vs rootⅠ	40	GO:0004675	MF	transmembrane receptor protein serine/threonine kinase activity	40/4376	0.000511753
stem vs rootⅠ	13	GO:0008271	MF	secondary active sulfate transmembrane transporter activity	13/4376	0.000511753
stem vs rootⅠ	12	GO:0050113	MF	inositol oxygenase activity	12/4376	0.000511753
stem vs rootⅠ	52	GO:0004713	MF	protein tyrosine kinase activity	52/4376	0.000511753
stem vs rootⅠ	59	GO:0004888	MF	transmembrane signaling receptor activity	59/4376	0.000511753
stem vs rootⅠ	57	GO:0019199	MF	transmembrane receptor protein kinase activity	57/4376	0.000511753
stem vs rootⅠ	69	GO:0060089	MF	molecular transducer activity	69/4376	0.000511753
stem vs rootⅠ	9	GO:0033612	MF	receptor serine/threonine kinase binding	9/4376	0.000511753
stem vs rootⅠ	118	GO:0043565	MF	sequence-specific DNA binding	118/4376	0.000511753
stem vs rootⅠ	66	GO:0038023	MF	signaling receptor activity	66/4376	0.000511753
stem vs rootⅠ	111	GO:0016705	MF	oxidoreductase activity, acting on paired donors, with incorporation or reduction of molecular oxygen	111/4376	0.000511753
stem vs rootⅠ	123	GO:0046983	MF	protein dimerization activity	123/4376	0.000511753
stem vs rootⅠ	116	GO:0030246	MF	carbohydrate binding	116/4376	0.000511753
stem vs rootⅠ	155	GO:0140110	MF	transcription regulator activity	155/4376	0.000511753
stem vs rootⅠ	100	GO:0005506	MF	iron ion binding	100/4376	0.000511753
stem vs rootⅠ	144	GO:0003700	MF	DNA-binding transcription factor activity	144/4376	0.000511753
stem vs rootⅠ	45	GO:0044212	MF	transcription regulatory region DNA binding	45/4376	0.000511753
stem vs rootⅠ	45	GO:0001067	MF	regulatory region nucleic acid binding	45/4376	0.000511753
stem vs rootⅠ	317	GO:0005886	CC	plasma membrane	317/4376	0.000528309
stem vs rootⅠ	35	GO:0005887	CC	integral component of plasma membrane	35/4376	0.000528309
stem vs rootⅠ	264	GO:0004674	MF	protein serine/threonine kinase activity	264/4376	0.000528309
stem vs rootⅠ	387	GO:0004672	MF	protein kinase activity	387/4376	0.000528309
stem vs rootⅠ	293	GO:0043531	MF	ADP binding	293/4376	0.000528309
stem vs rootⅠ	483	GO:0016301	MF	kinase activity	483/4376	0.000539894
stem vs rootⅠ	392	GO:0003677	MF	DNA binding	392/4376	0.000539894
stem vs rootⅠ	406	GO:0016773	MF	phosphotransferase activity, alcohol group as acceptor	406/4376	0.000539894
stem vs rootⅠ	570	GO:0016772	MF	transferase activity, transferring phosphorus-containing groups	570/4376	0.000633843
stem vs rootⅠ	16	GO:1901616	BP	organic hydroxy compound catabolic process	16/4376	0.000644383
stem vs rootⅠ	15	GO:0046174	BP	polyol catabolic process	15/4376	0.000661997
stem vs rootⅠ	1564	GO:0016021	CC	integral component of membrane	1564/4376	0.000772204
stem vs rootⅠ	1571	GO:0031224	CC	intrinsic component of membrane	1571/4376	0.000775141
stem vs rootⅠ	1623	GO:0044425	CC	membrane part	1623/4376	0.000807539
stem vs rootⅠ	15	GO:0046164	BP	alcohol catabolic process	15/4376	0.000810215
stem vs rootⅠ	44	GO:0016709	MF	oxidoreductase activity, acting on paired donors, with incorporation or reduction of molecular oxygen, NAD(P)H as one donor, and incorporation of one atom of oxygen	44/4376	0.00090945
stem vs rootⅠ	140	GO:0016310	BP	phosphorylation	140/4376	0.00107887
stem vs rootⅠ	78	GO:0004497	MF	monooxygenase activity	78/4376	0.00121044
stem vs rootⅠ	24	GO:0009734	BP	auxin-activated signaling pathway	24/4376	0.00147563
stem vs rootⅠ	14	GO:0015116	MF	sulfate transmembrane transporter activity	14/4376	0.00167251
stem vs rootⅠ	103	GO:0005576	CC	extracellular region	103/4376	0.00187467
stem vs rootⅠ	64	GO:0044459	CC	plasma membrane part	64/4376	0.00233044
stem vs rootⅠ	15	GO:0010087	BP	phloem or xylem histogenesis	15/4376	0.00244073
stem vs rootⅠ	62	GO:0022853	MF	active ion transmembrane transporter activity	62/4376	0.00244073
stem vs rootⅠ	335	GO:0022857	MF	transmembrane transporter activity	335/4376	0.00264897
stem vs rootⅠ	494	GO:0003735	MF	structural constituent of ribosome	494/4376	0.00280319
stem vs rootⅠ	20	GO:0015301	MF	anion:anion antiporter activity	20/4376	0.00319607
stem vs rootⅠ	20	GO:0140323	MF	solute:anion antiporter activity	20/4376	0.00319607
stem vs rootⅠ	120	GO:0022804	MF	active transmembrane transporter activity	120/4376	0.0034168
stem vs rootⅠ	12	GO:0042343	BP	indole glucosinolate metabolic process	12/4376	0.00399628
stem vs rootⅠ	14	GO:0008889	MF	glycerophosphodiester phosphodiesterase activity	14/4376	0.00418787
stem vs rootⅠ	25	GO:0016706	MF	2-oxoglutarate-dependent dioxygenase activity	25/4376	0.00426668
stem vs rootⅠ	5	GO:0047061	MF	glucose-fructose oxidoreductase activity	5/4376	0.00583493
[truncated: 1,033 more rows]
